# Supplementary material
Source: publisher figshare collection journal article supplement (https://gsajournals.figshare.com/ndownloader/files/27983718)
Supplement: Supplementary file 1 [file 27983718]

## Sheet: tRNA-Pro-G3U70
Raw SGA Results and Validation Data for tRNA-Pro-G3:U70 (Pro -> Ala)
Berg et al. 2021
SGA Screen Data												Validation Data
Query Name	Array ORF	Array Name	Array annotation	Normalized colony size (EXPERIMENT)	Normalized colony std. dev. (EXPERIMENT)	Normalized colony size (CONTROL)	Normalized colony std. dev. (CONTROL)	Score	Score stdev	p-Value	Additional information	Ratio of mistranslating tRNA/WT tRNA in control strain	Ratio of mistranslating tRNA/WT tRNA in temperature sensitive strain
tRNA-Pro(G3:U70)	YJR076C	CDC11	cdc11-4	0.76867	0.021	1.06186	0.023	-0.29808	0.021	0.00024	status=JK	0.96	0.102934
tRNA-Pro(G3:U70)	YFR050C	PRE4	pre4-ph	0.6599	0.009	0.88242	0.019	-0.22565	0.009	0		0.96	0.54232
tRNA-Pro(G3:U70)	YNR003C	RPC34	rpc34-1	0.42494	0.01	0.64706	0.037	-0.21974	0.01	0.00019	status=JK	0.96	0.586832
tRNA-Pro(G3:U70)	YDL097C	RPN6	rpn6-ph	0.6558	0.043	0.87541	0.03	-0.22068	0.043	8e-05		0.96	0.617018
tRNA-Pro(G3:U70)	YJR065C	ARP3	arp3-d11a	0.5075	0.118	0.70245	0.126	-0.23421	0.118	0.00331		0.96	0.654449
tRNA-Pro(G3:U70)	YMR043W	MCM1	mcm1-ph	0.34698	0.2	0.84935	0.132	-0.50661	0.2	0.04023		0.96	0.699037
tRNA-Pro(G3:U70)	YFR052W	RPN12	rpn12-1	0.70527	0.059	0.91602	0.052	-0.22048	0.059	0.00016		0.96	0.73807
tRNA-Pro(G3:U70)	YOR262W	YOR262W	yor262w-ph	0.66605	0.173	0.89803	0.027	-0.23934	0.172	0.00452		0.96	0.760037
tRNA-Pro(G3:U70)	YLR045C	STU2	stu2-10	0.22842	0.045	0.44328	0.221	-0.21914	0.045	0.01268	status=JK	0.96	0.762775
tRNA-Pro(G3:U70)	YDR478W	SNM1	snm1-172	0.78344	0.139	0.98422	0.013	-0.2059	0.138	0.00148		0.96	0.801874
tRNA-Pro(G3:U70)	YKL145W	RPT1	rpt1-1	0.40128	0.045	0.72515	0.022	-0.31485	0.045	0.00039		0.96	0.905607
tRNA-Pro(G3:U70)	YGL048C	RPT6	rpt6-1	0.5785	0.079	0.77872	0.03	-0.20649	0.079	0.00069		0.96	0.922447
tRNA-Pro(G3:U70)	YJR057W	CDC8	cdc8-1	0.35122	0.162	0.78128	0.031	-0.44629	0.162	0.0228		0.96	0.963689
tRNA-Pro(G3:U70)	YFR004W	RPN11	rpn11-8	0.58033	0.014	0.79258	0.026	-0.20553	0.014	0.0002	status=JK	0.96	0.975012
tRNA-Pro(G3:U70)	YGL048C	RPT6	rpt6-25	0.27904	0.077	0.47353	0.015	-0.20283	0.077	0.00544		0.96	0.977017
tRNA-Pro(G3:U70)	YJR065C	ARP3	arp3-g15c	0.16393	0.037	0.40405	0.111	-0.20182	0.037	0.01643	status=JK	0.96	0.985433
tRNA-Pro(G3:U70)	YHR020W	YHR020W	yhr020w-ph	0.80763	0.075	1.09773	0.046	-0.2833	0.075	0.00022		0.96	1.05946
tRNA-Pro(G3:U70)	YLR321C	SFH1	sfh1-1	0.23494	0.011	0.43686	0.035	-0.20086	0.011	0.00077	status=JK	0.96	1.07509
tRNA-Pro(G3:U70)	YBR200W	BEM1		0.74268	0.51	1.05866	0.172	-0.41419	0.509	0.06176
tRNA-Pro(G3:U70)	YGL097W	SRM1	srm1-ts	0.57629	0.402	0.75152	0.083	-0.21068	0.401	0.06415
tRNA-Pro(G3:U70)	YPR108W	RPN7	rpn7-3	0.30718	0.359	0.50638	0.358	-0.3011	0.359	0.18557
tRNA-Pro(G3:U70)	YOL123W	HRP1	hrp1-7	0.003	0.004	0.41936	0.488	-0.37843	0.004	0.20928
tRNA-Pro(G3:U70)	YAL003W	EFB1	efb1-4	0.07724	0.134	0.58802	0.679	-0.49813	0.134	0.42265	status=JK
tRNA-Pro(G3:U70)	YPL043W	NOP4	nop4-3	0.04603	0.08	0.5498	0.367	-0.46182	0.08	0.42265	status=JK
tRNA-Pro(G3:U70)	YDL090C	RAM1	ram1-119	0	0	0.94241	0.025	-0.94755	0	#NUM!	status=JK
tRNA-Pro(G3:U70)	YLR418C	CDC73		0	0	0.36294	0.439	-0.28269	0	#NUM!	status=JK
tRNA-Pro(G3:U70)	YJR076C	CDC11	cdc11-5	0.49109	0.155	0.76553	0.282	-0.19527	0.154	0.00789
tRNA-Pro(G3:U70)	YDR235W	PRP42	prp42-ph	0.24435	0.05	0.50452	0.21	-0.19261	0.05	0.01377	status=JK
tRNA-Pro(G3:U70)	YDL029W	ARP2	arp2-14	1.05583	0.048	1.24989	0.014	-0.19167	0.048	3e-05
tRNA-Pro(G3:U70)	YFR051C	RET2	ret2-1	0.96527	0.059	1.15668	0.072	-0.18643	0.059	6e-05
tRNA-Pro(G3:U70)	YPR110C	RPC40	rpc40-v78r	0.19098	0.039	0.37194	0.06	-0.18233	0.039	0.00223
tRNA-Pro(G3:U70)	YIL061C	SNP1	yil061c-ph	0.72861	0.148	0.90866	0.104	-0.18065	0.148	0.00222
tRNA-Pro(G3:U70)	YGL116W	CDC20	cdc20-1	0.8758	0.012	1.05777	0.008	-0.17922	0.012	0
tRNA-Pro(G3:U70)	YLR430W	SEN1	sen1-1	0.63071	0.083	0.80794	0.042	-0.17913	0.083	0.00061
tRNA-Pro(G3:U70)	YFL039C	ACT1	act1-112	0.69615	0.007	0.87637	0.024	-0.17744	0.007	0
tRNA-Pro(G3:U70)	YNL071W	LAT1		0.8494	0.069	0.96296	0.25	-0.17536	0.069	0.00015
tRNA-Pro(G3:U70)	YPL094C	SEC62	sec62-ts	0.66651	0.022	0.84252	0.031	-0.17473	0.022	0.00035	status=JK
tRNA-Pro(G3:U70)	YFL039C	ACT1	act1-108	0.83146	0.041	1.01562	0.075	-0.17454	0.041	3e-05
tRNA-Pro(G3:U70)	YOR116C	RPO31	rpo31-698	0.72976	0.01	0.90297	0.006	-0.17433	0.01	0
tRNA-Pro(G3:U70)	YGL073W	HSF1	hsf1-848	0.95577	0.026	1.11973	0.02	-0.17007	0.026	1e-05
tRNA-Pro(G3:U70)	YBL034C	STU1	stu1-8	0.87898	0.006	1.04483	0.016	-0.16353	0.006	2e-05	status=JK
tRNA-Pro(G3:U70)	YJL194W	CDC6	cdc6-1	0.64301	0.037	0.80506	0.006	-0.16132	0.037	5e-05
tRNA-Pro(G3:U70)	YGR253C	PUP2	pup2-ph	0.83681	0.02	0.98942	0.015	-0.1574	0.02	0
tRNA-Pro(G3:U70)	YOR224C	RPB8	rpb8-ph	0.84838	0.096	1.012	0.078	-0.15652	0.096	0.0004
tRNA-Pro(G3:U70)	YLR274W	MCM5	cdc46-1	0.87343	0.046	1.03116	0.022	-0.15416	0.046	4e-05
tRNA-Pro(G3:U70)	YPR178W	PRP4	prp4-ts	0.83209	0.059	0.99447	0.035	-0.15383	0.059	0.0001
tRNA-Pro(G3:U70)	YOR181W	LAS17	las17-14	0.89583	0.019	1.03545	0.015	-0.14903	0.019	0
tRNA-Pro(G3:U70)	YDL084W	SUB2	sub2-1	0.92085	0.01	1.06277	0.059	-0.14766	0.01	4e-05	status=JK
tRNA-Pro(G3:U70)	YPR161C	SGV1	sgv1-35	0.68533	0.17	0.81911	0.155	-0.14532	0.169	0.00396
tRNA-Pro(G3:U70)	YOR074C	CDC21	cdc21-1	0.32725	0.048	0.50278	0.141	-0.14187	0.048	0.00698	status=JK
tRNA-Pro(G3:U70)	YDR182W	CDC1	cdc1-4	0.22421	0.035	0.38476	0.092	-0.14178	0.035	0.00106
tRNA-Pro(G3:U70)	YDR182W	CDC1	cdc1-6	0.55856	0.021	0.70306	0.038	-0.13924	0.021	1e-05
tRNA-Pro(G3:U70)	YFL039C	ACT1	act1-136	0.88627	0.029	1.02795	0.019	-0.13897	0.029	1e-05
tRNA-Pro(G3:U70)	YDR060W	MAK21	mak21-3	0.77314	0.073	0.90893	0.081	-0.1389	0.072	0.00023
tRNA-Pro(G3:U70)	YPR181C	SEC23	sec23-1	0.17194	0.009	0.29449	0.063	-0.13793	0.009	0.00096	status=JK
tRNA-Pro(G3:U70)	YLR459W	GAB1	gab1-2	0.79522	0.061	0.90252	0.115	-0.13697	0.061	0.00196	status=JK
tRNA-Pro(G3:U70)	YDR449C	UTP6	ydr449c-ph	0.95293	0.086	1.09782	0.083	-0.13678	0.086	0.0002
tRNA-Pro(G3:U70)	YML130C	ERO1	ero1-1	0.86234	0.094	1.02266	0.096	-0.13666	0.094	0.00035
tRNA-Pro(G3:U70)	YHR027C	RPN1	rpn1-821	0.77653	0.012	0.91543	0.017	-0.13621	0.012	8e-05	status=JK
tRNA-Pro(G3:U70)	YFR004W	RPN11	rpn11-14	0.8068	0.024	0.93776	0.003	-0.13288	0.024	1e-05
tRNA-Pro(G3:U70)	YML049C	RSE1	rse1-1	0.77517	0.043	0.90816	0.037	-0.13173	0.043	5e-05
tRNA-Pro(G3:U70)	YCR002C	CDC10	cdc10-5	0.17502	0.057	0.31072	0.077	-0.13134	0.057	0.00876
tRNA-Pro(G3:U70)	YOL038W	PRE6	pre6-ph	0.91707	0.044	1.04175	0.012	-0.13126	0.044	3e-05
tRNA-Pro(G3:U70)	YLR430W	SEN1	sen1-1	0.66034	0.101	0.78185	0.138	-0.13123	0.101	0.00096
tRNA-Pro(G3:U70)	YML069W	POB3	pob3-l78r	0.42569	0.094	0.55928	0.033	-0.12967	0.094	0.00283
tRNA-Pro(G3:U70)	YMR061W	RNA14	rna14-ph	0.76395	0.076	0.87844	0.07	-0.12964	0.076	0.00027
tRNA-Pro(G3:U70)	YMR198W	CIK1		0.97287	0.047	1.10629	0.016	-0.12851	0.047	3e-05
tRNA-Pro(G3:U70)	YOR259C	RPT4	rpt4-150	0.99843	0.054	1.13152	0.04	-0.1276	0.054	4e-05
tRNA-Pro(G3:U70)	YOR326W	MYO2	myo2-16	1.20681	0.033	1.32994	0.011	-0.12577	0.033	1e-05
tRNA-Pro(G3:U70)	YBR154C	RPB5	rpb5-h147r	1.01679	0.01	1.13399	0.018	-0.12312	0.01	3e-05	status=JK
tRNA-Pro(G3:U70)	YDR212W	TCP1	tcp1-2	0.95074	0.045	1.07896	0.051	-0.12152	0.045	3e-05
tRNA-Pro(G3:U70)	YMR272C	SCS7		0.55363	0.089	0.68319	0.044	-0.12137	0.089	0.00114
tRNA-Pro(G3:U70)	YGR218W	CRM1	crm1-1	0.81403	0.035	0.93155	0.008	-0.12049	0.035	2e-05
tRNA-Pro(G3:U70)	YFL045C	SEC53	sec53-6	0.72049	0.036	0.83488	0.033	-0.12048	0.036	3e-05
tRNA-Pro(G3:U70)	YFR028C	CDC14	cdc14-2	0.71753	0.048	0.84521	0.036	-0.12027	0.048	8e-05
tRNA-Pro(G3:U70)	YGL097W	SRM1	srm1-g282s	0.11691	0.026	0.22964	0.029	-0.11797	0.026	0.00281
tRNA-Pro(G3:U70)	YMR134W	YMR134W	ymr134w-ph	0.88584	0.088	0.9956	0.019	-0.11766	0.087	0.00026
tRNA-Pro(G3:U70)	YBR160W	CDC28	cdc28-td	0.19484	0.253	0.28095	0.082	-0.11761	0.253	0.22101
tRNA-Pro(G3:U70)	YDL102W	POL3	cdc2-7	0.42399	0.049	0.53456	0.078	-0.11719	0.049	0.00042
tRNA-Pro(G3:U70)	YOR204W	DED1	ded1-95	0.90377	0.013	1.01114	0.052	-0.11694	0.013	7e-05	status=JK
tRNA-Pro(G3:U70)	YIL144W	TID3	tid3-1	0.99306	0.017	1.10764	0.03	-0.11631	0.017	0
tRNA-Pro(G3:U70)	YPR190C	RPC82	ypr190c-ph	0.98449	0.038	1.10306	0.013	-0.11604	0.038	2e-05
tRNA-Pro(G3:U70)	YDR086C	SSS1	sss1-ph	1.06847	0.057	1.1802	0.057	-0.11505	0.057	4e-05
tRNA-Pro(G3:U70)	YJL081C	ARP4	arp4-g161d	0.63123	0.127	0.73614	0.019	-0.11407	0.127	0.00215
tRNA-Pro(G3:U70)	YLR200W	YKE2		0.92228	0.022	1.03899	0.071	-0.1139	0.022	0.0002	status=JK
tRNA-Pro(G3:U70)	YOR181W	LAS17	las17-1	0.53136	0.052	0.64796	0.027	-0.11353	0.052	0.00025
tRNA-Pro(G3:U70)	YGL116W	CDC20	cdc20-2	1.25942	0.074	1.36779	0.011	-0.11347	0.074	6e-05
tRNA-Pro(G3:U70)	YML069W	POB3	pob3-7	0.66293	0.067	0.77438	0.075	-0.11324	0.066	0.00028
tRNA-Pro(G3:U70)	YBR198C	TAF5	taf5-3	0.74496	0.106	0.86729	0.022	-0.11256	0.106	0.00078
tRNA-Pro(G3:U70)	YGR270W	YTA7		0.73789	0.052	0.85955	0.039	-0.11237	0.052	0.0001
tRNA-Pro(G3:U70)	YDR172W	SUP35	sup35-td	0.52885	0.045	0.63942	0.016	-0.1123	0.045	0.00017
tRNA-Pro(G3:U70)	YER094C	PUP3	pup3-ph	0.80394	0.056	0.89794	0.034	-0.11121	0.056	9e-05
tRNA-Pro(G3:U70)	YGR156W	PTI1	pti1-ts7	0.99416	0.015	1.10202	0.006	-0.11023	0.014	7e-05	status=JK
tRNA-Pro(G3:U70)	YFL009W	CDC4	cdc4-2	0.01321	0.023	0.16639	0.206	-0.1085	0.023	0.42265	status=JK
tRNA-Pro(G3:U70)	YLL003W	SFI1	sfi1-7	0.65593	0.362	0.6623	0.32	-0.10819	0.362	0.03627
tRNA-Pro(G3:U70)	YBR254C	TRS20	trs20-ph	0.72351	0.008	0.83501	0.019	-0.10784	0.008	4e-05	status=JK
tRNA-Pro(G3:U70)	YDL097C	RPN6	rpn6-1	0.97491	0.041	1.08327	0.056	-0.10603	0.041	2e-05
tRNA-Pro(G3:U70)	YDL020C	RPN4		0.88728	0.016	0.99045	0.032	-0.10466	0.016	0.00011	status=JK
tRNA-Pro(G3:U70)	YNL153C	GIM3		0.9676	0.045	1.06843	0.07	-0.10441	0.045	0	status=JK
tRNA-Pro(G3:U70)	YJL011C	RPC17	yjl011c-ph	0.87717	0.012	0.98411	0.017	-0.10441	0.011	0
tRNA-Pro(G3:U70)	YDR180W	SCC2	scc2-4	0.90135	0.007	1.00668	0.055	-0.10409	0.007	2e-05	status=JK
tRNA-Pro(G3:U70)	YFL039C	ACT1	act1-129	0.87981	0.08	0.96059	0.118	-0.10392	0.079	0.0002
tRNA-Pro(G3:U70)	YLR459W	GAB1	gab1-1	0.98391	0.04	1.08692	0.021	-0.10297	0.04	2e-05
tRNA-Pro(G3:U70)	YLR212C	TUB4	tub4-y445d	0.85127	0.005	0.9535	0.004	-0.10277	0.005	1e-05	status=JK
tRNA-Pro(G3:U70)	YPL007C	TFC8	tfc8-ph	1.14009	0.014	1.23996	0.041	-0.10274	0.014	0
tRNA-Pro(G3:U70)	YBR121C	GRS1	grs1-ph	0.91807	0.005	1.0189	0.016	-0.10228	0.005	0
tRNA-Pro(G3:U70)	YNL102W	POL1	pol1-13	0.94036	0.068	1.03865	0.016	-0.10121	0.068	0.00011
tRNA-Pro(G3:U70)	YBR198C	TAF5	taf5-15	0.76975	0.096	0.85951	0.029	-0.10031	0.096	0.00053
tRNA-Pro(G3:U70)	YBR247C	ENP1	enp1-1	0.98859	0.02	1.08439	0.009	-0.09983	0.02	0.00014	status=JK
tRNA-Pro(G3:U70)	YLR340W	RPP0	rpp0-ph	1.03557	0.005	1.13035	0.021	-0.09898	0.005	1e-05	status=JK
tRNA-Pro(G3:U70)	YMR308C	PSE1	pse1-41	0.64774	0.443	0.68995	0.325	-0.0977	0.443	0.06141
tRNA-Pro(G3:U70)	YPR178W	PRP4	prp4-1	0.95686	0.046	1.0667	0.048	-0.09761	0.045	3e-05
tRNA-Pro(G3:U70)	YDL064W	UBC9	ubc9-2	0.98647	0.026	1.07523	0.039	-0.09749	0.026	0
tRNA-Pro(G3:U70)	YOR341W	RPA190	rpa190-1	0.94917	0.059	1.03766	0.031	-0.09706	0.059	6e-05
tRNA-Pro(G3:U70)	YHR065C	RRP3	yhr065c-ph	0.9336	0.051	1.03427	0.015	-0.09699	0.051	5e-05
tRNA-Pro(G3:U70)	YLR116W	MSL5	msl5-9	0.9846	0.053	1.07048	0.046	-0.0966	0.053	4e-05
tRNA-Pro(G3:U70)	YLR298C	YHC1	yhc1-8	0.97771	0.069	1.07348	0.042	-0.09609	0.069	0.0001
tRNA-Pro(G3:U70)	YKL018W	SWD2	swd2-ts1	1.06011	0.135	1.12241	0.123	-0.09282	0.135	0.00056
tRNA-Pro(G3:U70)	YPR161C	SGV1	ypr161c-ph	0.93512	0.04	1.04084	0.056	-0.09211	0.04	2e-05
tRNA-Pro(G3:U70)	YGL022W	STT3	stt3-1	0.4577	0.036	0.53988	0.046	-0.09132	0.036	0.00014
tRNA-Pro(G3:U70)	YGL116W	CDC20	cdc20-3	1.0447	0.014	1.12496	0.032	-0.09027	0.014	0
tRNA-Pro(G3:U70)	YML023C	NSE5	nse5-ts1	0.65858	0.019	0.7519	0.012	-0.08986	0.019	1e-05
tRNA-Pro(G3:U70)	YGR098C	ESP1	esp1-1	1.09606	0.008	1.18734	0.004	-0.08945	0.008	2e-05	status=JK
tRNA-Pro(G3:U70)	YBR153W	RIB7	rib7-ph	1.0589	0.005	1.15142	0.04	-0.08914	0.005	1e-05	status=JK
tRNA-Pro(G3:U70)	YDR045C	RPC11	rpc11-ph	1.01663	0.011	1.10385	0.041	-0.0889	0.011	4e-05	status=JK
tRNA-Pro(G3:U70)	YDR364C	CDC40	cdc40-ts	0.24283	0.033	0.32965	0.109	-0.08767	0.033	0.00625	status=JK
tRNA-Pro(G3:U70)	YOR157C	PUP1	pup1-1	0.93943	0.019	1.02659	0.001	-0.0873	0.019	0
tRNA-Pro(G3:U70)	YNL153C	GIM3		0.81396	0.005	0.90899	0.138	-0.08668	0.005	1e-05	status=JK
tRNA-Pro(G3:U70)	YJR046W	TAH11	tah11-ts	0.84486	0.033	0.93385	0.015	-0.0866	0.033	2e-05
tRNA-Pro(G3:U70)	YBR160W	CDC28	cdc28-1	1.0671	0.058	1.15827	0.042	-0.08643	0.058	4e-05
tRNA-Pro(G3:U70)	YOR362C	PRE10	yor362c-ph	0.34037	0.031	0.45585	0.111	-0.08588	0.031	0.00021
tRNA-Pro(G3:U70)	YHR066W	SSF1		1.03284	0.095	1.11784	0.046	-0.08396	0.094	0.00021
tRNA-Pro(G3:U70)	YKR081C	RPF2	rpf2-ph	0.90593	0.014	0.98538	0.065	-0.08374	0.014	0
tRNA-Pro(G3:U70)	YOR048C	RAT1	rat1-1	0.80436	0.064	0.9004	0.049	-0.08372	0.064	0.00014
tRNA-Pro(G3:U70)	YOR341W	RPA190	rpa190-g728d	0.77974	0.045	0.86265	0.008	-0.08363	0.045	5e-05
tRNA-Pro(G3:U70)	YDR062W	LCB2	lcb2-19	0.52465	0.142	0.59674	0.124	-0.08312	0.142	0.00515
tRNA-Pro(G3:U70)	YLR298C	YHC1	yhc1-2	0.34684	0.228	0.45063	0.194	-0.08273	0.228	0.05563
tRNA-Pro(G3:U70)	YFL039C	ACT1	act1-3	0.88981	0.06	0.97126	0.053	-0.08235	0.06	8e-05
tRNA-Pro(G3:U70)	YBR257W	POP4	pop4-ph	0.63535	0.013	0.70831	0.021	-0.08188	0.013	0.00014	status=JK
tRNA-Pro(G3:U70)	YNL118C	DCP2	dcp2-7	0.7642	0.421	0.83291	0.184	-0.08085	0.42	0.03589
tRNA-Pro(G3:U70)	YPL209C	IPL1	ipl1-2	0.93479	0.04	1.01218	0.042	-0.07992	0.04	2e-05
tRNA-Pro(G3:U70)	YMR168C	CEP3	cep3-2	0.85865	0.035	0.91633	0.073	-0.07969	0.035	0.00055	status=JK
tRNA-Pro(G3:U70)	YML031W	NDC1	ndc1-4	0.30663	0.106	0.41534	0.126	-0.07958	0.106	0.01035
tRNA-Pro(G3:U70)	YDR083W	RRP8		0.91931	0.092	0.99392	0.043	-0.07918	0.092	0.00027
tRNA-Pro(G3:U70)	YBR160W	CDC28	cdc28-4	0.93371	0.101	1.03256	0.091	-0.0791	0.101	0.00035
tRNA-Pro(G3:U70)	YLR195C	NMT1	nmt1-181	0.42278	0.017	0.50146	0.005	-0.07858	0.017	2e-05
tRNA-Pro(G3:U70)	YDR356W	SPC110	spc110-221	0.97161	0.021	1.04474	0.016	-0.07852	0.021	0
tRNA-Pro(G3:U70)	YGL120C	PRP43	prp43-ts2	0.72524	0.031	0.80127	0.024	-0.07715	0.031	2e-05
tRNA-Pro(G3:U70)	YIL150C	MCM10	mcm10-1	0.85341	0.052	0.9223	0.036	-0.07705	0.052	6e-05
tRNA-Pro(G3:U70)	YDR473C	PRP3	prp3-1	0.94479	0.046	1.02163	0.029	-0.07692	0.046	3e-05
tRNA-Pro(G3:U70)	YKR020W	VPS51		0.89082	0.007	0.96538	0.031	-0.07682	0.007	2e-05	status=JK
tRNA-Pro(G3:U70)	YPL209C	IPL1	ipl1-1	0.59083	0.053	0.6739	0.055	-0.07675	0.053	0.0002
tRNA-Pro(G3:U70)	YLR186W	EMG1	emg1-ph	0.80181	0.016	0.87662	0.013	-0.07669	0.016	0
tRNA-Pro(G3:U70)	YNL132W	KRE33	ynl132w-ph	0.8541	0.026	0.91757	0.04	-0.0765	0.026	1e-05
tRNA-Pro(G3:U70)	YFL034C-B	MOB2	mob2-19	0.85101	0.077	0.92436	0.06	-0.07635	0.077	0.00021
tRNA-Pro(G3:U70)	YML102W	CAC2		1.04706	0.014	1.10547	0.056	-0.07596	0.014	0
tRNA-Pro(G3:U70)	YBR196C	PGI1	pgi1-2	1.09991	0.021	1.14403	0.096	-0.07586	0.021	0.00012	status=JK
tRNA-Pro(G3:U70)	YGR047C	TFC4	ygr047c-ph	0.87701	0.1	0.94204	0.094	-0.07547	0.1	0.0004
tRNA-Pro(G3:U70)	YNL001W	DOM34		0.98782	0.026	1.06772	0.037	-0.07531	0.026	0
tRNA-Pro(G3:U70)	YHR200W	RPN10		1.05585	0.059	1.12605	0.007	-0.07502	0.058	5e-05
tRNA-Pro(G3:U70)	YDR356W	SPC110	spc110-220	0.87105	0.004	0.94431	0.003	-0.07476	0.004	1e-05	status=JK
tRNA-Pro(G3:U70)	YCR093W	CDC39	cdc39-1	1.03481	0.021	1.11076	0.006	-0.07444	0.021	0
tRNA-Pro(G3:U70)	YIL008W	URM1		0.87344	0.04	0.93883	0.081	-0.07434	0.04	0.00069	status=JK
tRNA-Pro(G3:U70)	YDR145W	TAF12	taf12-ts23	0.87155	0.044	0.94444	0.013	-0.07388	0.044	4e-05
tRNA-Pro(G3:U70)	YGR113W	DAM1	dam1-11	1.07766	0.011	1.14384	0.016	-0.07377	0.011	0
tRNA-Pro(G3:U70)	YFL039C	ACT1	act1-155	0.81297	0.022	0.88455	0.014	-0.07374	0.022	1e-05
tRNA-Pro(G3:U70)	YGL044C	RNA15	rna15-58	0.98778	0.056	1.04319	0.058	-0.07244	0.056	5e-05
tRNA-Pro(G3:U70)	YDR196C	CAB5	cab5-ph	0.17932	0.008	0.25275	0.069	-0.07084	0.008	3e-05
tRNA-Pro(G3:U70)	YDR238C	SEC26	sec26-f856aw860a	1.21213	0.037	1.28142	0.008	-0.07035	0.037	1e-05
tRNA-Pro(G3:U70)	YMR117C	SPC24	spc24-9	1.13274	0.056	1.22132	0.068	-0.06975	0.056	3e-05
tRNA-Pro(G3:U70)	YGL093W	SPC105	spc105-4	1.18705	0.035	1.25004	0.011	-0.06915	0.035	1e-05
tRNA-Pro(G3:U70)	YBR202W	MCM7	cdc47-ts	0.70659	0.063	0.77246	0.016	-0.06909	0.063	0.00264	status=JK
tRNA-Pro(G3:U70)	YBL034C	STU1	stu1-6	1.05235	0.033	1.11445	0.014	-0.06907	0.033	1e-05
tRNA-Pro(G3:U70)	YGR278W	CWC22	cwc22-ph	1.02264	0.056	1.08936	0.011	-0.06774	0.056	5e-05
tRNA-Pro(G3:U70)	YOL069W	NUF2	nuf2-ph	1.16709	0.019	1.22847	0.053	-0.0673	0.019	8e-05	status=JK
tRNA-Pro(G3:U70)	YJR045C	SSC1	ssc1-2	0.77624	0.007	0.84565	0.017	-0.06727	0.007	3e-05	status=JK
tRNA-Pro(G3:U70)	YGR185C	TYS1	tys1-1	0.95849	0.038	1.01873	0.043	-0.0668	0.038	2e-05
tRNA-Pro(G3:U70)	YDR325W	YCG1	ycg1-2	0.95476	0.011	1.01745	0.012	-0.06663	0.011	4e-05	status=JK
tRNA-Pro(G3:U70)	YBR143C	SUP45	sup45-ts	0.22838	0.211	0.29957	0.035	-0.06626	0.21	0.11868
tRNA-Pro(G3:U70)	YGR116W	SPT6	spt6-14	0.73023	0.036	0.77974	0.126	-0.06612	0.036	3e-05
tRNA-Pro(G3:U70)	YPL057C	SUR1		0.95484	0.006	1.02537	0.027	-0.06564	0.006	1e-05	status=JK
tRNA-Pro(G3:U70)	YOR174W	MED4	med4-6	0.37875	0.051	0.44596	0.015	-0.06555	0.051	0.00065
tRNA-Pro(G3:U70)	YPR133C	SPN1	spn1-k192n	0.9212	0.092	0.99453	0.102	-0.06513	0.092	0.00028
tRNA-Pro(G3:U70)	YDR182W	CDC1	cdc1-2	1.02424	0.031	1.0869	0.006	-0.06491	0.031	1e-05
tRNA-Pro(G3:U70)	YJR006W	POL31	pol31-ph	1.08932	0.04	1.15493	0.045	-0.06426	0.04	1e-05
tRNA-Pro(G3:U70)	YJL034W	KAR2	kar2-159	1.01251	0.05	1.07251	0.05	-0.064	0.05	3e-05
tRNA-Pro(G3:U70)	YLL011W	SOF1	sof1-ph	0.97686	0.096	1.04544	0.044	-0.06331	0.096	0.00026
tRNA-Pro(G3:U70)	YKL172W	EBP2	ebp2-1	0.83093	0.03	0.89175	0.02	-0.06288	0.03	1e-05
tRNA-Pro(G3:U70)	YGR172C	YIP1	yip1-ph	0.15095	0.03	0.21965	0.043	-0.06282	0.03	0.01258	status=JK
tRNA-Pro(G3:U70)	YMR123W	PKR1		0.87493	0.064	0.95275	0.084	-0.06262	0.064	0.00011
tRNA-Pro(G3:U70)	YMR290C	HAS1	has1-ph	0.83472	0.036	0.93098	0.063	-0.06236	0.035	0.0006	status=JK
tRNA-Pro(G3:U70)	YOR250C	CLP1	clp1-ph	0.17624	0.055	0.24724	0.103	-0.06168	0.055	0.00782
tRNA-Pro(G3:U70)	YGL048C	RPT6	rpt6-20	0.8996	0.039	0.96331	0.017	-0.06166	0.039	2e-05
tRNA-Pro(G3:U70)	YJR141W	YJR141W	yjr141w-ph	0.74688	0.042	0.80934	0.003	-0.06155	0.042	5e-05
tRNA-Pro(G3:U70)	YLR045C	STU2	stu2-11	0.96416	0.036	1.02517	0.019	-0.06146	0.036	1e-05
tRNA-Pro(G3:U70)	YFL039C	ACT1	act1-4	0.94628	0.041	1.01827	0.078	-0.06133	0.041	2e-05
tRNA-Pro(G3:U70)	YBR080C	SEC18	sec18-1	0.71882	0.045	0.78039	0.052	-0.06123	0.045	7e-05
tRNA-Pro(G3:U70)	YMR298W	LIP1	lip1-ph	0.74363	0.057	0.80849	0.031	-0.05938	0.057	0.00013
tRNA-Pro(G3:U70)	YPL124W	SPC29	spc29-20	0.45645	0.045	0.5134	0.112	-0.05918	0.045	0.00026
tRNA-Pro(G3:U70)	YKL104C	GFA1	gfa1-97	0.82438	0.139	0.82452	0.209	-0.0591	0.139	0.00128
tRNA-Pro(G3:U70)	YLR215C	CDC123	cdc123-4	0.7938	0.021	0.84918	0.018	-0.05837	0.021	1e-05
tRNA-Pro(G3:U70)	YLR060W	FRS1	ylr060w-ph	0.68754	0.038	0.76711	0.073	-0.05811	0.037	4e-05
tRNA-Pro(G3:U70)	YLR222C	UTP13	ylr222c-ph	0.70913	0.04	0.76598	0.031	-0.05754	0.04	5e-05
tRNA-Pro(G3:U70)	YBR167C	POP7	pop7-ph	1.03436	0.035	1.09776	0.038	-0.05727	0.035	1e-05
tRNA-Pro(G3:U70)	YDR228C	PCF11	pcf11-1	0.91483	0.054	0.96571	0.012	-0.05715	0.054	6e-05
tRNA-Pro(G3:U70)	YBR055C	PRP6	prp6-1	1.20187	0.032	1.25408	0.017	-0.0568	0.032	1e-05
tRNA-Pro(G3:U70)	YAR007C	RFA1	rfa1-m2	1.00397	0.036	1.05605	0.043	-0.05653	0.036	1e-05
tRNA-Pro(G3:U70)	YLL050C	COF1	cof1-8	0.96644	0.067	1.02329	0.032	-0.05555	0.067	9e-05
tRNA-Pro(G3:U70)	YGR092W	DBF2	dbf2-2	1.11855	0.023	1.16228	0.052	-0.05528	0.023	0.00014	status=JK
tRNA-Pro(G3:U70)	YDR054C	CDC34	cdc34-1	1.03538	0.115	1.09347	0.039	-0.05507	0.114	0.00037
tRNA-Pro(G3:U70)	YAL001C	TFC3	tfc3-g349e	1.09853	0.032	1.14979	0.009	-0.05473	0.032	1e-05
tRNA-Pro(G3:U70)	YPL055C	LGE1		1.02678	0.015	1.0795	0.004	-0.05412	0.015	7e-05	status=JK
tRNA-Pro(G3:U70)	YDR246W	TRS23	trs23-ph	0.73599	0.091	0.77766	0.072	-0.05367	0.091	0.00508	status=JK
tRNA-Pro(G3:U70)	YDR088C	SLU7	slu7-ts1	0.93552	0.024	0.98384	0.048	-0.05286	0.024	0
tRNA-Pro(G3:U70)	YOR260W	GCD1	gcd1-502	0.85257	0.153	0.89754	0.041	-0.05267	0.153	0.00155
tRNA-Pro(G3:U70)	YKR002W	PAP1	pap1-1	1.00321	0.054	1.04225	0.054	-0.05246	0.054	4e-05
tRNA-Pro(G3:U70)	YNL002C	RLP7	rlp7-ph	1.08275	0.011	1.139	0.025	-0.05226	0.011	3e-05	status=JK
tRNA-Pro(G3:U70)	YIR022W	SEC11	sec11-2	0.92405	0.032	0.97926	0.011	-0.05224	0.032	1e-05
tRNA-Pro(G3:U70)	YHR172W	SPC97	yhr172w-ph	1.0457	0.021	1.09429	0.036	-0.0521	0.021	0
tRNA-Pro(G3:U70)	YKL210W	UBA1	uba1-1	1.09425	0.015	1.13969	0.031	-0.05191	0.015	6e-05	status=JK
tRNA-Pro(G3:U70)	YGL137W	SEC27	sec27-1	1.00828	0.038	1.05741	0.018	-0.05172	0.038	1e-05
tRNA-Pro(G3:U70)	YBR082C	UBC4		1.02607	0.008	1.08111	0.032	-0.05109	0.007	2e-05	status=JK
tRNA-Pro(G3:U70)	YBL074C	AAR2	aar2-ph	0.77319	0.021	0.82024	0.017	-0.0506	0.021	0.00025	status=JK
tRNA-Pro(G3:U70)	YFL039C	ACT1	act1-121	1.14491	0.014	1.19813	0.019	-0.05036	0.014	0
tRNA-Pro(G3:U70)	YBL007C	SLA1		1.07495	0.029	1.13001	0.045	-0.05024	0.029	1e-05
tRNA-Pro(G3:U70)	YLR033W	RSC58	rsc58-ph	0.93553	0.021	0.97811	0.025	-0.05023	0.021	0
tRNA-Pro(G3:U70)	YCL059C	KRR1	krr1-17	1.02591	0.033	1.07586	0.001	-0.04989	0.033	1e-05
tRNA-Pro(G3:U70)	YER133W	GLC7	glc7-12	0.83435	0.122	0.91292	0.095	-0.04987	0.121	0.00084
tRNA-Pro(G3:U70)	YPR175W	DPB2	dpb2-1	0.92725	0.054	0.97688	0.054	-0.04964	0.054	5e-05
tRNA-Pro(G3:U70)	YPR019W	MCM4	mcm4-ph	1.1919	0.065	1.23615	0.011	-0.04944	0.065	4e-05
tRNA-Pro(G3:U70)	YLR440C	SEC39	sec39-1	0.94813	0.054	1.01382	0.072	-0.04878	0.054	5e-05
tRNA-Pro(G3:U70)	YGR125W	YGR125W		1.11019	0.031	1.15639	0.083	-0.04872	0.031	1e-05
tRNA-Pro(G3:U70)	YGR172C	YIP1	yip1-4	0.22037	0.043	0.30965	0.16	-0.04868	0.043	0.00202
tRNA-Pro(G3:U70)	YKL022C	CDC16	cdc16-1	1.03491	0.058	1.08365	0.027	-0.04862	0.058	5e-05
tRNA-Pro(G3:U70)	YGR103W	NOP7	nop7-1	0.95267	0.002	0.99954	0.012	-0.04802	0.002	0	status=JK
tRNA-Pro(G3:U70)	YLR347C	KAP95	kap95-l63a	0.93729	0.046	0.98367	0.007	-0.04798	0.046	3e-05
tRNA-Pro(G3:U70)	YLR212C	TUB4	tub4-d	0.83425	0.024	0.88224	0.014	-0.04761	0.024	1e-05
tRNA-Pro(G3:U70)	YAL002W	VPS8		1.05692	0.013	1.10649	0.027	-0.04735	0.013	0
tRNA-Pro(G3:U70)	YML023C	NSE5	nse5-ts2	1.01415	0.013	1.06283	0.009	-0.0467	0.013	6e-05	status=JK
tRNA-Pro(G3:U70)	YOL081W	IRA2		0.84788	0.018	0.89078	0.027	-0.04664	0.018	0
tRNA-Pro(G3:U70)	YJR017C	ESS1	ess1-h164r	0.89407	0.022	0.93401	0.02	-0.04611	0.022	0
tRNA-Pro(G3:U70)	YFR028C	CDC14	cdc14-8	1.14056	0.02	1.18498	0.016	-0.046	0.02	0.00011	status=JK
tRNA-Pro(G3:U70)	YGL045W	RIM8		0.97144	0.046	1.02456	0.061	-0.04563	0.046	3e-05
tRNA-Pro(G3:U70)	YOL123W	HRP1	hrp1-4	0.31261	0.025	0.37038	0.032	-0.04551	0.025	0.00212	status=JK
tRNA-Pro(G3:U70)	YGR172C	YIP1	yip1-40	1.19554	0.007	1.23952	0.023	-0.04537	0.007	1e-05	status=JK
tRNA-Pro(G3:U70)	YPR179C	HDA3		0.98746	0.032	1.03452	0.037	-0.04517	0.032	1e-05
tRNA-Pro(G3:U70)	YFL039C	ACT1	act1-120	0.82239	0.031	0.87144	0.033	-0.04513	0.031	2e-05
tRNA-Pro(G3:U70)	YCL061C	MRC1		1.07273	0.048	1.09236	0.076	-0.04452	0.048	0
tRNA-Pro(G3:U70)	YLR086W	SMC4	smc4-1	0.86797	0.11	0.88633	0.131	-0.04438	0.11	0.00055
tRNA-Pro(G3:U70)	YJL047C	RTT101		1.00908	0.019	1.04836	0.039	-0.04373	0.019	0
tRNA-Pro(G3:U70)	YGR135W	PRE9		1.0145	0.043	1.05442	0.035	-0.04358	0.043	2e-05
tRNA-Pro(G3:U70)	YBR109C	CMD1	cmd1-1	0.93183	0.027	0.97676	0.005	-0.04333	0.027	1e-05
tRNA-Pro(G3:U70)	YJL005W	CYR1	cdc35-1	1.04602	0.028	1.08784	0.031	-0.0433	0.028	1e-05
tRNA-Pro(G3:U70)	YKL173W	SNU114	snu114-60	1.22419	0.061	1.25862	0.017	-0.04286	0.061	3e-05
tRNA-Pro(G3:U70)	YFR037C	RSC8	rsc8-ts21	0.88983	0.012	0.92736	0.031	-0.04286	0.012	6e-05	status=JK
tRNA-Pro(G3:U70)	YHR019C	DED81	ded81-ph	1.19594	0.044	1.24447	0.043	-0.04244	0.044	1e-05
tRNA-Pro(G3:U70)	YBR029C	CDS1	cds1-ph	1.00874	0.015	1.04847	0.035	-0.04243	0.015	7e-05	status=JK
tRNA-Pro(G3:U70)	YDL105W	NSE4	nse4-ts4	0.84487	0.036	0.89236	0.024	-0.04185	0.036	2e-05
tRNA-Pro(G3:U70)	YOR204W	DED1	ded1-199	1.04231	0.094	1.0802	0.012	-0.04184	0.094	0.0002
tRNA-Pro(G3:U70)	YJR043C	POL32		0.99517	0.029	1.04183	0.031	-0.04117	0.029	1e-05
tRNA-Pro(G3:U70)	YIR011C	STS1	sts1-ph	0.7539	0.058	0.75048	0.201	-0.04074	0.058	0.00012
tRNA-Pro(G3:U70)	YBR195C	MSI1		1.13249	0.028	1.14808	0.094	-0.04072	0.028	0
tRNA-Pro(G3:U70)	YNR035C	ARC35	arc35-5	1.0553	0.013	1.09085	0.047	-0.0393	0.013	5e-05	status=JK
tRNA-Pro(G3:U70)	YOR046C	DBP5	dbp5-1	0.03904	0.045	0.06715	0.024	-0.03808	0.045	0.18116
tRNA-Pro(G3:U70)	YKL112W	ABF1	abf1-101	0.9947	0.038	1.03026	0.009	-0.03801	0.038	2e-05
tRNA-Pro(G3:U70)	YGR006W	PRP18	prp18-ts	0.75785	0.029	0.80867	0.056	-0.03777	0.029	0.00048	status=JK
tRNA-Pro(G3:U70)	YGL022W	STT3	stt3-2	0.9297	0.058	0.96287	0.063	-0.03764	0.058	7e-05
tRNA-Pro(G3:U70)	YPL233W	NSL1	nsl1-5	0.84365	0.038	0.87758	0.025	-0.03756	0.038	2e-05
tRNA-Pro(G3:U70)	YFL009W	CDC4	cdc4-3	1.07804	0.061	1.11755	0.006	-0.03701	0.061	5e-05
tRNA-Pro(G3:U70)	YMR033W	ARP9	arp9-1	0.92396	0.034	0.96184	0.025	-0.03696	0.034	1e-05
tRNA-Pro(G3:U70)	YBR234C	ARC40	arc40-ph	1.07025	0.018	1.10297	0.006	-0.03675	0.018	0.0001	status=JK
tRNA-Pro(G3:U70)	YFR037C	RSC8	rsc8-ts16	1.04451	0.104	1.08336	0.049	-0.03648	0.104	0.00027
tRNA-Pro(G3:U70)	YOR259C	RPT4	rpt4-145	1.03427	0.055	1.07075	0.013	-0.03614	0.055	4e-05
tRNA-Pro(G3:U70)	YPR094W	RDS3	rds3-1	1.14391	0.015	1.18599	0.032	-0.03555	0.015	6e-05	status=JK
tRNA-Pro(G3:U70)	YLR316C	TAD3	tad3-ph	0.61577	0.054	0.64818	0.013	-0.03545	0.054	0.00019
tRNA-Pro(G3:U70)	YOL018C	TLG2		0.59256	0.006	0.63588	0.029	-0.0353	0.006	4e-05	status=JK
tRNA-Pro(G3:U70)	YGL001C	ERG26	erg26-1	1.2096	0.069	1.26535	0.073	-0.03517	0.069	5e-05
tRNA-Pro(G3:U70)	YFL039C	ACT1	act1-124	1.12649	0.017	1.15147	0.062	-0.03422	0.017	0
tRNA-Pro(G3:U70)	YMR281W	GPI12	gpi12-ph	0.95473	0.03	0.98469	0.021	-0.03401	0.03	1e-05
tRNA-Pro(G3:U70)	YGR091W	PRP31	prp31-1	1.04896	0.042	1.06852	0.039	-0.03369	0.042	2e-05
tRNA-Pro(G3:U70)	YLR117C	CLF1	clf1-1	0.87647	0.008	0.91033	0.046	-0.0336	0.008	2e-05	status=JK
tRNA-Pro(G3:U70)	YMR277W	FCP1	fcp1-1	1.09526	0.01	1.12266	0.012	-0.03356	0.01	3e-05	status=JK
tRNA-Pro(G3:U70)	YFL039C	ACT1	act1-122	1.05861	0.032	1.08985	0.051	-0.0332	0.032	1e-05
tRNA-Pro(G3:U70)	YDR489W	SLD5	sld5-ph	1.0859	0.039	1.11552	0.031	-0.0331	0.039	1e-05
tRNA-Pro(G3:U70)	YDL102W	POL3	cdc2-1	0.81521	0.023	0.85519	0.015	-0.03307	0.023	1e-05
tRNA-Pro(G3:U70)	YNR043W	MVD1	mvd1-1296	0.79944	0.027	0.83343	0.02	-0.03305	0.027	1e-05
tRNA-Pro(G3:U70)	YOL077C	BRX1	brx1-ph	0.91172	0.017	0.94968	0.039	-0.03299	0.017	0
tRNA-Pro(G3:U70)	YNL061W	NOP2	nop2-4	0.81617	0.018	0.84264	0.052	-0.03273	0.018	0
tRNA-Pro(G3:U70)	YLL002W	RTT109		0.91984	0.05	0.95255	0.037	-0.03266	0.05	4e-05
tRNA-Pro(G3:U70)	YHR191C	CTF8		1.04844	0.034	1.0879	0.036	-0.0324	0.034	1e-05
tRNA-Pro(G3:U70)	YMR235C	RNA1	rna1-1	0.46231	0.093	0.48093	0.059	-0.03227	0.093	0.00217
tRNA-Pro(G3:U70)	YBR079C	RPG1	rpg1-ph	1.02419	0.01	1.05441	0.005	-0.03203	0.01	3e-05	status=JK
tRNA-Pro(G3:U70)	YBL050W	SEC17	sec17-1	0.97174	0.056	1.00535	0.008	-0.03194	0.056	5e-05
tRNA-Pro(G3:U70)	YML114C	TAF8	taf8-7	1.00768	0.019	1.03134	0.031	-0.03177	0.019	0
tRNA-Pro(G3:U70)	YOR244W	ESA1	esa1-l254p	0.70399	0.074	0.73235	0.04	-0.03166	0.074	0.00031
tRNA-Pro(G3:U70)	YDR394W	RPT3	rpt3-1	1.14239	0.039	1.17247	0.031	-0.03152	0.039	1e-05
tRNA-Pro(G3:U70)	YAL025C	MAK16	mak16-ph	0.77539	0.037	0.80945	0.044	-0.03124	0.037	3e-05
tRNA-Pro(G3:U70)	YLR298C	YHC1	yhc1-3	0.36784	0.055	0.40296	0.031	-0.03107	0.055	0.00093
tRNA-Pro(G3:U70)	YML121W	GTR1		0.98564	0.01	1.02246	0.034	-0.03105	0.01	4e-05	status=JK
tRNA-Pro(G3:U70)	YLR342W	FKS1		0.97309	0.029	0.99915	0.024	-0.03069	0.029	1e-05
tRNA-Pro(G3:U70)	YBL034C	STU1	stu1-5	1.16538	0.039	1.19296	0.066	-0.03061	0.039	1e-05
tRNA-Pro(G3:U70)	YLR293C	GSP1	gsp1-p162l	0.87836	0.06	0.90393	0.014	-0.03009	0.06	9e-05
tRNA-Pro(G3:U70)	YFL039C	ACT1	act1-101	1.0362	0.006	1.06747	0.024	-0.03007	0.006	1e-05	status=JK
tRNA-Pro(G3:U70)	YKL045W	PRI2	pri2-1	1.02834	0.019	1.0607	0.011	-0.02977	0.019	0
tRNA-Pro(G3:U70)	YJL050W	MTR4	mtr4-1	1.04282	0.024	1.07181	0.002	-0.02956	0.024	0
tRNA-Pro(G3:U70)	YOL123W	HRP1	hrp1-1	0.57567	0.006	0.60208	0.045	-0.02952	0.006	4e-05	status=JK
tRNA-Pro(G3:U70)	YGR179C	OKP1	okp1-5	1.09793	0.045	1.12366	0.005	-0.0294	0.045	2e-05
tRNA-Pro(G3:U70)	YDL007W	RPT2	rpt2-rf	1.05198	0.041	1.08593	0.035	-0.0291	0.041	2e-05
tRNA-Pro(G3:U70)	YOR085W	OST3		1.14796	0.009	1.17578	0.024	-0.02905	0.009	0
tRNA-Pro(G3:U70)	YBR055C	PRP6	prp6-ts	1.05347	0.084	1.08341	0.035	-0.02901	0.084	0.00014
tRNA-Pro(G3:U70)	YHR007C	ERG11	erg11-td	0.8759	0.018	0.90269	0.01	-0.02883	0.018	0
tRNA-Pro(G3:U70)	YDR311W	TFB1	tfb1-1	0.60866	0.008	0.65677	0.217	-0.02883	0.008	5e-05	status=JK
tRNA-Pro(G3:U70)	YLL035W	GRC3	grc3-ph	0.83446	0.024	0.87538	0.058	-0.02864	0.024	1e-05
tRNA-Pro(G3:U70)	YBR160W	CDC28	cdc28-13	1.02595	0.017	1.05484	0.003	-0.02853	0.017	0
tRNA-Pro(G3:U70)	YFL039C	ACT1	act1-133	0.88216	0.002	0.91059	0.03	-0.02835	0.002	0	status=JK
tRNA-Pro(G3:U70)	YDR091C	RLI1	rli1-ph	1.01748	0.038	1.04355	0.001	-0.02803	0.038	1e-05
tRNA-Pro(G3:U70)	YPL228W	CET1	cet1-1	0.8349	0.039	0.86159	0.009	-0.02788	0.039	3e-05
tRNA-Pro(G3:U70)	YLR103C	CDC45	cdc45-27	1.24663	0.124	1.25274	0.088	-0.02788	0.124	0.00027
tRNA-Pro(G3:U70)	YGR113W	DAM1	dam1-19	0.87795	0.084	0.89813	0.064	-0.02786	0.084	0.00024
tRNA-Pro(G3:U70)	YBR060C	ORC2	orc2-2	1.14231	0.029	1.17276	0.029	-0.02784	0.029	0
tRNA-Pro(G3:U70)	YLR005W	SSL1	ssl1-ph	1.07285	0.031	1.09844	0.008	-0.02772	0.031	1e-05
tRNA-Pro(G3:U70)	YER147C	SCC4	scc4-4	1.03629	0.057	1.05691	0.085	-0.02755	0.057	5e-05
tRNA-Pro(G3:U70)	YMR154C	RIM13		1.01262	0.038	1.03854	0.053	-0.02742	0.038	1e-05
tRNA-Pro(G3:U70)	YNL118C	DCP2	dcp2-7d	0.37333	0.02	0.38767	0.087	-0.02737	0.02	4e-05
tRNA-Pro(G3:U70)	YLR119W	SRN2		1.08042	0.007	1.113	0.064	-0.0271	0.007	1e-05	status=JK
tRNA-Pro(G3:U70)	YDR162C	NBP2		0.8768	0.011	0.90244	0.025	-0.02698	0.011	5e-05	status=JK
tRNA-Pro(G3:U70)	YFL009W	CDC4	cdc4-1	1.06821	0.051	1.09799	0.021	-0.02695	0.051	3e-05
tRNA-Pro(G3:U70)	YDR064W	RPS13	rps13-ph	1.0434	0.015	1.06083	0.014	-0.0269	0.015	7e-05	status=JK
tRNA-Pro(G3:U70)	YHR012W	VPS29		0.92206	0.015	0.94449	0.018	-0.02688	0.015	0
tRNA-Pro(G3:U70)	YBL035C	POL12	pol12-ts	0.94809	0.007	0.96712	0.045	-0.0267	0.007	2e-05	status=JK
tRNA-Pro(G3:U70)	YGL130W	CEG1	ceg1-3	0.71818	0.048	0.74187	0.008	-0.02657	0.048	8e-05
tRNA-Pro(G3:U70)	YBR154C	RPB5	rpb5-ph	1.12897	0.118	1.16033	0.025	-0.02655	0.118	0.00031
tRNA-Pro(G3:U70)	YPL076W	GPI2	gpi2-774	0.99896	0.093	1.0205	0.025	-0.02627	0.093	0.00022
tRNA-Pro(G3:U70)	YDL103C	QRI1	qri1-ph	0.28134	0.03	0.35654	0.181	-0.02619	0.03	0.00374	status=JK
tRNA-Pro(G3:U70)	YPR070W	MED1		0.66264	0.005	0.67097	0.03	-0.0259	0.005	2e-05	status=JK
tRNA-Pro(G3:U70)	YLR314C	CDC3	cdc3-3	1.20999	0.074	1.23772	0.011	-0.02544	0.074	6e-05
tRNA-Pro(G3:U70)	YOR070C	GYP1		0.95124	0.015	0.96979	0.047	-0.02534	0.015	0
tRNA-Pro(G3:U70)	YFL039C	ACT1	act1-132	1.08826	0.058	1.13435	0.056	-0.02525	0.058	4e-05
tRNA-Pro(G3:U70)	YPR060C	ARO7		1.07677	0.088	1.09024	0.118	-0.02513	0.087	0.00015
tRNA-Pro(G3:U70)	YDR361C	BCP1	bcp1-ts	0.76849	0.055	0.78967	0.033	-0.02504	0.055	0.0001
tRNA-Pro(G3:U70)	YIL062C	ARC15	arc15-10	1.03988	0.07	1.0553	0.047	-0.0249	0.07	9e-05
tRNA-Pro(G3:U70)	YER171W	RAD3	rad3-ts14	0.1169	0.022	0.11691	0.107	-0.02489	0.022	0.00187
tRNA-Pro(G3:U70)	YPR055W	SEC8	sec8-6	1.08327	0.011	1.10106	0.067	-0.0248	0.011	4e-05	status=JK
tRNA-Pro(G3:U70)	YLR196W	PWP1	pwp1-ph	0.79906	0.03	0.82364	0.027	-0.02471	0.03	1e-05
tRNA-Pro(G3:U70)	YKR083C	DAD2	dad2-9	1.15438	0.041	1.18087	0.007	-0.02462	0.041	1e-05
tRNA-Pro(G3:U70)	YDR201W	SPC19	spc19-ph	1.09726	0.072	1.12934	0.099	-0.02447	0.072	8e-05
tRNA-Pro(G3:U70)	YLR105C	SEN2	sen2-1	1.00699	0.041	1.02878	0.004	-0.0244	0.041	2e-05
tRNA-Pro(G3:U70)	YDL003W	MCD1	mcd1-73	0.95653	0.026	0.97636	0.041	-0.02423	0.026	1e-05
tRNA-Pro(G3:U70)	YDR145W	TAF12	taf12-9	0.97168	0.062	0.99336	0.008	-0.02414	0.062	7e-05
tRNA-Pro(G3:U70)	YIL150C	MCM10	mcm10-43	0.80528	0.015	0.82379	0.022	-0.02394	0.015	0.00012	status=JK
tRNA-Pro(G3:U70)	YIL046W	MET30	met30-9	1.04021	0.046	1.08112	0.042	-0.02384	0.046	2e-05
tRNA-Pro(G3:U70)	YGR113W	DAM1	dam1-5	1.07319	0.012	1.08966	0.033	-0.0236	0.012	4e-05	status=JK
tRNA-Pro(G3:U70)	YML023C	NSE5	nse5-ts3	0.97241	0.036	0.99208	0.01	-0.0235	0.036	1e-05
tRNA-Pro(G3:U70)	YDR331W	GPI8	gpi8-ts	0.89135	0.048	0.91682	0.036	-0.02315	0.047	4e-05
tRNA-Pro(G3:U70)	YGL098W	USE1	use1-ts	1.18164	0.049	1.2055	0.042	-0.02307	0.049	2e-05
tRNA-Pro(G3:U70)	YBR237W	PRP5	prp5-1	0.92478	0.048	0.94734	0.031	-0.02305	0.048	4e-05
tRNA-Pro(G3:U70)	YLL004W	ORC3	orc3-70	0.97691	0.051	0.99269	0.039	-0.02298	0.051	4e-05
tRNA-Pro(G3:U70)	YLR459W	GAB1	gab1-3	1.05233	0.003	1.07135	0.032	-0.02275	0.003	0	status=JK
tRNA-Pro(G3:U70)	YFL013C	IES1		0.88269	0.164	0.93793	0.066	-0.02262	0.163	0.0017
tRNA-Pro(G3:U70)	YLR457C	NBP1	nbp1-1	1.30935	0.012	1.32659	0.014	-0.02252	0.012	0
tRNA-Pro(G3:U70)	YER147C	SCC4	yer147c-ph	1.05248	0.016	1.07622	0.017	-0.02244	0.016	0
tRNA-Pro(G3:U70)	YBR211C	AME1	ame1-4	1.13401	0.015	1.15356	0.021	-0.02237	0.015	0
tRNA-Pro(G3:U70)	YMR213W	CEF1	cef1-13	1.10065	0.035	1.12531	0.011	-0.02216	0.035	1e-05
tRNA-Pro(G3:U70)	YGR274C	TAF1	taf1-2	0.89985	0.01	0.91678	0.016	-0.02204	0.01	0
tRNA-Pro(G3:U70)	YDR145W	TAF12	taf12-l446a	0.85845	0.041	0.87922	0.025	-0.02176	0.041	3e-05
tRNA-Pro(G3:U70)	YKR086W	PRP16	prp16-2	1.05801	0.044	1.07755	0.013	-0.02164	0.044	2e-05
tRNA-Pro(G3:U70)	YHR118C	ORC6	orc6-ph	0.79708	0.02	0.82166	0.039	-0.02161	0.02	0.00022	status=JK
tRNA-Pro(G3:U70)	YFL039C	ACT1	act1-119	1.10564	0.02	1.12475	0.019	-0.02159	0.02	0
tRNA-Pro(G3:U70)	YBR221C	PDB1		1.01312	0.031	1.03619	0.019	-0.0214	0.031	1e-05
tRNA-Pro(G3:U70)	YER125W	RSP5	rsp5-1	0.73422	0.035	0.75717	0.028	-0.02126	0.035	3e-05
tRNA-Pro(G3:U70)	YBR079C	RPG1	rpg1-1	1.05719	0.035	1.08582	0.031	-0.02124	0.035	1e-05
tRNA-Pro(G3:U70)	YHR196W	UTP9	utp9-ph	0.82541	0.023	0.84438	0.028	-0.02118	0.023	1e-05
tRNA-Pro(G3:U70)	YDR150W	NUM1		1.29124	0.108	1.30656	0.01	-0.02118	0.108	0.00016
tRNA-Pro(G3:U70)	YCL061C	MRC1		1.0268	0.045	1.04484	0.01	-0.02115	0.044	2e-05
tRNA-Pro(G3:U70)	YLR186W	EMG1	emg1-1	0.91344	0.059	0.92973	0.035	-0.02105	0.059	7e-05
tRNA-Pro(G3:U70)	YJL168C	SET2		0.9252	0.03	0.94391	0.019	-0.02104	0.03	1e-05
tRNA-Pro(G3:U70)	YJR057W	CDC8	cdc8-2	0.69399	0.014	0.71154	0.006	-0.02071	0.014	0
tRNA-Pro(G3:U70)	YDR437W	GPI19	gpi19-2	0.88341	0.028	0.90451	0.022	-0.0206	0.028	1e-05
tRNA-Pro(G3:U70)	YER083C	GET2		1.01756	0.041	1.03597	0.042	-0.02015	0.041	2e-05
tRNA-Pro(G3:U70)	YGR156W	PTI1	pti1-ts1	1.0878	0.068	1.12917	0.123	-0.01948	0.068	7e-05
tRNA-Pro(G3:U70)	YGL075C	MPS2	mps2-2	0.23557	0.084	0.2558	0.075	-0.01893	0.084	0.01115
tRNA-Pro(G3:U70)	YOR326W	MYO2	myo2-14	1.01506	0.037	1.0292	0.021	-0.01886	0.037	1e-05
tRNA-Pro(G3:U70)	YIR006C	PAN1	pan1-4	0.94426	0.054	0.94966	0.051	-0.0188	0.054	5e-05
tRNA-Pro(G3:U70)	YLR056W	ERG3		0.89361	0.039	0.91595	0.054	-0.01876	0.039	2e-05
tRNA-Pro(G3:U70)	YGR113W	DAM1	dam1-9	0.97917	0.083	0.99453	0.068	-0.01874	0.083	0.00017
tRNA-Pro(G3:U70)	YKR008W	RSC4	rsc4-2	0.9583	0.01	0.97434	0.024	-0.01872	0.01	4e-05	status=JK
tRNA-Pro(G3:U70)	YFL039C	ACT1	act1-125	0.92585	0.025	0.94722	0.015	-0.01857	0.025	1e-05
tRNA-Pro(G3:U70)	YPR176C	BET2	bet2-1	0.9346	0.012	0.95027	0.027	-0.01831	0.012	6e-05	status=JK
tRNA-Pro(G3:U70)	YMR304W	UBP15		1.1897	0.003	1.20936	0.005	-0.01801	0.003	0	status=JK
tRNA-Pro(G3:U70)	YLR317W	YLR317W	ylr317w-ph	0.80969	0.024	0.82638	0.012	-0.01799	0.024	1e-05
tRNA-Pro(G3:U70)	YLL003W	SFI1	sfi1-3	1.15198	0.068	1.16608	0.08	-0.01784	0.068	6e-05
tRNA-Pro(G3:U70)	YDR158W	HOM2		1.04652	0.017	1.06057	0.02	-0.01774	0.017	9e-05	status=JK
tRNA-Pro(G3:U70)	YGL255W	ZRT1		1.14485	0.1	1.16058	0.023	-0.01736	0.1	0.00018
tRNA-Pro(G3:U70)	YPL076W	GPI2	gpi2-1-7b	0.89754	0.082	0.91034	0.061	-0.01733	0.081	0.0002
tRNA-Pro(G3:U70)	YGL047W	ALG13	alg13-ph	1.17862	0.021	1.20388	0.035	-0.01723	0.021	0
tRNA-Pro(G3:U70)	YGR013W	SNU71	snu71-ph	1.23051	0.007	1.2457	0.027	-0.01723	0.007	1e-05	status=JK
tRNA-Pro(G3:U70)	YJL035C	TAD2	tad2-ph	1.15897	0.035	1.16811	0.039	-0.01704	0.035	1e-05
tRNA-Pro(G3:U70)	YGL066W	SGF73		0.91876	0.063	0.94537	0.047	-0.01691	0.063	9e-05
tRNA-Pro(G3:U70)	YOL139C	CDC33	cdc33-e72g	0.8153	0.031	0.82801	0.028	-0.01648	0.031	2e-05
tRNA-Pro(G3:U70)	YBR142W	MAK5	mak5-ph	0.67456	0.04	0.6947	0.007	-0.01644	0.04	0.00116	status=JK
tRNA-Pro(G3:U70)	YBR236C	ABD1	abd1-8	0.99112	0.039	1.0047	0.039	-0.01641	0.039	2e-05
tRNA-Pro(G3:U70)	YPL255W	BBP1	bbp1-2	0.00209	0.002	0.01779	0.009	-0.01624	0.002	0.23641	status=JK
tRNA-Pro(G3:U70)	YDR049W	VMS1		1.09098	0.041	1.10561	0.045	-0.01605	0.041	2e-05
tRNA-Pro(G3:U70)	YIL109C	SEC24	sec24-20	0.96282	0.018	0.97513	0.023	-0.01562	0.018	0
tRNA-Pro(G3:U70)	YKR022C	NTR2	ykr022c-ph	0.97884	0.023	0.98759	0.026	-0.01561	0.023	0
tRNA-Pro(G3:U70)	YJR068W	RFC2	rfc2-1	1.01853	0.092	1.04133	0.053	-0.01529	0.092	0.0002
tRNA-Pro(G3:U70)	YPR016C	TIF6	tif6-ts1	0.85036	0.037	0.86591	0.043	-0.01523	0.037	2e-05
tRNA-Pro(G3:U70)	YJL115W	ASF1		0.93741	0.005	0.95407	0.011	-0.01498	0.005	1e-05	status=JK
tRNA-Pro(G3:U70)	YPR016C	TIF6	tif6-ts4	1.01859	0.046	1.0363	0.021	-0.01494	0.046	3e-05
tRNA-Pro(G3:U70)	YPR135W	CTF4		0.9146	0.019	0.97018	0.189	-0.01467	0.019	0.00014	status=JK
tRNA-Pro(G3:U70)	YMR229C	RRP5	rrp5-delta6	0.92836	0.084	0.94205	0.033	-0.01421	0.084	0.00021
tRNA-Pro(G3:U70)	YGR091W	PRP31	prp31-ts	1.01098	0.011	1.02436	0.032	-0.0142	0.011	0
tRNA-Pro(G3:U70)	YOR103C	OST2	ost2-ph	0.15961	0.045	0.16313	0.057	-0.01401	0.045	0.0058
tRNA-Pro(G3:U70)	YBR265W	TSC10	tsc10-1	1.02489	0.019	1.03525	0.024	-0.0136	0.019	0
tRNA-Pro(G3:U70)	YLR088W	GAA1	gaa1-ts	1.24972	0.01	1.26531	0.037	-0.01356	0.01	0
tRNA-Pro(G3:U70)	YPL124W	SPC29	spc29-3	0.67253	0.172	0.70026	0.18	-0.01349	0.172	0.00433
tRNA-Pro(G3:U70)	YGR081C	SLX9		0.99842	0.032	1.01805	0.046	-0.01347	0.032	1e-05
tRNA-Pro(G3:U70)	YDR527W	RBA50	rba50-ph	0.93241	0.04	0.94367	0.042	-0.01342	0.04	2e-05
tRNA-Pro(G3:U70)	YDR510W	SMT3	smt3-331	0.85197	0.08	0.8657	0.027	-0.0134	0.08	0.00023
tRNA-Pro(G3:U70)	YMR268C	PRP24	prp24-ts	1.33396	0.062	1.34333	0.022	-0.01337	0.062	3e-05
tRNA-Pro(G3:U70)	YLR291C	GCD7	gcd7-ph	1.11638	0.034	1.12151	0.034	-0.01331	0.034	1e-05
tRNA-Pro(G3:U70)	YAL041W	CDC24	cdc24-2	1.21844	0.013	1.23429	0.009	-0.01307	0.012	0
tRNA-Pro(G3:U70)	YJL203W	PRP21	prp21-ts	0.82399	0.019	0.82323	0.024	-0.0129	0.019	0
tRNA-Pro(G3:U70)	YFL034C-B	MOB2	mob2-38	0.95203	0.079	0.96828	0.047	-0.01279	0.079	0.00016
tRNA-Pro(G3:U70)	YFL031W	HAC1		0.63883	0.051	0.66262	0.093	-0.0126	0.051	0.00014
tRNA-Pro(G3:U70)	YDR062W	LCB2	lcb2-2	0.31328	0.015	0.32748	0.006	-0.01235	0.014	3e-05
tRNA-Pro(G3:U70)	YML032C	RAD52		0.90657	0.016	0.91885	0.031	-0.01231	0.016	0
tRNA-Pro(G3:U70)	YAL038W	CDC19	cdc19-1	1.0826	0.003	1.09179	0.006	-0.01217	0.003	0	status=JK
tRNA-Pro(G3:U70)	YOR244W	ESA1	esa1-d414	0.9835	0.003	0.98713	0.037	-0.01217	0.003	0	status=JK
tRNA-Pro(G3:U70)	YDL103C	QRI1	qri1-ts1	1.09679	0.027	1.10115	0.05	-0.01209	0.027	0
tRNA-Pro(G3:U70)	YKL176C	LST4		1.00032	0.071	1.00995	0.016	-0.01181	0.071	0.0001
tRNA-Pro(G3:U70)	YPL020C	ULP1	ulp1-333	1.03845	0.061	1.03431	0.079	-0.01166	0.061	6e-05
tRNA-Pro(G3:U70)	YNR035C	ARC35	arc35-6	1.11391	0.013	1.11464	0.042	-0.01156	0.013	4e-05	status=JK
tRNA-Pro(G3:U70)	YCR002C	CDC10	cdc10-4	1.10624	0.02	1.11292	0.028	-0.01139	0.02	0
tRNA-Pro(G3:U70)	YPL010W	RET3	ret3-1	1.18844	0.029	1.18473	0.046	-0.01117	0.029	0.00019	status=JK
tRNA-Pro(G3:U70)	YDR188W	CCT6	cct6-18	0.91263	0.015	0.92222	0.001	-0.01102	0.015	0
tRNA-Pro(G3:U70)	YNL061W	NOP2	nop2-9	0.5937	0.028	0.60559	0.021	-0.01088	0.028	3e-05
tRNA-Pro(G3:U70)	YHR036W	BRL1	brl1-2221	1.09095	0.065	1.10122	0.059	-0.01083	0.065	6e-05
tRNA-Pro(G3:U70)	YOR075W	UFE1	ufe1-1	1.1416	0.093	1.14834	0.135	-0.01009	0.093	0.00015
tRNA-Pro(G3:U70)	YDR454C	GUK1	guk1-ph	0.67186	0.113	0.65736	0.084	-0.01009	0.113	0.00128
tRNA-Pro(G3:U70)	YFR032C-A	RPL29		0.97435	0.008	0.99099	0.03	-0.01003	0.008	2e-05	status=JK
tRNA-Pro(G3:U70)	YOR030W	DFG16		0.94693	0.027	0.94822	0.029	-0.00987	0.027	1e-05
tRNA-Pro(G3:U70)	YMR049C	ERB1	erb1-ph	0.93308	0.024	0.94437	0.035	-0.00969	0.024	0
tRNA-Pro(G3:U70)	YGR092W	DBF2	dbf2-3	0.97673	0.01	0.98484	0.032	-0.00958	0.01	3e-05	status=JK
tRNA-Pro(G3:U70)	YJR064W	CCT5	yjr064w-ph	1.04122	0.061	1.05054	0.033	-0.0093	0.061	6e-05
tRNA-Pro(G3:U70)	YKL193C	SDS22	sds22-6	1.09225	0.049	1.09755	0.064	-0.00873	0.049	2e-05
tRNA-Pro(G3:U70)	YPL235W	RVB2	rvb2-ph	1.12214	0.024	1.12816	0.029	-0.0082	0.024	0
tRNA-Pro(G3:U70)	YOR232W	MGE1	mge1-100	1.08764	0.025	1.10798	0.051	-0.00798	0.025	0
tRNA-Pro(G3:U70)	YGL247W	BRR6	brr6-ph	1.13291	0.131	1.13997	0.096	-0.00784	0.131	0.00043
tRNA-Pro(G3:U70)	YDL105W	NSE4	nse4-ph	0.87763	0.13	0.86652	0.106	-0.00748	0.13	0.00728	status=JK
tRNA-Pro(G3:U70)	YDR081C	PDC2	ydr081c-ph	0.17144	0.021	0.18405	0.029	-0.00747	0.021	0.00485	status=JK
tRNA-Pro(G3:U70)	YOR151C	RPB2	rpb2-6	0.55982	0.007	0.56647	0.036	-0.00732	0.007	0
tRNA-Pro(G3:U70)	YML046W	PRP39	prp39-1	1.15078	0.023	1.16311	0.057	-0.00732	0.023	0.00014	status=JK
tRNA-Pro(G3:U70)	YOR149C	SMP3	smp3-1	1.08793	0.074	1.11035	0.032	-0.00709	0.074	9e-05
tRNA-Pro(G3:U70)	YDR238C	SEC26	sec26-11d26	1.17193	0.026	1.17183	0.027	-0.007	0.026	0
tRNA-Pro(G3:U70)	YDR118W	APC4	apc4-ph	1.10431	0.03	1.10875	0.023	-0.00693	0.03	1e-05
tRNA-Pro(G3:U70)	YPL204W	HRR25	hrr25-ph	0.92009	0.048	0.93568	0.042	-0.00692	0.048	4e-05
tRNA-Pro(G3:U70)	YOR249C	APC5	apc5-ca	1.09238	0.073	1.10054	0.014	-0.00682	0.073	8e-05
tRNA-Pro(G3:U70)	YMR078C	CTF18		0.92072	0.077	0.93157	0.031	-0.00677	0.077	0.00016
tRNA-Pro(G3:U70)	YLR007W	NSE1	nse1-16	0.8632	0.057	0.87325	0.045	-0.00665	0.057	8e-05
tRNA-Pro(G3:U70)	YPR082C	DIB1	ypr082c-ph	1.03187	0.016	1.0361	0.003	-0.00657	0.016	0
tRNA-Pro(G3:U70)	YJR074W	MOG1		1.14926	0.033	1.1502	0.029	-0.00651	0.033	1e-05
tRNA-Pro(G3:U70)	YPR103W	PRE2	pre2-75	1.05741	0.006	1.07203	0.097	-0.00626	0.006	1e-05	status=JK
tRNA-Pro(G3:U70)	YCL010C	SGF29		1.04076	0.009	1.04618	0.012	-0.00585	0.009	0
tRNA-Pro(G3:U70)	YML069W	POB3	pob3-q308k	0.14596	0.004	0.14998	0.005	-0.00549	0.004	0.0002	status=JK
tRNA-Pro(G3:U70)	YJL085W	EXO70	exo70-38	1.17205	0.041	1.18489	0.041	-0.00546	0.041	1e-05
tRNA-Pro(G3:U70)	YLR347C	KAP95	kap95-e126k	1.10347	0.03	1.10979	0.018	-0.00539	0.03	1e-05
tRNA-Pro(G3:U70)	YLR229C	CDC42	cdc42-1	1.15664	0.007	1.1627	0.048	-0.0052	0.007	1e-05	status=JK
tRNA-Pro(G3:U70)	YDL028C	MPS1	mps1-417	1.01465	0.039	1.01949	0.007	-0.00509	0.039	2e-05
tRNA-Pro(G3:U70)	YBL040C	ERD2	erd2-ph	1.03304	0.066	1.02989	0.073	-0.00474	0.066	7e-05
tRNA-Pro(G3:U70)	YJL001W	PRE3	pre3-2	1.17464	0.003	1.18016	0.011	-0.00445	0.003	0	status=JK
tRNA-Pro(G3:U70)	YFL039C	ACT1	act1-159	0.88294	0.035	0.89281	0.034	-0.00416	0.035	2e-05
tRNA-Pro(G3:U70)	YKL173W	SNU114	snu114-40	1.09578	0.017	1.09818	0.007	-0.00409	0.017	0
tRNA-Pro(G3:U70)	YGR274C	TAF1	taf1-1	1.03933	0.032	1.03689	0.012	-0.00403	0.032	1e-05
tRNA-Pro(G3:U70)	YKL069W	YKL069W		0.99597	0.047	1.00888	0.032	-0.00399	0.047	3e-05
tRNA-Pro(G3:U70)	YFL034C-B	MOB2	mob2-40	1.03127	0.025	1.02368	0.026	-0.00389	0.025	0.00019	status=JK
tRNA-Pro(G3:U70)	YHR190W	ERG9	erg9-ph	1.01557	0.036	1.01854	0.06	-0.00388	0.036	1e-05
tRNA-Pro(G3:U70)	YAR019C	CDC15	cdc15-1	1.09193	0.003	1.09638	0.022	-0.00352	0.003	0	status=JK
tRNA-Pro(G3:U70)	YGL207W	SPT16	spt16-ts	0.91235	0.039	0.91487	0.017	-0.00342	0.039	2e-05
tRNA-Pro(G3:U70)	YDR416W	SYF1	ydr416w-ph	1.01306	0.033	1.01054	0.025	-0.00315	0.033	1e-05
tRNA-Pro(G3:U70)	YDR434W	GPI17	gpi17-ph	1.16659	0.04	1.16784	0.022	-0.00314	0.04	1e-05
tRNA-Pro(G3:U70)	YGL174W	BUD13		1.03283	0.012	1.04174	0.018	-0.003	0.012	4e-05	status=JK
tRNA-Pro(G3:U70)	YOR275C	RIM20		0.98361	0.062	1.01095	0.084	-0.00273	0.062	7e-05
tRNA-Pro(G3:U70)	YDR339C	FCF1	fcf1-ph	0.92484	0.016	0.92961	0.007	-0.00257	0.016	0
tRNA-Pro(G3:U70)	YBR057C	MUM2		1.12319	0.025	1.12379	0.008	-0.00239	0.025	0
tRNA-Pro(G3:U70)	YMR240C	CUS1	cus1-3	1.15813	0.116	1.15718	0.089	-0.0022	0.116	0.00028
tRNA-Pro(G3:U70)	YLR087C	CSF1		1.08772	0.023	1.0763	0.06	-0.00216	0.023	0.00015	status=JK
tRNA-Pro(G3:U70)	YGL245W	GUS1	gus1-ph	1.11889	0.018	1.12212	0.009	-0.0021	0.018	0
tRNA-Pro(G3:U70)	YHR036W	BRL1	brl1-c371r	1.31698	0.012	1.31604	0.026	-0.00191	0.012	3e-05	status=JK
tRNA-Pro(G3:U70)	YKL213C	DOA1		1.16275	0.032	1.15553	0.034	-0.00173	0.032	1e-05
tRNA-Pro(G3:U70)	YLR066W	SPC3	spc3-4	1.19449	0.019	1.19352	0.01	-0.00134	0.019	9e-05	status=JK
tRNA-Pro(G3:U70)	YHR186C	KOG1	kog1-1	1.10076	0.024	1.10363	0.049	-0.00123	0.024	0
tRNA-Pro(G3:U70)	YDR002W	YRB1	yrb1-51	1.12603	0.014	1.1306	0.019	-0.00107	0.014	0
tRNA-Pro(G3:U70)	YPR023C	EAF3		1.14309	0.073	1.14338	0.01	-0.00106	0.073	7e-05
tRNA-Pro(G3:U70)	YKL197C	PEX1		0.98357	0.009	0.97908	0.023	-0.00078	0.009	3e-05	status=JK
tRNA-Pro(G3:U70)	YDL043C	PRP11	prp11-ts	0.94406	0.007	0.94854	0.024	-0.00076	0.007	0
tRNA-Pro(G3:U70)	YNL102W	POL1	pol1-12	1.11673	0.082	1.10998	0.015	-0.00075	0.082	0.00011
tRNA-Pro(G3:U70)	YOR122C	PFY1	pfy1-13	0.93232	0.01	0.93154	0.008	-0.00041	0.01	4e-05	status=JK
tRNA-Pro(G3:U70)	YGR229C	SMI1		0.98808	0.015	0.98608	0.007	-0.00018	0.015	0
tRNA-Pro(G3:U70)	YMR205C	PFK2		0	0	0	0	0	0	#NUM!	status=JK
tRNA-Pro(G3:U70)	YJL173C	RFA3	rfa3-313	0	0	0	0	0	0	#NUM!
tRNA-Pro(G3:U70)	YOR257W	CDC31	cdc31-1	0	0	0	0	0	0	#NUM!
tRNA-Pro(G3:U70)	YFL022C	FRS2	frs2-ph	0	0	0	0	0	0	#NUM!
tRNA-Pro(G3:U70)	YOR244W	ESA1	esa1-1851	0	0	0.01672	0.029	0	0	#NUM!	status=JK
tRNA-Pro(G3:U70)	YOR329C	SCD5	scd5-d338	0	0	0	0	0	0	#NUM!
tRNA-Pro(G3:U70)	YDL008W	APC11	apc11-22	0	0	0.0001	0	0	0	#NUM!	status=JK
tRNA-Pro(G3:U70)	YOR249C	APC5	apc5-ca-paps	0	0	0	0	0	0	#NUM!
tRNA-Pro(G3:U70)	YKL203C	TOR2	tor2-29	0	0	0	0	0	0	#NUM!	status=JK
tRNA-Pro(G3:U70)	YJR065C	ARP3	arp3-h161a	0	0	0	0	0	0	#NUM!	status=JK
tRNA-Pro(G3:U70)	YDR054C	CDC34	cdc34-2	0	0	0	0	0	0	#NUM!
tRNA-Pro(G3:U70)	YDR145W	TAF12	taf12-l464a	0	0	0	0	0	0	#NUM!	status=JK
tRNA-Pro(G3:U70)	YDL030W	PRP9	prp9-1	0	0	0	0	0	0	#NUM!
tRNA-Pro(G3:U70)	YMR001C	CDC5	cdc5-1	0	0	0	0	0	0	#NUM!	status=JK
tRNA-Pro(G3:U70)	YJL019W	MPS3	mps3-7	0	0	0	0	0	0	#NUM!
tRNA-Pro(G3:U70)	YER168C	CCA1	cca1-1	0	0	0	0	0	0	#NUM!
tRNA-Pro(G3:U70)	YPR161C	SGV1	sgv1-80	0	0	0	0	0	0	#NUM!
tRNA-Pro(G3:U70)	YBR049C	REB1	reb1-ph	0	0	0	0	0	0	#NUM!
tRNA-Pro(G3:U70)	YDL028C	MPS1	mps1-6	0	0	0	0	0	0	#NUM!
tRNA-Pro(G3:U70)	YOR329C	SCD5	scd5-pp1d2	0	0	0	0	0	0	#NUM!
tRNA-Pro(G3:U70)	YDR292C	SRP101	srp101-47	0	0	0	0	0	0	#NUM!	status=JK
tRNA-Pro(G3:U70)	YHR036W	BRL1	brl1-c371s	1.18826	0.024	1.18676	0.002	0.00015	0.024	0
tRNA-Pro(G3:U70)	YNL061W	NOP2	nop2-10	0.00023	0	0	0	0.00023	0	0.42265	status=JK
tRNA-Pro(G3:U70)	YMR094W	CTF13	ctf13-30	1.22174	0.074	1.22624	0.016	0.00027	0.074	6e-05
tRNA-Pro(G3:U70)	YNL061W	NOP2	nop2-6	0.9796	0.03	0.96531	0.075	0.00035	0.03	1e-05
tRNA-Pro(G3:U70)	YBL097W	BRN1	brn1-16	1.10546	0.047	1.10384	0.003	0.00038	0.047	2e-05
tRNA-Pro(G3:U70)	YOR181W	LAS17	las17-13	0.00044	0	0.00591	0.01	0.00044	0	0.26613	status=JK
tRNA-Pro(G3:U70)	YMR271C	URA10		1.01321	0.088	1.01312	0.083	0.0005	0.088	0	status=JK;status=BG
tRNA-Pro(G3:U70)	YJR065C	ARP3	arp3-f306g	1.14105	0.132	1.11435	0.232	0.00057	0.132	0.00042
tRNA-Pro(G3:U70)	YOR057W	SGT1	sgt1-5	1.01386	0.07	1.0088	0.049	0.00062	0.07	9e-05
tRNA-Pro(G3:U70)	YBL034C	STU1	stu1-12	0.98932	0.018	0.98287	0.035	0.00067	0.018	0
tRNA-Pro(G3:U70)	YGR140W	CBF2	cbf2-42	1.14066	0.002	1.13397	0.044	0.00074	0.002	0	status=JK
tRNA-Pro(G3:U70)	YGR092W	DBF2	dbf2-1	1.03974	0.032	1.03692	0.033	0.00077	0.032	1e-05
tRNA-Pro(G3:U70)	YFL034C-B	MOB2	mob2-26	0.65694	0.004	0.66106	0.036	0.00115	0.004	1e-05	status=JK
tRNA-Pro(G3:U70)	YBR131W	CCZ1		0.86977	0.016	0.86774	0.013	0.00123	0.016	0
tRNA-Pro(G3:U70)	YOR035C	SHE4		1.08258	0.05	1.07876	0.044	0.00151	0.05	3e-05
tRNA-Pro(G3:U70)	YKL196C	YKT6	ykt6-ph	0.99076	0.056	0.99597	0.052	0.00157	0.056	5e-05
tRNA-Pro(G3:U70)	YPL128C	TBF1	tbf1-ph	0.96583	0.012	0.94916	0.058	0.00162	0.012	5e-05	status=JK
tRNA-Pro(G3:U70)	YJL039C	NUP192	nup192-15	0.97764	0.005	0.97197	0.04	0.0019	0.005	1e-05	status=JK
tRNA-Pro(G3:U70)	YDL028C	MPS1	mps1-1	0.18256	0.009	0.16979	0.107	0.00191	0.009	0.00086	status=JK
tRNA-Pro(G3:U70)	YGL092W	NUP145	nup145-r4	1.09394	0.049	1.08599	0.056	0.00256	0.049	2e-05
tRNA-Pro(G3:U70)	YGR122W	YGR122W		0.00257	0.004	0	0	0.00257	0.004	0.42265	status=JK
tRNA-Pro(G3:U70)	YDR228C	PCF11	pcf11-ts9	1.07672	0.06	1.07863	0.071	0.00302	0.059	5e-05
tRNA-Pro(G3:U70)	YGR099W	TEL2	tel2-7	1.22105	0.023	1.21607	0.013	0.00363	0.023	0
tRNA-Pro(G3:U70)	YJR072C	NPA3	npa3-ph	1.20012	0.065	1.1896	0.064	0.00369	0.065	4e-05
tRNA-Pro(G3:U70)	YOR257W	CDC31	cdc31-2	0.00379	0.007	0	0	0.00379	0.007	0.42265	status=JK
tRNA-Pro(G3:U70)	YGR140W	CBF2	cbf2-1	1.07783	0.04	1.07495	0.024	0.00394	0.04	1e-05
tRNA-Pro(G3:U70)	YMR236W	TAF9	taf9-ts2	1.05176	0.061	1.06428	0.068	0.00413	0.061	5e-05
tRNA-Pro(G3:U70)	YMR271C	URA10		1.02421	0.111	1.01937	0.077	0.00414	0.111	0	status=JK;status=BG
tRNA-Pro(G3:U70)	YGR099W	TEL2	tel2-15	1.12589	0.017	1.12137	0.006	0.0042	0.017	0
tRNA-Pro(G3:U70)	YBR253W	SRB6	srb6-ph	1.15176	0.059	1.14491	0.035	0.0043	0.059	4e-05
tRNA-Pro(G3:U70)	YMR271C	URA10		1.01821	0.085	1.01955	0.076	0.00451	0.085	0	status=JK
tRNA-Pro(G3:U70)	YLR397C	AFG2	afg2-18	0.91059	0.002	0.90804	0.011	0.00457	0.002	0	status=JK
tRNA-Pro(G3:U70)	YML064C	TEM1	tem1-3	1.16351	0.06	1.16849	0.09	0.00463	0.06	4e-05
tRNA-Pro(G3:U70)	YFL034C-B	MOB2	mob2-34	0.86601	0.038	0.86042	0.022	0.00465	0.038	2e-05
tRNA-Pro(G3:U70)	YJR076C	CDC11	cdc11-2	0.86666	0.007	0.86964	0.037	0.00465	0.007	2e-05	status=JK
tRNA-Pro(G3:U70)	YGL145W	TIP20	tip20-5	1.08142	0.017	1.0766	0.004	0.00474	0.017	0
tRNA-Pro(G3:U70)	YFL008W	SMC1	smc1-2	0.8947	0.048	0.88417	0.069	0.00508	0.048	4e-05
tRNA-Pro(G3:U70)	YNL061W	NOP2	nop2-3	0.89609	0.03	0.88948	0.051	0.00509	0.03	1e-05
tRNA-Pro(G3:U70)	YPR085C	ASA1	ypr085c-ph	0.88439	0.073	0.87478	0.03	0.00535	0.073	0.00015
tRNA-Pro(G3:U70)	YDL065C	PEX19		1.19936	0.058	1.18047	0.039	0.0054	0.058	3e-05
tRNA-Pro(G3:U70)	YHR101C	BIG1	big1-ph	1.17948	0.023	1.17738	0.031	0.00544	0.023	0
tRNA-Pro(G3:U70)	YIR005W	IST3		1.07115	0.018	1.06992	0.029	0.0055	0.018	0
tRNA-Pro(G3:U70)	YNL102W	POL1	pol1-2	0.40448	0.302	0.39645	0.326	0.00552	0.302	0.07511
tRNA-Pro(G3:U70)	YIR008C	PRI1	pri1-m4	0.79682	0.039	0.78648	0.014	0.00574	0.039	3e-05
tRNA-Pro(G3:U70)	YGL163C	RAD54		0.98756	0.013	0.98172	0.017	0.0061	0.013	0
tRNA-Pro(G3:U70)	YOR074C	CDC21	cdc21-ts	1.17585	0.013	1.1694	0.012	0.0061	0.013	0
tRNA-Pro(G3:U70)	YDR236C	FMN1	ydr236c-ph	0.87673	0.03	0.87356	0.011	0.00621	0.03	0.00039	status=JK
tRNA-Pro(G3:U70)	YKL028W	TFA1	tfa1-21	1.11751	0.018	1.11145	0.004	0.00626	0.018	0
tRNA-Pro(G3:U70)	YER136W	GDI1	gdi1-1	0.56866	0.096	0.54141	0.098	0.00629	0.095	0.00127
tRNA-Pro(G3:U70)	YGL151W	NUT1		0.81859	0.003	0.81106	0.009	0.00637	0.003	0
tRNA-Pro(G3:U70)	YLL050C	COF1	cof1-5	1.12785	0.056	1.11438	0.028	0.00655	0.056	3e-05
tRNA-Pro(G3:U70)	YNL041C	COG6		0.9678	0.016	0.95706	0.041	0.00659	0.016	0
tRNA-Pro(G3:U70)	YHR166C	CDC23	cdc23-1	1.07529	0.056	1.07136	0.118	0.00667	0.056	4e-05
tRNA-Pro(G3:U70)	YJR065C	ARP3	arp3-31	0.18335	0.091	0.17462	0.144	0.00683	0.091	0.07379	status=JK
tRNA-Pro(G3:U70)	YDR044W	HEM13	hem13-ph	0.93797	0.025	0.93165	0.013	0.00698	0.024	0
tRNA-Pro(G3:U70)	YJR112W	NNF1	nnf1-17	1.11737	0.017	1.1195	0.035	0.00714	0.017	0
tRNA-Pro(G3:U70)	YMR271C	URA10		1.02055	0.087	1.0209	0.08	0.0072	0.087	0	status=JK
tRNA-Pro(G3:U70)	YLR005W	SSL1	ssl1-t242i	0.56068	0.079	0.56688	0.121	0.00734	0.079	0.00076
tRNA-Pro(G3:U70)	YJL046W	AIM22		1.1111	0.031	1.10856	0.046	0.00761	0.031	1e-05
tRNA-Pro(G3:U70)	YIL143C	SSL2	ssl2-ts	0.92008	0.191	0.94702	0.13	0.00764	0.191	0.00237
tRNA-Pro(G3:U70)	YDR310C	SUM1		1.18323	0.042	1.1698	0.056	0.00777	0.042	1e-05
tRNA-Pro(G3:U70)	YJR073C	OPI3		0.92322	0.015	0.91749	0.01	0.00794	0.015	0
tRNA-Pro(G3:U70)	YML125C	PGA3	pga3-ph	1.17672	0.059	1.15976	0.038	0.00799	0.059	3e-05
tRNA-Pro(G3:U70)	YER083C	GET2		1.12615	0.008	1.11686	0.003	0.0082	0.008	0
tRNA-Pro(G3:U70)	YDR189W	SLY1	sly1-ts	1.09224	0.038	1.08844	0.056	0.00823	0.038	1e-05
tRNA-Pro(G3:U70)	YNL158W	PGA1	pga1-ph	1.16006	0.082	1.13106	0.059	0.00839	0.082	0.0001
tRNA-Pro(G3:U70)	YGL113W	SLD3	sld3-ph	1.04193	0.02	1.03208	0.002	0.00844	0.02	0
tRNA-Pro(G3:U70)	YPR161C	SGV1	sgv1-23	0.00856	0.015	0.008	0.014	0.00855	0.014	0.41447	status=JK
tRNA-Pro(G3:U70)	YHR170W	NMD3	nmd3-4	1.02062	0.014	1.01352	0.003	0.00873	0.014	7e-05	status=JK
tRNA-Pro(G3:U70)	YOR046C	DBP5	dbp5-2	0.08476	0.013	0.10854	0.057	0.00875	0.013	0.00092
tRNA-Pro(G3:U70)	YPR103W	PRE2	pre2-127	1.04357	0.036	1.03978	0.028	0.00881	0.036	1e-05
tRNA-Pro(G3:U70)	YOR361C	PRT1	prt1-1	1.06484	0.015	1.06216	0.043	0.00887	0.015	7e-05	status=JK
tRNA-Pro(G3:U70)	YCL059C	KRR1	krr1-18	0.87856	0.032	0.86384	0.026	0.00891	0.032	1e-05
tRNA-Pro(G3:U70)	YKL021C	MAK11	mak11-ph	1.03048	0.042	1.01796	0.023	0.00894	0.042	2e-05
tRNA-Pro(G3:U70)	YGR075C	PRP38	prp38-1	1.18142	0.089	1.17769	0.041	0.00894	0.089	0.00012
tRNA-Pro(G3:U70)	YLR115W	CFT2	cft2-1	0.78067	0.169	0.79235	0.077	0.00898	0.169	0.0027
tRNA-Pro(G3:U70)	YKL018W	SWD2	swd2-1	1.05463	0.103	1.05213	0.025	0.00906	0.103	0.00026
tRNA-Pro(G3:U70)	YCL004W	PGS1	ycl004w-ph	1.17498	0.064	1.14888	0.067	0.00915	0.063	4e-05
tRNA-Pro(G3:U70)	YDR141C	DOP1	dop1-1	1.14525	0.037	1.1353	0.025	0.0092	0.037	1e-05
tRNA-Pro(G3:U70)	YAL034W-A	MTW1	mtw1-ts	1.12745	0.095	1.11217	0.103	0.00933	0.095	0.00017
tRNA-Pro(G3:U70)	YLR032W	RAD5		1.00565	0.027	0.9998	0.022	0.00978	0.027	1e-05
tRNA-Pro(G3:U70)	YGR048W	UFD1	ufd1-2	0.01012	0.018	0	0	0.01011	0.018	0.42265	status=JK
tRNA-Pro(G3:U70)	YDR170C	SEC7	sec7-1	1.08978	0.045	1.08276	0.058	0.01025	0.045	2e-05
tRNA-Pro(G3:U70)	YDL105W	NSE4	nse4-ts2	0.90872	0.012	0.89408	0.034	0.01026	0.012	0
tRNA-Pro(G3:U70)	YMR028W	TAP42	tap42-11	1.14646	0.002	1.13223	0.045	0.01035	0.002	0	status=JK
tRNA-Pro(G3:U70)	YLR319C	BUD6		1.1587	0.023	1.14772	0.025	0.01042	0.023	0
tRNA-Pro(G3:U70)	YGL130W	CEG1	ceg1-c354	0.05927	0.038	0.03945	0.026	0.01052	0.038	0.11455	status=JK
tRNA-Pro(G3:U70)	YKR092C	SRP40		1.05895	0.023	1.04644	0.045	0.01073	0.023	0
tRNA-Pro(G3:U70)	YMR100W	MUB1		1.13906	0.011	1.13353	0.02	0.01087	0.011	3e-05	status=JK
tRNA-Pro(G3:U70)	YKL004W	AUR1	ykl004w-ph	1.2506	0.014	1.23941	0.046	0.01089	0.014	4e-05	status=JK
tRNA-Pro(G3:U70)	YBR060C	ORC2	orc2-1	1.12177	0.031	1.10855	0.01	0.01113	0.031	1e-05
tRNA-Pro(G3:U70)	YAL011W	SWC3		1.14378	0.057	1.12639	0.028	0.01137	0.057	3e-05
tRNA-Pro(G3:U70)	YML023C	NSE5	nse5-ts4	0.9506	0.051	0.94069	0.043	0.0114	0.051	4e-05
tRNA-Pro(G3:U70)	YKL088W	CAB3	cab3-ph	1.16418	0.018	1.15308	0.039	0.01154	0.018	8e-05	status=JK
tRNA-Pro(G3:U70)	YML041C	VPS71		0.94302	0.078	0.93442	0.046	0.01162	0.078	0.00016
tRNA-Pro(G3:U70)	YKL112W	ABF1	abf1-102	1.03157	0.003	1.01848	0.014	0.0117	0.003	0	status=JK
tRNA-Pro(G3:U70)	YBL023C	MCM2	mcm2-1	1.22651	0.085	1.21976	0.037	0.0118	0.085	9e-05
tRNA-Pro(G3:U70)	YPL228W	CET1	cet1-2	1.04533	0.033	1.03111	0.018	0.01185	0.033	1e-05
tRNA-Pro(G3:U70)	YDL105W	NSE4	nse4-ts1	0.90837	0.054	0.89349	0.006	0.01192	0.054	6e-05
tRNA-Pro(G3:U70)	YDR228C	PCF11	pcf11-ts2	0.98959	0.061	0.98525	0.035	0.01201	0.06	6e-05
tRNA-Pro(G3:U70)	YDR060W	MAK21	mak21-1	1.03496	0.025	1.01911	0.009	0.01202	0.025	0
tRNA-Pro(G3:U70)	YPR033C	HTS1	hts1-1	0.467	0.544	0.45727	0.528	0.01204	0.544	0.18477
tRNA-Pro(G3:U70)	YOR370C	MRS6	mrs6-2	1.16065	0.003	1.15925	0.059	0.01209	0.003	0	status=JK
tRNA-Pro(G3:U70)	YBR026C	ETR1		1.07435	0.05	1.06839	0.043	0.01242	0.05	3e-05
tRNA-Pro(G3:U70)	YOR168W	GLN4	gln4-ph	1.09541	0.077	1.08415	0.019	0.0126	0.077	9e-05
tRNA-Pro(G3:U70)	YIL118W	RHO3	rho3-ser228	0.98167	0.024	0.96487	0.03	0.01263	0.024	0
tRNA-Pro(G3:U70)	YNR026C	SEC12	sec12-4	1.14008	0.036	1.13118	0.018	0.01263	0.036	1e-05
tRNA-Pro(G3:U70)	YKL032C	IXR1		0.89457	0.036	0.87786	0.021	0.01268	0.036	2e-05
tRNA-Pro(G3:U70)	YGL130W	CEG1	ceg1-34	0.99274	0.007	0.97914	0.023	0.01269	0.007	2e-05	status=JK
tRNA-Pro(G3:U70)	YDR362C	TFC6	tfc6-m1	1.24286	0.031	1.2323	0.006	0.01272	0.031	0
tRNA-Pro(G3:U70)	YKL042W	SPC42	spc42-10	1.03489	0.027	1.01755	0.039	0.01293	0.027	0
tRNA-Pro(G3:U70)	YHR166C	CDC23	cdc23-4	1.07645	0.016	1.06613	0.025	0.01317	0.016	8e-05	status=JK
tRNA-Pro(G3:U70)	YGL213C	SKI8		1.25198	0.205	1.25512	0.073	0.0132	0.205	0.00119
tRNA-Pro(G3:U70)	YDR228C	PCF11	pcf11-ts10	1.07433	0.027	1.05746	0.027	0.01324	0.027	0
tRNA-Pro(G3:U70)	YDL014W	NOP1	nop1-3	1.29291	0.03	1.2682	0.034	0.01339	0.03	0
tRNA-Pro(G3:U70)	YML077W	BET5	bet5-ph	1.06205	0.054	1.04643	0.013	0.01367	0.054	4e-05
tRNA-Pro(G3:U70)	YDL087C	LUC7	luc7-1	1.19353	0.084	1.17501	0.013	0.01369	0.084	9e-05
tRNA-Pro(G3:U70)	YHR129C	ARP1		1.14075	0.049	1.12775	0.032	0.01385	0.049	2e-05
tRNA-Pro(G3:U70)	YNL126W	SPC98	spc98-ph	1.17784	0.046	1.144	0.064	0.01391	0.046	2e-05
tRNA-Pro(G3:U70)	YJR093C	FIP1	fip1-ph	0.87064	0.018	0.86531	0.039	0.01403	0.018	0
tRNA-Pro(G3:U70)	YML126C	ERG13	erg13-ph	0.83324	0.035	0.81037	0.035	0.01417	0.035	2e-05
tRNA-Pro(G3:U70)	YPL174C	NIP100		1.00716	0.007	0.99477	0.006	0.0145	0.007	1e-05	status=JK
tRNA-Pro(G3:U70)	YOL021C	DIS3	dis3-1	1.1056	0.008	1.0824	0.035	0.01461	0.008	2e-05	status=JK
tRNA-Pro(G3:U70)	YOL135C	MED7	med7-163	1.00385	0.011	0.98637	0.021	0.01464	0.011	0
tRNA-Pro(G3:U70)	YNL102W	POL1	pol1-ts	1.03806	0.048	1.01985	0.027	0.0147	0.048	3e-05
tRNA-Pro(G3:U70)	YKL154W	SRP102	srp102-510	1.1058	0.024	1.0919	0.02	0.01477	0.024	0
tRNA-Pro(G3:U70)	YKL060C	FBA1	ykl060c-ph	0.96006	0.088	0.94561	0.058	0.01478	0.088	0.00021
tRNA-Pro(G3:U70)	YJR076C	CDC11	cdc11-1	1.24284	0.016	1.22705	0.036	0.01492	0.016	6e-05	status=JK
tRNA-Pro(G3:U70)	YGR094W	VAS1	ygr094w-ph	1.11449	0.049	1.10114	0.049	0.01506	0.049	2e-05
tRNA-Pro(G3:U70)	YGR034W	RPL26B		0.9922	0.06	0.97545	0.018	0.01528	0.059	6e-05
tRNA-Pro(G3:U70)	YDR052C	DBF4	dbf4-2	0.97201	0.062	0.94929	0.014	0.01529	0.062	7e-05
tRNA-Pro(G3:U70)	YOR089C	VPS21		1.06195	0.009	1.04438	0.008	0.01534	0.009	0
tRNA-Pro(G3:U70)	YLR440C	SEC39	sec39-ph	0.6836	0.047	0.6574	0.037	0.01544	0.047	9e-05
tRNA-Pro(G3:U70)	YDR050C	TPI1	tpi1-1670	1.24957	0.034	1.23217	0.022	0.01558	0.034	1e-05
tRNA-Pro(G3:U70)	YLR268W	SEC22	sec22-1	1.02077	0.027	0.9989	0.037	0.01604	0.027	1e-05
tRNA-Pro(G3:U70)	YOL135C	MED7	med7-141	0.78606	0.036	0.76012	0.039	0.01608	0.036	3e-05
tRNA-Pro(G3:U70)	YPL160W	CDC60	cdc60-ts	1.11266	0.01	1.09302	0.02	0.01612	0.01	0
tRNA-Pro(G3:U70)	YML103C	NUP188		0.99412	0.067	0.97587	0.016	0.01627	0.067	8e-05
tRNA-Pro(G3:U70)	YER093C	TSC11	tsc11-7	0.98765	0.138	0.97797	0.104	0.01638	0.138	0.00074
tRNA-Pro(G3:U70)	YDR123C	INO2		0.1312	0.005	0.11799	0.006	0.01644	0.005	0.00042	status=JK
tRNA-Pro(G3:U70)	YLR089C	ALT1		0.94982	0.048	0.94346	0.049	0.01648	0.048	3e-05
tRNA-Pro(G3:U70)	YJR076C	CDC11	cdc11-3	1.29439	0.102	1.27131	0.095	0.01667	0.102	0.00013
tRNA-Pro(G3:U70)	YFL017C	GNA1	yfl017c-ph	0.9292	0.05	0.90851	0.017	0.01668	0.05	4e-05
tRNA-Pro(G3:U70)	YIL115C	NUP159	nup159-1	0.92004	0.014	0.9127	0.048	0.01674	0.014	8e-05	status=JK
tRNA-Pro(G3:U70)	YKL144C	RPC25	rpc25-ph	0.98782	0.006	0.96975	0.015	0.01682	0.006	1e-05	status=JK
tRNA-Pro(G3:U70)	YLR163C	MAS1	mas1-1	1.13301	0.05	1.11186	0.029	0.01682	0.05	2e-05
tRNA-Pro(G3:U70)	YPL252C	YAH1	yah1-ts	0.0646	0.064	0.06523	0.081	0.01703	0.063	0.13475
tRNA-Pro(G3:U70)	YDR013W	PSF1	psf1-1	1.13985	0.041	1.12557	0.014	0.01724	0.041	1e-05
tRNA-Pro(G3:U70)	YLR186W	EMG1	emg1-1	0.99953	0.076	1.00085	0.08	0.01729	0.076	0.00012
tRNA-Pro(G3:U70)	YLR378C	SEC61	sec61-2	1.05318	0.057	1.04695	0.031	0.01729	0.057	0.00098	status=JK
tRNA-Pro(G3:U70)	YPR103W	PRE2	pre2-1	1.00444	0.01	0.99367	0.063	0.01743	0.01	3e-05	status=JK
tRNA-Pro(G3:U70)	YNL102W	POL1	pol1-1	1.06715	0.012	1.0589	0.037	0.01744	0.012	0
tRNA-Pro(G3:U70)	YGL093W	SPC105	spc105-15	1.1478	0.042	1.13153	0.036	0.0176	0.041	1e-05
tRNA-Pro(G3:U70)	YCR002C	CDC10	cdc10-2	1.13774	0.022	1.11256	0.026	0.0178	0.022	0
tRNA-Pro(G3:U70)	YER093C	TSC11	tsc11-1	0.7996	0.044	0.77081	0.054	0.01781	0.044	5e-05
tRNA-Pro(G3:U70)	YPR162C	ORC4	ypr162c-ph	0.81321	0.066	0.8069	0.066	0.01842	0.065	0.00014
tRNA-Pro(G3:U70)	YML098W	TAF13	taf13-1	1.01977	0.02	1.00324	0.033	0.0185	0.02	0
tRNA-Pro(G3:U70)	YML065W	ORC1	orc1-ph	0.88114	0.046	0.85809	0.01	0.0187	0.046	4e-05
tRNA-Pro(G3:U70)	YDR127W	ARO1		0.973	0.013	0.96027	0.026	0.01914	0.013	6e-05	status=JK
tRNA-Pro(G3:U70)	YBR193C	MED8	med8-39	1.02197	0.016	1.00187	0.002	0.01924	0.016	0
tRNA-Pro(G3:U70)	YJR112W	NNF1	nnf1-48	1.27321	0.049	1.26214	0.034	0.01928	0.049	2e-05
tRNA-Pro(G3:U70)	YHR005C	GPA1	gpa1-ts	1.14089	0.016	1.10785	0.05	0.01996	0.016	7e-05	status=JK
tRNA-Pro(G3:U70)	YLR298C	YHC1	yhc1-6	0.48633	0.105	0.46073	0.042	0.02029	0.105	0.00266
tRNA-Pro(G3:U70)	YFR028C	CDC14	cdc14-1	1.04276	0.02	1.02092	0.022	0.02056	0.02	0
tRNA-Pro(G3:U70)	YDR087C	RRP1	rrp1-1	0.70454	0.048	0.67621	0.043	0.02056	0.048	9e-05
tRNA-Pro(G3:U70)	YIR012W	SQT1	sqt1-201	1.04167	0.015	0.99858	0.076	0.02085	0.015	7e-05	status=JK
tRNA-Pro(G3:U70)	YDL028C	MPS1	mps1-3796	1.05663	0.043	1.03711	0.026	0.02094	0.043	2e-05
tRNA-Pro(G3:U70)	YPL266W	DIM1	dim1-2	0.93387	0.006	0.91514	0.032	0.02107	0.006	0
tRNA-Pro(G3:U70)	YML028W	TSA1		1.2505	0.016	1.22809	0.001	0.02117	0.016	5e-05	status=JK
tRNA-Pro(G3:U70)	YDR062W	LCB2	lcb2-1	0.37828	0.029	0.35531	0.003	0.02133	0.029	0.00013
tRNA-Pro(G3:U70)	YHR040W	BCD1	bcd1-ph	1.0388	0.042	1.00921	0.016	0.02143	0.042	2e-05
tRNA-Pro(G3:U70)	YML098W	TAF13	taf13-2	0.89899	0.021	0.87878	0.003	0.02148	0.021	0
tRNA-Pro(G3:U70)	YCR002C	CDC10	cdc10-1	1.27811	0.053	1.25327	0.013	0.02161	0.053	2e-05
tRNA-Pro(G3:U70)	YDR373W	FRQ1	frq1-1	1.12191	0.033	1.10244	0.009	0.02162	0.033	1e-05
tRNA-Pro(G3:U70)	YNL147W	LSM7		1.29136	0.039	1.2787	0.052	0.02168	0.039	1e-05
tRNA-Pro(G3:U70)	YJR139C	HOM6		0.98446	0.033	0.96051	0.005	0.02173	0.033	1e-05
tRNA-Pro(G3:U70)	YNL079C	TPM1		0.94244	0.008	0.92454	0.01	0.02206	0.008	3e-05	status=JK
tRNA-Pro(G3:U70)	YPL190C	NAB3	nab3-11	0.12914	0.015	0.10813	0.02	0.02215	0.015	0.00045
tRNA-Pro(G3:U70)	YPL169C	MEX67	mex67-ts5	0.99414	0.02	0.97112	0.003	0.0224	0.02	0
tRNA-Pro(G3:U70)	YFL008W	SMC1	smc1-259	1.09352	0.052	1.07895	0.066	0.02249	0.052	3e-05
tRNA-Pro(G3:U70)	YOR294W	RRS1	rrs1-84	1.09098	0.062	1.06916	0.005	0.02256	0.062	5e-05
tRNA-Pro(G3:U70)	YMR190C	SGS1		1.11498	0.075	1.09767	0.021	0.02296	0.075	8e-05
tRNA-Pro(G3:U70)	YJL104W	PAM16	pam16-3	0.90483	0.008	0.88844	0.058	0.02301	0.008	0
tRNA-Pro(G3:U70)	YNL075W	IMP4	imp4-2	0.79346	0.014	0.77072	0.009	0.02305	0.014	0
tRNA-Pro(G3:U70)	YCR042C	TAF2	taf2-1	1.06574	0.04	1.04212	0.035	0.02337	0.04	1e-05
tRNA-Pro(G3:U70)	YHR178W	STB5		0.91695	0.01	0.88623	0.03	0.02352	0.01	0
tRNA-Pro(G3:U70)	YAL041W	CDC24	cdc24-1	1.05602	0.046	1.03093	0.041	0.02357	0.046	2e-05
tRNA-Pro(G3:U70)	YOR149C	SMP3	smp3-2	1.09907	0.021	1.0746	0.031	0.02378	0.021	0
tRNA-Pro(G3:U70)	YDL111C	RRP42	rrp42-ph	0.98186	0.029	0.95433	0.019	0.02384	0.029	1e-05
tRNA-Pro(G3:U70)	YER092W	IES5		0.91323	0.005	0.88777	0.005	0.02405	0.005	0
tRNA-Pro(G3:U70)	YDR243C	PRP28	prp28-101	1.19937	0.041	1.17954	0.015	0.02427	0.041	1e-05
tRNA-Pro(G3:U70)	YGR092W	DBF2		0.83902	0.094	0.82295	0.163	0.02451	0.094	0.00038
tRNA-Pro(G3:U70)	YBR156C	SLI15	sli15-3	1.0207	0.019	1.00298	0.043	0.02452	0.019	0
tRNA-Pro(G3:U70)	YGL061C	DUO1	duo1-2	1.21118	0.056	1.18682	0.038	0.0248	0.055	3e-05
tRNA-Pro(G3:U70)	YDR240C	SNU56	ydr240c-ph	1.12989	0.016	1.10329	0.038	0.02484	0.016	0
tRNA-Pro(G3:U70)	YIL046W	MET30	met30-6	0.90969	0.092	0.87433	0.059	0.02495	0.092	0.00028
tRNA-Pro(G3:U70)	YOR254C	SEC63	sec63-1	0.86397	0.031	0.83577	0.02	0.02501	0.031	1e-05
tRNA-Pro(G3:U70)	YNL038W	GPI15	gpi15-ph	1.053	0.046	1.03557	0.038	0.02544	0.046	2e-05
tRNA-Pro(G3:U70)	YDR062W	LCB2	lcb2-16	0.57362	0.026	0.55318	0.042	0.02544	0.026	3e-05
tRNA-Pro(G3:U70)	YIL004C	BET1	bet1-1	1.06231	0.061	1.02594	0.043	0.02555	0.061	5e-05
tRNA-Pro(G3:U70)	YBR102C	EXO84	exo84-102	0.95948	0.042	0.92786	0.045	0.02562	0.042	2e-05
tRNA-Pro(G3:U70)	YCR052W	RSC6	rsc6-ph	1.14889	0.032	1.13549	0.055	0.02565	0.032	1e-05
tRNA-Pro(G3:U70)	YLR008C	PAM18	pam18-1	0.90314	0.009	0.86878	0.016	0.02578	0.009	3e-05	status=JK
tRNA-Pro(G3:U70)	YGR005C	TFG2	tfg2-ph	1.03801	0.01	1.03155	0.043	0.02581	0.01	3e-05	status=JK
tRNA-Pro(G3:U70)	YDR228C	PCF11	pcf11-2	1.01471	0.051	0.99111	0.044	0.0259	0.051	3e-05
tRNA-Pro(G3:U70)	YOR272W	YTM1	ytm1-1	1.08684	0.035	1.0617	0.027	0.02596	0.035	1e-05
tRNA-Pro(G3:U70)	YMR168C	CEP3	cep3-1	1.23846	0.053	1.19831	0.131	0.02611	0.053	2e-05
tRNA-Pro(G3:U70)	YKL019W	RAM2	ykl019w-ph	1.00256	0.084	0.96601	0.051	0.02623	0.084	0.00016
tRNA-Pro(G3:U70)	YOR122C	PFY1	pfy1-14	1.12278	0.069	1.10323	0.023	0.02665	0.069	6e-05
tRNA-Pro(G3:U70)	YGL065C	ALG2	alg2-1	1.17377	0.021	1.14989	0.059	0.02668	0.021	0.00011	status=JK
tRNA-Pro(G3:U70)	YKL203C	TOR2	tor2-21	0.80633	0.014	0.77372	0.023	0.02671	0.014	0
tRNA-Pro(G3:U70)	YDR004W	RAD57		0.86822	0.009	0.84058	0.06	0.02688	0.009	4e-05	status=JK
tRNA-Pro(G3:U70)	YBR135W	CKS1	cks1-35	0.98161	0.033	0.95543	0.022	0.02694	0.033	1e-05
tRNA-Pro(G3:U70)	YDL033C	SLM3		1.1159	0.04	1.09775	0.048	0.02696	0.04	1e-05
tRNA-Pro(G3:U70)	YFL034C-B	MOB2	mob2-8	1.19846	0.111	1.15992	0.02	0.02711	0.111	0.00022
tRNA-Pro(G3:U70)	YLR166C	SEC10	sec10-2	1.08148	0.006	1.05084	0.02	0.02729	0.006	1e-05	status=JK
tRNA-Pro(G3:U70)	YIL109C	SEC24	sec24-2	1.13178	0.028	1.10159	0.021	0.02756	0.028	0
tRNA-Pro(G3:U70)	YBL076C	ILS1	ils1-1	0.94608	0.027	0.91899	0.042	0.02795	0.027	1e-05
tRNA-Pro(G3:U70)	YIR010W	DSN1	dsn1-8	1.07367	0.009	1.04498	0.018	0.02796	0.009	2e-05	status=JK
tRNA-Pro(G3:U70)	YPL120W	VPS30		1.21877	0.016	1.18278	0.034	0.02815	0.016	6e-05	status=JK
tRNA-Pro(G3:U70)	YMR224C	MRE11		0.86743	0.009	0.84057	0.032	0.02821	0.009	4e-05	status=JK
tRNA-Pro(G3:U70)	YHR034C	PIH1		1.12711	0.039	1.0939	0.032	0.02838	0.039	1e-05
tRNA-Pro(G3:U70)	YNL138W	SRV2	srv2-ts	1.04049	0.05	1.01453	0.039	0.0284	0.05	3e-05
tRNA-Pro(G3:U70)	YNR053C	NOG2	nog2-1	0.67319	0.024	0.64768	0.016	0.02843	0.024	1e-05
tRNA-Pro(G3:U70)	YMR075W	RCO1		1.05604	0.014	1.02405	0.032	0.02845	0.014	6e-05	status=JK
tRNA-Pro(G3:U70)	YBR060C	ORC2	orc2-3	1.14441	0.032	1.12324	0.065	0.02885	0.032	1e-05
tRNA-Pro(G3:U70)	YBR058C-A	TSC3	tsc3-2	0.42432	0.108	0.39553	0.068	0.02904	0.108	0.00425
tRNA-Pro(G3:U70)	YIR010W	DSN1	dsn1-7	1.16866	0.027	1.12873	0.044	0.02909	0.027	0
tRNA-Pro(G3:U70)	YDR082W	STN1	stn1-13	1.11501	0.079	1.09164	0.047	0.02911	0.079	0.0001
tRNA-Pro(G3:U70)	YLR276C	DBP9	dbp9-ph	1.11118	0.045	1.08036	0.01	0.02918	0.045	2e-05
tRNA-Pro(G3:U70)	YMR227C	TAF7	taf7-ts1	0.93649	0.008	0.895	0.156	0.02924	0.008	2e-05	status=JK
tRNA-Pro(G3:U70)	YPR055W	SEC8	sec8-9	1.20793	0.01	1.17366	0.014	0.02954	0.01	0
tRNA-Pro(G3:U70)	YKL189W	HYM1	hym1-15	1.2864	0.039	1.26009	0.013	0.02965	0.039	1e-05
tRNA-Pro(G3:U70)	YDL058W	USO1	uso1-1	1.0801	0.044	1.04677	0.041	0.02971	0.044	2e-05
tRNA-Pro(G3:U70)	YKR084C	HBS1		1.18444	0.057	1.15395	0.041	0.0298	0.057	3e-05
tRNA-Pro(G3:U70)	YNL062C	GCD10	gcd10-506	1.2031	0.018	1.17155	0.02	0.02991	0.018	7e-05	status=JK
tRNA-Pro(G3:U70)	YGL155W	CDC43	cdc43-2	0.86535	0.052	0.83281	0.012	0.03007	0.052	6e-05
tRNA-Pro(G3:U70)	YLR298C	YHC1	yhc1-7	0.21645	0.176	0.17256	0.081	0.0303	0.176	0.09057
tRNA-Pro(G3:U70)	YDR331W	GPI8	ydr331w-ph	1.1994	0.071	1.15368	0.036	0.03049	0.071	6e-05
tRNA-Pro(G3:U70)	YIL104C	SHQ1	shq1-ph	1.01031	0.017	0.97759	0.028	0.03056	0.017	0
tRNA-Pro(G3:U70)	YHR083W	SAM35	sam35-2	1.10975	0.099	1.03605	0.213	0.03079	0.098	0.00019
tRNA-Pro(G3:U70)	YFL034C-B	MOB2	mob2-36	0.96753	0.011	0.93364	0.014	0.03091	0.011	0
tRNA-Pro(G3:U70)	YDL008W	APC11	apc11-13	0.64504	0.038	0.61029	0.019	0.03101	0.038	6e-05
tRNA-Pro(G3:U70)	YOL069W	NUF2	nuf2-61	1.14482	0.029	1.12045	0.013	0.03123	0.029	0
tRNA-Pro(G3:U70)	YKL113C	RAD27		0.99745	0.004	0.96137	0.035	0.03125	0.004	0	status=JK
tRNA-Pro(G3:U70)	YBL105C	PKC1	pkc1-ts	1.17918	0.016	1.15018	0.016	0.03128	0.016	0
tRNA-Pro(G3:U70)	YJL148W	RPA34		1.06389	0.022	1.04529	0.063	0.03152	0.022	0
tRNA-Pro(G3:U70)	YHR088W	RPF1	rpf1-1	1.04159	0.023	0.99525	0.054	0.03155	0.023	0
tRNA-Pro(G3:U70)	YGR211W	ZPR1	zpr1-1	0.7324	0.059	0.70959	0.037	0.03159	0.059	0.00014
tRNA-Pro(G3:U70)	YJL090C	DPB11	dpb11-1	1.18025	0.035	1.14351	0.037	0.03164	0.035	1e-05
tRNA-Pro(G3:U70)	YER125W	RSP5	rsp5-sm1	0.68781	0.005	0.65946	0.064	0.03169	0.005	2e-05	status=JK
tRNA-Pro(G3:U70)	YHR107C	CDC12	cdc12-td	1.16377	0.023	1.13059	0.025	0.03175	0.023	0
tRNA-Pro(G3:U70)	YBL041W	PRE7	pre7-ph	1.02424	0.043	0.99438	0.004	0.03181	0.043	2e-05
tRNA-Pro(G3:U70)	YLR310C	CDC25	cdc25-2	1.10735	0.052	1.07162	0.014	0.0319	0.052	3e-05
tRNA-Pro(G3:U70)	YBL084C	CDC27	cdc27-2	0.96634	0.031	0.94012	0.035	0.03191	0.031	1e-05
tRNA-Pro(G3:U70)	YDR315C	IPK1		1.13709	0.021	1.10782	0.017	0.03206	0.021	0
tRNA-Pro(G3:U70)	YDR512C	EMI1		1.06501	0.043	1.04105	0.034	0.03223	0.043	2e-05
tRNA-Pro(G3:U70)	YML001W	YPT7		1.05964	0.045	1.0246	0.021	0.03247	0.045	2e-05
tRNA-Pro(G3:U70)	YOR194C	TOA1	toa1-ph	0.76547	0.106	0.73147	0.08	0.0333	0.106	0.00073
tRNA-Pro(G3:U70)	YDR212W	TCP1	tcp1-1	1.10257	0.051	1.06898	0.002	0.03338	0.051	3e-05
tRNA-Pro(G3:U70)	YDR208W	MSS4	mss4-102	0.59219	0.048	0.56189	0.104	0.03358	0.048	0.00015
tRNA-Pro(G3:U70)	YPL082C	MOT1	mot1-1033	0.15033	0.01	0.11563	0.092	0.03362	0.01	0.00152	status=JK
tRNA-Pro(G3:U70)	YLR115W	CFT2	cft2-ph	0.79311	0.15	0.74465	0.203	0.03375	0.15	0.0018
tRNA-Pro(G3:U70)	YGL233W	SEC15	sec15-1	1.10696	0.02	1.07635	0.015	0.03404	0.02	0
tRNA-Pro(G3:U70)	YPL228W	CET1	cet1-15	1.04763	0.011	1.01107	0.009	0.03431	0.011	0
tRNA-Pro(G3:U70)	YDL014W	NOP1	nop1-2	0.32473	0.092	0.31948	0.114	0.03458	0.092	0.02561	status=JK
tRNA-Pro(G3:U70)	YLR045C	STU2	stu2-13	1.19747	0.07	1.15119	0.094	0.0346	0.07	6e-05
tRNA-Pro(G3:U70)	YDR437W	GPI19	gpi19-2xh	1.03773	0.036	0.9974	0.018	0.03466	0.036	1e-05
tRNA-Pro(G3:U70)	YLR116W	MSL5	msl5-ph	1.17846	0.037	1.14752	0.008	0.03499	0.037	1e-05
tRNA-Pro(G3:U70)	YIL021W	RPB3	rpb3-2	1.018	0.041	0.98497	0.041	0.03524	0.041	2e-05
tRNA-Pro(G3:U70)	YCL032W	STE50		1.07	0.036	1.03491	0.037	0.03532	0.036	1e-05
tRNA-Pro(G3:U70)	YOR020C	HSP10	hsp10-ts	0.78115	0.017	0.74716	0.01	0.03542	0.017	0.00016	status=JK
tRNA-Pro(G3:U70)	YLR249W	YEF3	yef3-f650s	0.25925	0.043	0.23536	0.092	0.03547	0.043	0.00909	status=JK
tRNA-Pro(G3:U70)	YBL026W	LSM2	lsm2-ph	1.22498	0.024	1.18846	0.017	0.0355	0.024	0
tRNA-Pro(G3:U70)	YLR410W	VIP1		1.09646	0.025	1.06148	0.011	0.03577	0.025	0
tRNA-Pro(G3:U70)	YDL045C	FAD1	fad1-ph	1.08869	0.022	1.04417	0.049	0.03584	0.022	0
tRNA-Pro(G3:U70)	YPR018W	RLF2		1.16999	0.046	1.1268	0.017	0.03586	0.046	2e-05
tRNA-Pro(G3:U70)	YFL038C	YPT1	ypt1-3	1.07327	0.067	1.0353	0.014	0.03592	0.067	7e-05
tRNA-Pro(G3:U70)	YBR152W	SPP381	spp381-ph	1.07865	0.039	1.04323	0.017	0.03619	0.039	1e-05
tRNA-Pro(G3:U70)	YER161C	SPT2		1.01706	0	0.97935	0.046	0.03631	0	0	status=JK
tRNA-Pro(G3:U70)	YNR051C	BRE5		0.98761	0.003	0.94889	0.024	0.03637	0.003	0	status=JK
tRNA-Pro(G3:U70)	YML010W	SPT5	spt5-194	0.03649	0.049	0.01417	0.025	0.03646	0.049	0.23541
tRNA-Pro(G3:U70)	YJL085W	EXO70	exo70-29/37	0.81376	0.133	0.79381	0.034	0.03653	0.133	0.00117
tRNA-Pro(G3:U70)	YPR183W	DPM1	dpm1-6	0.97731	0.003	0.94133	0.006	0.03665	0.003	0	status=JK
tRNA-Pro(G3:U70)	YKL035W	UGP1	ugp1-ph	1.08079	0.075	1.02406	0.083	0.03684	0.075	9e-05
tRNA-Pro(G3:U70)	YDR303C	RSC3	rsc3-1	1.18495	0.065	1.14226	0.041	0.03693	0.065	5e-05
tRNA-Pro(G3:U70)	YIL126W	STH1	sth1-3	0.81581	0.423	0.78676	0.186	0.03724	0.423	0.03083
tRNA-Pro(G3:U70)	YIL068C	SEC6	sec6-4	1.22374	0.036	1.1863	0.017	0.03727	0.036	1e-05
tRNA-Pro(G3:U70)	YBR087W	RFC5	rfc5-1	1.08953	0.088	1.059	0.068	0.03734	0.088	0.00015
tRNA-Pro(G3:U70)	YOR257W	CDC31	cdc31-5	0.0753	0.013	0.05213	0.055	0.03755	0.013	0.00957	status=JK
tRNA-Pro(G3:U70)	YNL102W	POL1	pol1-17	0.46403	0.159	0.43455	0.209	0.03765	0.158	0.00994
tRNA-Pro(G3:U70)	YLR208W	SEC13	sec13-1	0.95729	0.046	0.91226	0.04	0.03783	0.046	3e-05
tRNA-Pro(G3:U70)	YDR496C	PUF6		0.96005	0.049	0.92369	0.042	0.03795	0.049	4e-05
tRNA-Pro(G3:U70)	YHR085W	IPI1	ipi1-ph	0.88647	0.035	0.84922	0.006	0.03807	0.035	2e-05
tRNA-Pro(G3:U70)	YMR076C	PDS5	pds5-1	0.9962	0.111	0.95724	0.001	0.0381	0.111	0.00038
tRNA-Pro(G3:U70)	YMR117C	SPC24	spc24-10	1.2188	0.035	1.18497	0.023	0.03819	0.034	1e-05
tRNA-Pro(G3:U70)	YIL026C	IRR1	irr1-1	1.27207	0.098	1.28954	0.102	0.03821	0.098	0.00013
tRNA-Pro(G3:U70)	YMR263W	SAP30		1.17357	0.021	1.12162	0.055	0.03826	0.021	0
tRNA-Pro(G3:U70)	YNL064C	YDJ1		1.13878	0.079	1.09589	0.09	0.0383	0.079	9e-05
tRNA-Pro(G3:U70)	YLR110C	CCW12		1.15402	0.096	1.09994	0.062	0.03848	0.096	0.00016
tRNA-Pro(G3:U70)	YNL067W	RPL9B		1.06048	0.023	1.02383	0.026	0.03852	0.023	0
tRNA-Pro(G3:U70)	YDR437W	GPI19	gpi19-ph	0.81485	0.065	0.77532	0.025	0.03868	0.065	0.00014
tRNA-Pro(G3:U70)	YJR093C	FIP1	fip1-433	1.05022	0.06	0.93536	0.238	0.03883	0.06	0.00108	status=JK
tRNA-Pro(G3:U70)	YDL017W	CDC7	cdc7-4	1.26441	0.065	1.22452	0.003	0.03914	0.065	4e-05
tRNA-Pro(G3:U70)	YKL006C-A	SFT1	sft1-15	1.03582	0.08	0.99531	0.058	0.03925	0.08	0.00013
tRNA-Pro(G3:U70)	YOR294W	RRS1	rrs1-124	1.11796	0.005	1.08105	0.01	0.03926	0.005	1e-05	status=JK
tRNA-Pro(G3:U70)	YLR191W	PEX13		1.23246	0.03	1.19184	0.05	0.0395	0.03	0
tRNA-Pro(G3:U70)	YHR088W	RPF1	rpf1-ph	0.99568	0.03	0.95279	0.035	0.03972	0.03	1e-05
tRNA-Pro(G3:U70)	YDL002C	NHP10		1.06248	0.076	1.02336	0.02	0.0404	0.075	0.0001
tRNA-Pro(G3:U70)	YGR245C	SDA1	sda1-2	0.86014	0.025	0.82117	0.014	0.04087	0.025	1e-05
tRNA-Pro(G3:U70)	YDR113C	PDS1	pds1-128	1.12608	0.047	1.09232	0.045	0.04087	0.047	2e-05
tRNA-Pro(G3:U70)	YPR086W	SUA7	ypr086w-ph	0.30673	0.089	0.24325	0.044	0.04129	0.088	0.00616
tRNA-Pro(G3:U70)	YKL052C	ASK1	ask1-2	1.19402	0.068	1.14705	0.013	0.04136	0.068	5e-05
tRNA-Pro(G3:U70)	YLR367W	RPS22B		1.21118	0.037	1.16499	0.017	0.04143	0.037	1e-05
tRNA-Pro(G3:U70)	YNR038W	DBP6	dbp6-ph	1.07481	0.028	1.03798	0.024	0.04195	0.028	0.00022	status=JK
tRNA-Pro(G3:U70)	YMR079W	SEC14	sec14-3	1.04357	0.009	0.99223	0.04	0.04202	0.009	3e-05	status=JK
tRNA-Pro(G3:U70)	YKL208W	CBT1		1.13647	0.06	1.09864	0.057	0.04207	0.06	4e-05
tRNA-Pro(G3:U70)	YKR068C	BET3	bet3-ph	0.21004	0.047	0.16822	0.113	0.04208	0.047	0.00298
tRNA-Pro(G3:U70)	YOR014W	RTS1		0.99116	0.025	0.95074	0.015	0.04244	0.025	0
tRNA-Pro(G3:U70)	YJL074C	SMC3	smc3-42	1.1602	0.024	1.10977	0.028	0.04249	0.024	0
tRNA-Pro(G3:U70)	YLR127C	APC2	apc2-8	1.16971	0.045	1.13672	0.045	0.04265	0.045	2e-05
tRNA-Pro(G3:U70)	YDR016C	DAD1	dad1-ph	1.01586	0.031	0.97506	0.02	0.04269	0.031	1e-05
tRNA-Pro(G3:U70)	YFL034C-B	MOB2	mob2-11	0.82514	0.033	0.79534	0.163	0.04318	0.033	0.00054	status=JK
tRNA-Pro(G3:U70)	YLR145W	RMP1	rmp1-ts	0.83065	0.022	0.79163	0.021	0.04323	0.022	1e-05
tRNA-Pro(G3:U70)	YAL041W	CDC24	cdc24-5	1.10959	0.045	1.05486	0.058	0.0433	0.045	2e-05
tRNA-Pro(G3:U70)	YNL006W	LST8	lst8-15	1.19209	0.075	1.13363	0.057	0.04332	0.075	7e-05
tRNA-Pro(G3:U70)	YDL102W	POL3	cdc2-2	1.06468	0.007	1.0201	0.004	0.04338	0.007	1e-05	status=JK
tRNA-Pro(G3:U70)	YDR166C	SEC5	sec5-24	1.17382	0.014	1.1262	0.029	0.04437	0.014	5e-05	status=JK
tRNA-Pro(G3:U70)	YLR078C	BOS1	bos1-1	0.88111	0.01	0.83691	0.034	0.0444	0.01	4e-05	status=JK
tRNA-Pro(G3:U70)	YDL105W	NSE4	nse4-ts3	0.92022	0.038	0.87311	0.018	0.04454	0.038	2e-05
tRNA-Pro(G3:U70)	YFL039C	ACT1	act1-105	0.98482	0.032	0.94282	0.029	0.04467	0.032	1e-05
tRNA-Pro(G3:U70)	YNL061W	NOP2	nop2-5	0.95919	0.055	0.90902	0.048	0.04468	0.055	5e-05
tRNA-Pro(G3:U70)	YPR103W	PRE2	pre2-v214a	1.04584	0.011	1.00541	0.059	0.04496	0.011	4e-05	status=JK
tRNA-Pro(G3:U70)	YDL103C	QRI1	qri1-ts6	1.1037	0.023	1.06418	0.03	0.04497	0.023	0
tRNA-Pro(G3:U70)	YIL084C	SDS3		1.10264	0.038	1.05119	0.038	0.04576	0.038	1e-05
tRNA-Pro(G3:U70)	YOL094C	RFC4	rfc4-20	1.01588	0.039	0.97322	0.057	0.04591	0.039	2e-05
tRNA-Pro(G3:U70)	YPR025C	CCL1	ccl1-ts4	1.1887	0.019	1.1403	0.005	0.04594	0.019	8e-05	status=JK
tRNA-Pro(G3:U70)	YPL047W	SGF11		1.09494	0.08	1.03811	0.042	0.04599	0.08	0.00011
tRNA-Pro(G3:U70)	YDR392W	SPT3		0.98351	0.015	0.93267	0.012	0.04609	0.015	7e-05	status=JK
tRNA-Pro(G3:U70)	YPL063W	TIM50	tim50-ph	1.10057	0.146	1.08299	0.088	0.04629	0.146	0.00063
tRNA-Pro(G3:U70)	YLL038C	ENT4		1.0693	0.011	1.02128	0.015	0.04633	0.011	3e-05	status=JK
tRNA-Pro(G3:U70)	YAL041W	CDC24	cdc24-h	1.18187	0.048	1.13156	0.035	0.04648	0.048	2e-05
tRNA-Pro(G3:U70)	YFL039C	ACT1	act1-2	0.51704	0.139	0.45329	0.112	0.04651	0.139	0.00503
tRNA-Pro(G3:U70)	YGL043W	DST1		1.17444	0.031	1.12306	0.037	0.04668	0.031	0
tRNA-Pro(G3:U70)	YIL048W	NEO1	neo1-2	1.18078	0.045	1.13342	0.001	0.04669	0.045	2e-05
tRNA-Pro(G3:U70)	YKR099W	BAS1		1.231	0.035	1.18392	0.022	0.04675	0.035	1e-05
tRNA-Pro(G3:U70)	YLR393W	ATP10		0.70906	0.182	0.64496	0.147	0.04679	0.182	0.00443
tRNA-Pro(G3:U70)	YER157W	COG3	cog3-1	0.59929	0.01	0.55775	0.047	0.04743	0.01	9e-05	status=JK
tRNA-Pro(G3:U70)	YDR156W	RPA14		1.09279	0.003	1.05489	0.07	0.04845	0.003	0	status=JK
tRNA-Pro(G3:U70)	YGR113W	DAM1	dam1-1	0.97363	0.133	0.9272	0.124	0.04871	0.133	0.00069
tRNA-Pro(G3:U70)	YMR013C	SEC59	sec59-ts	1.16737	0.002	1.1111	0.028	0.04897	0.002	0	status=JK
tRNA-Pro(G3:U70)	YHR122W	CIA2	yhr122w-ph	0.99359	0.011	0.94439	0.026	0.04905	0.011	4e-05	status=JK
tRNA-Pro(G3:U70)	YOR004W	UTP23	utp23-ph	1.25374	0.078	1.20485	0.002	0.04905	0.078	7e-05
tRNA-Pro(G3:U70)	YDR021W	FAL1	fal1-1	0.7202	0.032	0.66982	0.047	0.04928	0.032	0.00066	status=JK
tRNA-Pro(G3:U70)	YLR436C	ECM30		1.22432	0.051	1.17105	0.033	0.04934	0.051	2e-05
tRNA-Pro(G3:U70)	YKR086W	PRP16	prp16-ts	1.08879	0.023	1.03728	0.034	0.0494	0.023	0
tRNA-Pro(G3:U70)	YMR296C	LCB1	lcb1-5	0.9306	0.003	0.87919	0.028	0.05012	0.003	0	status=JK
tRNA-Pro(G3:U70)	YDR334W	SWR1		1.07043	0.059	1.02025	0.002	0.05022	0.059	5e-05
tRNA-Pro(G3:U70)	YGL011C	SCL1	scl1-ph	1.10115	0.015	1.05036	0.007	0.05049	0.015	6e-05	status=JK
tRNA-Pro(G3:U70)	YGR120C	COG2	cog2-1	1.05526	0.007	1.01177	0.014	0.05068	0.007	1e-05	status=JK
tRNA-Pro(G3:U70)	YHR030C	SLT2		0.91785	0.053	0.87476	0.107	0.05097	0.053	5e-05
tRNA-Pro(G3:U70)	YOL144W	NOP8	nop8-101	1.05457	0.006	1.00264	0.009	0.05138	0.006	1e-05	status=JK
tRNA-Pro(G3:U70)	YKL078W	DHR2	dhr2-ph	1.12189	0.046	1.07181	0.004	0.05148	0.046	2e-05
tRNA-Pro(G3:U70)	YJL136C	RPS21B		1.02775	0.011	0.97743	0.02	0.05196	0.011	4e-05	status=JK
tRNA-Pro(G3:U70)	YNL021W	HDA1		1.38032	0.01	1.32418	0.013	0.05198	0.01	2e-05	status=JK
tRNA-Pro(G3:U70)	YOL066C	RIB2	rib2-ph	1.02135	0.042	0.96888	0.022	0.05223	0.042	2e-05
tRNA-Pro(G3:U70)	YGR216C	GPI1	gpi1-1	1.29979	0.04	1.2483	0.082	0.05225	0.04	0.00032	status=JK
tRNA-Pro(G3:U70)	YJR112W	NNF1	nnf1-77	1.18756	0.038	1.13152	0.018	0.05246	0.038	1e-05
tRNA-Pro(G3:U70)	YJR006W	POL31	hys2-ts	0.80602	0.019	0.75488	0.006	0.05249	0.019	0
tRNA-Pro(G3:U70)	YPR088C	SRP54	ypr088c-ph	1.25068	0.062	1.19455	0.012	0.05254	0.062	3e-05
tRNA-Pro(G3:U70)	YML127W	RSC9	rsc9-ph	0.66763	0.011	0.60904	0.008	0.0527	0.011	0
tRNA-Pro(G3:U70)	YKL095W	YJU2	yju2-ph	1.11715	0.008	1.0492	0.074	0.05282	0.008	2e-05	status=JK
tRNA-Pro(G3:U70)	YGR009C	SEC9	sec9-4	0.18389	0.103	0.13584	0.098	0.0529	0.103	0.03789
tRNA-Pro(G3:U70)	YFL034C-B	MOB2	mob2-24	0.92891	0.028	0.87449	0.003	0.05298	0.028	1e-05
tRNA-Pro(G3:U70)	YFL005W	SEC4	sec4-8	1.0821	0.011	1.0364	0.027	0.05313	0.011	0
tRNA-Pro(G3:U70)	YMR112C	MED11	med11-ts	0.3635	0.004	0.30651	0.015	0.05345	0.004	0
tRNA-Pro(G3:U70)	YGR140W	CBF2	cbf2-2	1.18466	0.015	1.12733	0.028	0.05356	0.015	0
tRNA-Pro(G3:U70)	YKL021C	MAK11	mak11-2	0.9963	0.05	0.9384	0.015	0.05376	0.05	4e-05
tRNA-Pro(G3:U70)	YJR007W	SUI2	yjr007w-ph	1.01362	0.087	0.97469	0.066	0.0544	0.087	0.00017
tRNA-Pro(G3:U70)	YOR322C	LDB19		1.14134	0.015	1.08911	0.035	0.05449	0.015	6e-05	status=JK
tRNA-Pro(G3:U70)	YFL029C	CAK1	cak1-23	1.11604	0.044	1.06437	0.012	0.0545	0.044	0.00052	status=JK
tRNA-Pro(G3:U70)	YPL101W	ELP4		1.07187	0.03	1.02339	0.036	0.05453	0.03	1e-05
tRNA-Pro(G3:U70)	YDR293C	SSD1		0.98764	0.032	0.92954	0.004	0.05524	0.032	1e-05
tRNA-Pro(G3:U70)	YIL022W	TIM44	tim44-8	1.13513	0.047	1.08398	0.046	0.05527	0.047	2e-05
tRNA-Pro(G3:U70)	YMR307W	GAS1		1.18554	0.021	1.13941	0.038	0.05531	0.021	0
tRNA-Pro(G3:U70)	YLR193C	UPS1		0.81531	0.024	0.76208	0.022	0.05552	0.024	1e-05
tRNA-Pro(G3:U70)	YCL016C	DCC1		1.16277	0.231	1.11458	0.085	0.05555	0.231	0.00209
tRNA-Pro(G3:U70)	YOL102C	TPT1	yol102c-ph	0.37242	0.436	0.32867	0.38	0.05575	0.436	0.18621
tRNA-Pro(G3:U70)	YER157W	COG3	cog3-2	1.15406	0.049	1.08758	0.049	0.05641	0.049	2e-05
tRNA-Pro(G3:U70)	YHR107C	CDC12	cdc12-1	1.54396	0.007	1.48687	0.005	0.05642	0.007	1e-05	status=JK
tRNA-Pro(G3:U70)	YDR276C	PMP3		1.25056	0.03	1.19235	0.021	0.05672	0.03	0
tRNA-Pro(G3:U70)	YHR036W	BRL1	brl1-k405i	1.15262	0.024	1.09759	0.03	0.05672	0.024	0
tRNA-Pro(G3:U70)	YHR188C	GPI16	gpi16-ph	1.01497	0.074	0.96706	0.069	0.05672	0.074	0.00011
tRNA-Pro(G3:U70)	YER148W	SPT15	spt15-i143n	0.85183	0.066	0.77055	0.153	0.05697	0.066	0.00013
tRNA-Pro(G3:U70)	YER116C	SLX8		0.72439	0.059	0.67163	0.008	0.05703	0.059	0.00015
tRNA-Pro(G3:U70)	YOR260W	GCD1	gcd1-ph	0.77973	0.011	0.72986	0.026	0.0572	0.011	0
tRNA-Pro(G3:U70)	YOR204W	DED1	ded1-f144c	0.17781	0.025	0.12747	0.051	0.05722	0.025	0.00073
tRNA-Pro(G3:U70)	YBR004C	GPI18	ybr004c-ph	1.16428	0.028	1.10184	0.01	0.05758	0.028	0
tRNA-Pro(G3:U70)	YGL055W	OLE1	ole1-m2	0.69308	0.095	0.60375	0.166	0.05771	0.095	0.00069
tRNA-Pro(G3:U70)	YPL255W	BBP1	bbp1-1	1.18854	0.01	1.13012	0.016	0.05782	0.01	3e-05	status=JK
tRNA-Pro(G3:U70)	YBL105C	PKC1	pkc1-3	1.12331	0.057	1.05985	0.024	0.058	0.057	4e-05
tRNA-Pro(G3:U70)	YJL091C	GWT1	gwt1-20	0.97762	0.035	0.92261	0.074	0.05801	0.035	1e-05
tRNA-Pro(G3:U70)	YBR118W	TEF2		1.14169	0.06	1.09103	0.041	0.05821	0.06	4e-05
tRNA-Pro(G3:U70)	YIL118W	RHO3	rho3-1	1.07294	0.054	1.0098	0.011	0.05834	0.054	3e-05
tRNA-Pro(G3:U70)	YLR071C	RGR1	rgr1-100	0.32672	0.019	0.26637	0.005	0.0588	0.019	5e-05
tRNA-Pro(G3:U70)	YLR022C	SDO1	sdo1-vma1-ts	1.11955	0.025	1.06373	0.017	0.05883	0.025	0
tRNA-Pro(G3:U70)	YNL091W	NST1		1.15402	0.068	1.10459	0.022	0.05887	0.068	6e-05
tRNA-Pro(G3:U70)	YMR200W	ROT1	rot1-ph	1.07311	0.04	1.00734	0.025	0.05896	0.04	1e-05
tRNA-Pro(G3:U70)	YPR191W	QCR2		1.07397	0.033	1.01198	0.007	0.05903	0.033	1e-05
tRNA-Pro(G3:U70)	YKL165C	MCD4	mcd4-174	1.09101	0.057	1.02937	0.076	0.05914	0.057	4e-05
tRNA-Pro(G3:U70)	YOR196C	LIP5		1.05779	0.058	1.00153	0.059	0.05916	0.058	4e-05
tRNA-Pro(G3:U70)	YFR031C	SMC2	smc2-8	0.15801	0.073	0.10028	0.044	0.05946	0.073	0.06446	status=JK
tRNA-Pro(G3:U70)	YLR440C	SEC39	sec39-2	1.18723	0.004	1.12233	0.042	0.05949	0.004	0	status=JK
tRNA-Pro(G3:U70)	YDR145W	TAF12	taf12-w486stop	1.00608	0.012	0.94647	0.002	0.05957	0.012	5e-05	status=JK
tRNA-Pro(G3:U70)	YDR341C	YDR341C	ydr341c-ph	1.22569	0.097	1.18723	0.069	0.05975	0.097	0.00013
tRNA-Pro(G3:U70)	YDR196C	CAB5	cab5-1	1.23006	0.008	1.17111	0.026	0.05977	0.008	1e-05	status=JK
tRNA-Pro(G3:U70)	YML015C	TAF11	taf11-ts2	0.95048	0.044	0.89266	0.006	0.05985	0.044	3e-05
tRNA-Pro(G3:U70)	YDR498C	SEC20	sec20-1	0.95481	0.027	0.89575	0.018	0.05987	0.027	1e-05
tRNA-Pro(G3:U70)	YGR246C	BRF1	brf1-w107r	0.16436	0.025	0.09918	0.04	0.06006	0.025	0.00096
tRNA-Pro(G3:U70)	YOR122C	PFY1	pfy1-4	0.95936	0.046	0.87676	0.08	0.06012	0.046	3e-05
tRNA-Pro(G3:U70)	YHR058C	MED6	med6-ts	0.52023	0.009	0.46318	0.015	0.0603	0.009	9e-05	status=JK
tRNA-Pro(G3:U70)	YBR109C	CMD1	cmd1-3	0.48434	0.073	0.40464	0.099	0.06054	0.073	0.00094
tRNA-Pro(G3:U70)	YDR182W	CDC1	cdc1-1	0.32768	0.16	0.27175	0.057	0.06062	0.16	0.02628
tRNA-Pro(G3:U70)	YJR042W	NUP85	yjr042w-ph	1.079	0.016	1.01622	0.005	0.0614	0.016	0
tRNA-Pro(G3:U70)	YPL101W	ELP4		0.95485	0.014	0.90278	0.043	0.06141	0.014	0
tRNA-Pro(G3:U70)	YOR336W	KRE5	kre5-ts2	1.02371	0.009	0.95991	0.022	0.06177	0.009	2e-05	status=JK
tRNA-Pro(G3:U70)	YLR305C	STT4	stt4-4	0.66398	0.005	0.59897	0.009	0.06188	0.005	2e-05	status=JK
tRNA-Pro(G3:U70)	YKL074C	MUD2		1.16798	0.051	1.11365	0.047	0.06193	0.051	2e-05
tRNA-Pro(G3:U70)	YNR011C	PRP2	prp2-1	0.97736	0.024	0.9254	0.044	0.06293	0.024	0
tRNA-Pro(G3:U70)	YOR174W	MED4	med4-54	0.76568	0.025	0.69227	0.047	0.06297	0.025	1e-05
tRNA-Pro(G3:U70)	YKR037C	SPC34	spc34-7	1.07354	0.113	1.01916	0.046	0.06323	0.113	0.00032
tRNA-Pro(G3:U70)	YDR052C	DBF4	dbf4-ts	1.08858	0.007	1.02404	0.02	0.06351	0.007	1e-05	status=JK
tRNA-Pro(G3:U70)	YFR028C	CDC14	cdc14-3	0.83423	0.021	0.76373	0.036	0.06424	0.021	0
tRNA-Pro(G3:U70)	YER125W	RSP5	rsp5-3	1.19651	0.015	1.1416	0.074	0.06427	0.015	0
tRNA-Pro(G3:U70)	YER083C	GET2		1.17592	0.046	1.09431	0.073	0.06476	0.046	2e-05
tRNA-Pro(G3:U70)	YGR195W	SKI6	ski6-ph	1.05157	0.009	0.99709	0.022	0.06476	0.009	2e-05	status=JK
tRNA-Pro(G3:U70)	YKL193C	SDS22	sds22-5	1.24705	0.027	1.17662	0.022	0.06511	0.027	0
tRNA-Pro(G3:U70)	YPL085W	SEC16	sec16-2	1.1341	0.052	1.067	0.038	0.06528	0.052	3e-05
tRNA-Pro(G3:U70)	YGL219C	MDM34		1.05274	0.028	0.98743	0.04	0.06533	0.028	0
tRNA-Pro(G3:U70)	YMR220W	ERG8	erg8-1	1.3714	0.068	1.29263	0.062	0.0657	0.068	3e-05
tRNA-Pro(G3:U70)	YHR067W	HTD2		1.10587	0.021	1.03949	0.003	0.066	0.021	0
tRNA-Pro(G3:U70)	YPL175W	SPT14	spt14-1-10c	0.42412	0.139	0.3842	0.113	0.066	0.138	0.00877
tRNA-Pro(G3:U70)	YFL039C	ACT1	act1-111	1.18439	0.042	1.11681	0.012	0.0669	0.042	1e-05
tRNA-Pro(G3:U70)	YGL022W	STT3	stt3-7	1.04658	0.049	0.98361	0.024	0.0671	0.049	3e-05
tRNA-Pro(G3:U70)	YPR086W	SUA7	sua7-c149r	0.64882	0.091	0.57995	0.058	0.06732	0.091	0.00074
tRNA-Pro(G3:U70)	YPL217C	BMS1	bms1-1	0.50454	0.077	0.44902	0.081	0.06804	0.077	0.00095
tRNA-Pro(G3:U70)	YHR058C	MED6	med6-ph	0.8486	0.007	0.7838	0.027	0.06811	0.007	2e-05	status=JK
tRNA-Pro(G3:U70)	YDR328C	SKP1	skp1-3	1.14215	0.081	1.07137	0.066	0.06824	0.081	0.0001
tRNA-Pro(G3:U70)	YFL034C-B	MOB2	mob2-22	0.96639	0.029	0.89732	0.019	0.06848	0.029	1e-05
tRNA-Pro(G3:U70)	YDR531W	CAB1	cab1-ph	0.8987	0.052	0.82673	0.045	0.06909	0.052	5e-05
tRNA-Pro(G3:U70)	YHR189W	PTH1		1.17275	0.021	1.10448	0.006	0.06942	0.021	0
tRNA-Pro(G3:U70)	YNR010W	CSE2		0.70172	0.058	0.63411	0.024	0.06968	0.058	0.00015
tRNA-Pro(G3:U70)	YLR298C	YHC1	yhc1-1	1.27212	0.004	1.19936	0.037	0.06977	0.004	0	status=JK
tRNA-Pro(G3:U70)	YDR088C	SLU7	slu7-ts2	0.43014	0.048	0.35998	0.006	0.07003	0.048	0.00037
tRNA-Pro(G3:U70)	YDR164C	SEC1	sec1-1	1.23144	0.028	1.15643	0.022	0.07012	0.028	0
tRNA-Pro(G3:U70)	YGL115W	SNF4		1.20739	0.015	1.14322	0.031	0.07058	0.015	0
tRNA-Pro(G3:U70)	YPL101W	ELP4		0.98002	0.04	0.90866	0.06	0.07066	0.04	2e-05
tRNA-Pro(G3:U70)	YAL041W	CDC24	cdc24-4	1.1238	0.018	1.05642	0.046	0.07083	0.018	0
tRNA-Pro(G3:U70)	YBL093C	ROX3	rox3-182	0.26406	0.066	0.19293	0.017	0.07102	0.066	0.00402
tRNA-Pro(G3:U70)	YGL091C	NBP35	nbp35-ph	0.81351	0.013	0.73876	0.049	0.07116	0.013	0
tRNA-Pro(G3:U70)	YER093C	TSC11	tsc11-5	0.97897	0.063	0.90914	0.004	0.07142	0.063	7e-05
tRNA-Pro(G3:U70)	YGL142C	GPI10	gpi10-ph	1.05377	0.008	0.97276	0.035	0.07148	0.008	2e-05	status=JK
tRNA-Pro(G3:U70)	YPL233W	NSL1	nsl1-6	1.37191	0.112	1.28694	0.027	0.07235	0.111	0.00015
tRNA-Pro(G3:U70)	YLR026C	SED5	sed5-1	0.90137	0.03	0.82087	0.033	0.07269	0.03	1e-05
tRNA-Pro(G3:U70)	YOR184W	SER1		1.15391	0.044	1.07945	0.049	0.07312	0.044	1e-05
tRNA-Pro(G3:U70)	YHR164C	DNA2	dna2-1	0.8817	0.037	0.80942	0.023	0.07314	0.037	2e-05
tRNA-Pro(G3:U70)	YFL034C-B	MOB2	mob2-20	1.02427	0.138	0.94653	0.08	0.07421	0.138	0.00066
tRNA-Pro(G3:U70)	YIL126W	STH1	sth1-2	0.19825	0.035	0.16535	0.139	0.07429	0.035	0.01013	status=JK
tRNA-Pro(G3:U70)	YOR143C	THI80	thi80-ph	1.18894	0.039	1.1136	0.01	0.07435	0.039	1e-05
tRNA-Pro(G3:U70)	YMR308C	PSE1	pse1-34	0.19475	0.052	0.13024	0.039	0.07439	0.052	0.02279	status=JK
tRNA-Pro(G3:U70)	YJL097W	PHS1	phs1-1	1.2976	0.041	1.21791	0.058	0.07513	0.041	1e-05
tRNA-Pro(G3:U70)	YOL130W	ALR1	yol130w-ph	0.53336	0.05	0.45588	0.049	0.07525	0.05	0.00023
tRNA-Pro(G3:U70)	YKR037C	SPC34	spc34-5	1.09077	0.018	1.01996	0.076	0.07526	0.018	9e-05	status=JK
tRNA-Pro(G3:U70)	YAL041W	CDC24	cdc24-11	1.14266	0.07	1.05715	0.063	0.07554	0.07	6e-05
tRNA-Pro(G3:U70)	YHR111W	UBA4		1.01688	0.046	0.94889	0.014	0.07581	0.046	3e-05
tRNA-Pro(G3:U70)	YCL052C	PBN1	pbn1-ph	1.09212	0.08	1.01456	0.013	0.07614	0.08	0.00011
tRNA-Pro(G3:U70)	YLR002C	NOC3	noc3-ph	0.55351	0.214	0.48096	0.172	0.07618	0.214	0.01407
tRNA-Pro(G3:U70)	YJL072C	PSF2	yjl072c-ph	1.23388	0.05	1.15384	0.038	0.07622	0.05	2e-05
tRNA-Pro(G3:U70)	YDR168W	CDC37	cdc37-1	1.21796	0.024	1.14593	0.029	0.07683	0.024	0
tRNA-Pro(G3:U70)	YNL138W	SRV2	srv2-2	0.79537	0.032	0.72056	0.005	0.0769	0.032	2e-05
tRNA-Pro(G3:U70)	YML128C	MSC1		0.95675	0.059	0.87337	0.032	0.07764	0.058	6e-05
tRNA-Pro(G3:U70)	YBR164C	ARL1		1.17248	0.036	1.08891	0.03	0.07785	0.036	1e-05
tRNA-Pro(G3:U70)	YDL077C	VAM6		0.87396	0.061	0.79944	0.009	0.07812	0.061	9e-05
tRNA-Pro(G3:U70)	YBR123C	TFC1	tfc1-e447k	1.23882	0.08	1.17617	0.067	0.07824	0.08	7e-05
tRNA-Pro(G3:U70)	YBL105C	PKC1	pkc1-1	1.28595	0.035	1.21289	0.023	0.07829	0.035	1e-05
tRNA-Pro(G3:U70)	YDR463W	STP1		1.03929	0.015	0.95855	0.017	0.07839	0.015	0
tRNA-Pro(G3:U70)	YER155C	BEM2		1.00525	0.067	0.92373	0.021	0.07843	0.067	8e-05
tRNA-Pro(G3:U70)	YDR299W	BFR2	bfr2-ph	0.69491	0.067	0.61412	0.006	0.07844	0.067	0.00024
tRNA-Pro(G3:U70)	YDL098C	SNU23	snu23-ph	1.02827	0.054	0.95481	0.049	0.07889	0.054	4e-05
tRNA-Pro(G3:U70)	YLR218C	COA4		1.03064	0.058	0.94771	0.021	0.07937	0.058	5e-05
tRNA-Pro(G3:U70)	YHR191C	CTF8	ctf8-9	0.83983	0.033	0.75543	0.113	0.0795	0.033	2e-05
tRNA-Pro(G3:U70)	YFL034C-B	MOB2	mob2-14	1.05466	0.111	0.93267	0.168	0.07957	0.111	0.00032
tRNA-Pro(G3:U70)	YIL083C	CAB2	yil083c-ph	1.22406	0.028	1.14461	0.028	0.07979	0.027	0
tRNA-Pro(G3:U70)	YBR193C	MED8	med8-51	0.82166	0.052	0.74086	0.009	0.08025	0.052	7e-05
tRNA-Pro(G3:U70)	YDL030W	PRP9	prp9-ts	0.52286	0.015	0.46078	0.155	0.0804	0.015	0.00027	status=JK
tRNA-Pro(G3:U70)	YGR119C	NUP57	nup57-e17	0.92116	0.055	0.83442	0.033	0.0815	0.055	6e-05
tRNA-Pro(G3:U70)	YDR052C	DBF4	dbf4-4	1.35673	0.004	1.26155	0.049	0.08155	0.004	0	status=JK
tRNA-Pro(G3:U70)	YOL001W	PHO80		1.28472	0.007	1.20834	0.023	0.08171	0.007	1e-05	status=JK
tRNA-Pro(G3:U70)	YBR126C	TPS1		1.1273	0.015	1.03457	0.071	0.08228	0.015	6e-05	status=JK
tRNA-Pro(G3:U70)	YDR208W	MSS4	mss4-103	1.13053	0.036	1.04625	0.008	0.08236	0.036	1e-05
tRNA-Pro(G3:U70)	YKR082W	NUP133		1.2477	0.01	1.16878	0.051	0.0841	0.01	2e-05	status=JK
tRNA-Pro(G3:U70)	YNR017W	TIM23	tim23-ph	0.90802	0.033	0.81851	0.019	0.08415	0.032	1e-05
tRNA-Pro(G3:U70)	YKL048C	ELM1		1.23088	0.043	1.13537	0.08	0.08469	0.043	1e-05
tRNA-Pro(G3:U70)	YDL015C	TSC13	tsc13-ph	0.94311	0.098	0.84346	0.076	0.08544	0.098	0.00031
tRNA-Pro(G3:U70)	YOR123C	LEO1		1.01441	0.004	0.92852	0.026	0.08562	0.004	1e-05	status=JK
tRNA-Pro(G3:U70)	YKL049C	CSE4	cse4-1	1.22876	0.013	1.14283	0.042	0.08632	0.013	4e-05	status=JK
tRNA-Pro(G3:U70)	YLL031C	GPI13	gpi13-5	1.16104	0.064	1.07695	0.031	0.08672	0.064	5e-05
tRNA-Pro(G3:U70)	YKR062W	TFA2	tfa2-45	0.18971	0.017	0.11391	0.133	0.08797	0.017	0.00268	status=JK
tRNA-Pro(G3:U70)	YKL052C	ASK1	ask1-3	1.23915	0.015	1.14506	0.024	0.08838	0.015	0
tRNA-Pro(G3:U70)	YBL097W	BRN1	brn1-9	0.37419	0.142	0.28194	0.101	0.0885	0.141	0.0132
tRNA-Pro(G3:U70)	YLR029C	RPL15A	ylr029c-ph	1.04651	0.066	0.95829	0.026	0.08904	0.066	7e-05
tRNA-Pro(G3:U70)	YDR052C	DBF4	dbf4-1	1.06248	0.115	0.98127	0.031	0.0895	0.115	0.00034
tRNA-Pro(G3:U70)	YBL084C	CDC27	cdc27-1	1.08004	0.041	0.98788	0.018	0.08958	0.041	1e-05
tRNA-Pro(G3:U70)	YJL174W	KRE9	yjl174w-ph	1.19836	0.02	1.10552	0.023	0.09023	0.02	0
tRNA-Pro(G3:U70)	YMR239C	RNT1	rnt1-ts	1.38399	0.005	1.28065	0.049	0.09071	0.005	0	status=JK
tRNA-Pro(G3:U70)	YKL089W	MIF2	mif2-3	0.94885	0.012	0.86885	0.068	0.09132	0.012	5e-05	status=JK
tRNA-Pro(G3:U70)	YMR235C	RNA1	rna1-s116f	0.92782	0.028	0.82867	0.02	0.09191	0.028	1e-05
tRNA-Pro(G3:U70)	YLR384C	IKI3		1.05141	0.014	0.96233	0.018	0.09426	0.014	6e-05	status=JK
tRNA-Pro(G3:U70)	YKL024C	URA6	ura6-4	1.13713	0.069	1.04174	0.041	0.09438	0.069	6e-05
tRNA-Pro(G3:U70)	YBR175W	SWD3		0.94508	0.015	0.85402	0.03	0.09447	0.015	9e-05	status=JK
tRNA-Pro(G3:U70)	YKL125W	RRN3	rrn3-s213p	1.02509	0.005	0.94079	0.035	0.0945	0.005	1e-05	status=JK
tRNA-Pro(G3:U70)	YLR045C	STU2	stu2-12	1.45641	0.062	1.35738	0.009	0.09626	0.062	2e-05
tRNA-Pro(G3:U70)	YGR277C	CAB4	cab4-ph	0.97385	0.038	0.87948	0.035	0.09636	0.038	0.00051	status=JK
tRNA-Pro(G3:U70)	YNL136W	EAF7		1.15049	0.101	1.04917	0.041	0.0972	0.101	0.00018
tRNA-Pro(G3:U70)	YJL097W	PHS1	phs1-ph	1.35804	0.067	1.26847	0.038	0.0981	0.067	3e-05
tRNA-Pro(G3:U70)	YLL031C	GPI13	gpi13-3	0.9291	0.047	0.818	0.085	0.10023	0.047	4e-05
tRNA-Pro(G3:U70)	YLR452C	SST2		1.08091	0.035	0.97902	0.106	0.10138	0.035	1e-05
tRNA-Pro(G3:U70)	YIL147C	SLN1	sln1-ts4	1.11516	0.161	0.9961	0.038	0.1016	0.161	0.00082
tRNA-Pro(G3:U70)	YDL017W	CDC7	cdc7-1	1.09972	0.008	0.99296	0.044	0.10177	0.008	2e-05	status=JK
tRNA-Pro(G3:U70)	YMR197C	VTI1	vti1-2	1.12423	0.04	1.01998	0.053	0.1024	0.04	1e-05
tRNA-Pro(G3:U70)	YFL037W	TUB2	tub2-443	1.34972	0.041	1.23612	0.037	0.10242	0.041	1e-05
tRNA-Pro(G3:U70)	YBL105C	PKC1	pkc1-4	0.9386	0.04	0.83592	0.019	0.10282	0.04	2e-05
tRNA-Pro(G3:U70)	YHR191C	CTF8	ctf8-162	0.8459	0.024	0.74475	0.066	0.10288	0.024	1e-05
tRNA-Pro(G3:U70)	YDL108W	KIN28	kin28-ts	0.9234	0.032	0.80205	0.181	0.10336	0.032	0.00041	status=JK
tRNA-Pro(G3:U70)	YJL025W	RRN7	rrn7-ph	1.004	0.053	0.87889	0.082	0.10361	0.053	4e-05
tRNA-Pro(G3:U70)	YDR052C	DBF4	dbf4-3	1.27098	0.06	1.16726	0.115	0.10376	0.06	3e-05
tRNA-Pro(G3:U70)	YDR302W	GPI11	gpi11-ph	0.99926	0.01	0.89801	0.015	0.10422	0.01	3e-05	status=JK
tRNA-Pro(G3:U70)	YKL024C	URA6	ura6-6	1.01982	0.027	0.89784	0.073	0.10501	0.027	1e-05
tRNA-Pro(G3:U70)	YLR314C	CDC3	cdc3-1	1.27797	0.018	1.17078	0.054	0.10772	0.018	7e-05	status=JK
tRNA-Pro(G3:U70)	YPL211W	NIP7	nip7-1	0.73517	0.167	0.62818	0.005	0.10947	0.167	0.0031
tRNA-Pro(G3:U70)	YGL130W	CEG1	ceg1-ts	0.91156	0.021	0.80303	0.012	0.10951	0.021	0.00018	status=JK
tRNA-Pro(G3:U70)	YAL013W	DEP1		1.19831	0.014	1.08227	0.034	0.11041	0.014	0
tRNA-Pro(G3:U70)	YLR383W	SMC6	smc6-9	1.26907	0.052	1.16233	0.06	0.11117	0.052	2e-05
tRNA-Pro(G3:U70)	YOR057W	SGT1	sgt1-3	1.15061	0.046	1.03891	0.023	0.1113	0.046	2e-05
tRNA-Pro(G3:U70)	YDL003W	MCD1	ydl003w-ph	0.97255	0.012	0.86124	0.025	0.11207	0.012	5e-05	status=JK
tRNA-Pro(G3:U70)	YBR060C	ORC2	orc2-4	1.04803	0.024	0.91754	0.094	0.11344	0.024	0.00018	status=JK
tRNA-Pro(G3:U70)	YHR030C	SLT2		1.03704	0.016	0.92683	0.037	0.11451	0.016	0	status=JK
tRNA-Pro(G3:U70)	YPL028W	ERG10	erg10-1	1.05284	0.013	0.93063	0.02	0.11496	0.013	5e-05	status=JK
tRNA-Pro(G3:U70)	YDR288W	NSE3	nse3-ts3	0.985	0.014	0.8662	0.015	0.11553	0.014	7e-05	status=JK
tRNA-Pro(G3:U70)	YAR019C	CDC15	cdc15-2	0.97042	0.057	0.82974	0.141	0.11559	0.057	6e-05
tRNA-Pro(G3:U70)	YCR077C	PAT1		1.20182	0.025	1.08682	0.016	0.11623	0.025	0
tRNA-Pro(G3:U70)	YFR036W	CDC26	cdc26-1	1.31647	0.073	1.19853	0.011	0.11644	0.073	5e-05
tRNA-Pro(G3:U70)	YOL034W	SMC5	smc5-6	1.1314	0.004	1.01016	0.043	0.11782	0.004	0	status=JK
tRNA-Pro(G3:U70)	YML081C-A	ATP18		1.117	0.05	1.00574	0.07	0.1198	0.05	2e-05
tRNA-Pro(G3:U70)	YDR478W	SNM1	snm1-ph	0.17074	0.066	0.05306	0.054	0.12017	0.066	0.04603	status=JK
tRNA-Pro(G3:U70)	YLR268W	SEC22	sec22-3	1.01577	0.046	0.90333	0.047	0.12213	0.046	2e-05
tRNA-Pro(G3:U70)	YDR280W	RRP45	rrp45-ph	1.46805	0.023	1.33966	0.093	0.12302	0.023	8e-05	status=JK
tRNA-Pro(G3:U70)	YDR168W	CDC37	cdc37-ts	1.09566	0.037	0.97957	0.089	0.12324	0.037	1e-05
tRNA-Pro(G3:U70)	YHR058C	MED6	med6-ts	0.52051	0.059	0.40247	0.039	0.12327	0.059	0.00039
tRNA-Pro(G3:U70)	YPL093W	NOG1	nog1-1	0.92689	0.028	0.79002	0.073	0.12689	0.028	0.0003	status=JK
tRNA-Pro(G3:U70)	YPR034W	ARP7	arp7-e411k	0.51371	0.017	0.33839	0.248	0.12727	0.017	0.00036	status=JK
tRNA-Pro(G3:U70)	YBR135W	CKS1	cks1-38	1.01909	0.095	0.89499	0.016	0.12797	0.095	0.00022
tRNA-Pro(G3:U70)	YBR109C	CMD1	cmd1-8	1.22596	0.036	1.10714	0.057	0.12865	0.036	1e-05
tRNA-Pro(G3:U70)	YJR054W	KCH1		0.21573	0.147	0.13387	0.101	0.13077	0.147	0.06087
tRNA-Pro(G3:U70)	YDR288W	NSE3	nse3-ts4	1.21089	0.022	1.07859	0.06	0.13088	0.022	0
tRNA-Pro(G3:U70)	YOR335C	ALA1	ala1-1	1.05405	0.032	0.93488	0.089	0.1315	0.032	1e-05
tRNA-Pro(G3:U70)	YBR236C	ABD1	abd1-5	1.1146	0.077	1.00282	0.036	0.1318	0.077	0.00159	status=JK
tRNA-Pro(G3:U70)	YFL034C-B	MOB2	mob2-28	0.85064	0.274	0.68194	0.317	0.1321	0.274	0.0084
tRNA-Pro(G3:U70)	YER168C	CCA1	cca1-ph	0.79337	0.011	0.66917	0.042	0.13306	0.01	6e-05	status=JK
tRNA-Pro(G3:U70)	YER133W	GLC7	glc7-10	1.0178	0.002	0.87842	0.052	0.13399	0.002	0	status=JK
tRNA-Pro(G3:U70)	YDR404C	RPB7	ydr404c-ph	0.13493	0.01	0.01412	0.024	0.13481	0.01	0.00197	status=JK
tRNA-Pro(G3:U70)	YGL112C	TAF6	taf6-ts	1.02269	0.029	0.88332	0.047	0.13514	0.029	1e-05
tRNA-Pro(G3:U70)	YPR168W	NUT2	nut2-ts	0.70367	0.008	0.56546	0.025	0.13626	0.008	0
tRNA-Pro(G3:U70)	YML105C	SEC65	sec65-1	0.98875	0.024	0.858	0.02	0.13628	0.024	0.0002	status=JK
tRNA-Pro(G3:U70)	YKL112W	ABF1	abf1-103	0.29538	0.14	0.14622	0.087	0.13653	0.139	0.02416
tRNA-Pro(G3:U70)	YDR245W	MNN10		0.67108	0.025	0.52803	0.038	0.13904	0.025	1e-05
tRNA-Pro(G3:U70)	YGR006W	PRP18	prp18-1202	0.62229	0.005	0.47385	0.102	0.1412	0.005	2e-05	status=JK
tRNA-Pro(G3:U70)	YBR070C	ALG14	alg14-ph	0.88616	0.025	0.74237	0.005	0.14219	0.025	1e-05
tRNA-Pro(G3:U70)	YDR398W	UTP5	ydr398w-ph	0.87532	0.051	0.74564	0.112	0.14255	0.051	0.00114	status=JK
tRNA-Pro(G3:U70)	YMR296C	LCB1	lcb1-10	0.49724	0.267	0.38354	0.14	0.1438	0.266	0.03355
tRNA-Pro(G3:U70)	YNR026C	SEC12	sec12-1	1.11433	0.041	0.96173	0.062	0.14621	0.041	0.00046	status=JK
tRNA-Pro(G3:U70)	YMR239C	RNT1	rnt1-47	1.20214	0.055	1.05666	0.002	0.14622	0.055	3e-05
tRNA-Pro(G3:U70)	YBL105C	PKC1	pkc1-2	1.12552	0.013	0.98573	0.05	0.14775	0.013	0
tRNA-Pro(G3:U70)	YOR236W	DFR1	dfr1-td	0.70599	0.152	0.574	0.045	0.1491	0.151	0.00262
tRNA-Pro(G3:U70)	YPR165W	RHO1	rho1-td	0.98451	0.019	0.85292	0.071	0.15181	0.019	0
tRNA-Pro(G3:U70)	YDR126W	SWF1		1.13376	0.097	0.9733	0.053	0.15334	0.097	0.00017
tRNA-Pro(G3:U70)	YDR311W	TFB1	tfb1-6	0.67783	0.03	0.53413	0.183	0.15339	0.03	2e-05
tRNA-Pro(G3:U70)	YLR310C	CDC25	cdc25-1	0.30908	0.198	0.29726	0.258	0.15478	0.198	0.11363	status=JK
tRNA-Pro(G3:U70)	YPR103W	PRE2	pre2-2	1.11064	0.08	0.96267	0.105	0.15769	0.08	0.0001
tRNA-Pro(G3:U70)	YDR378C	LSM6		1.2881	0.026	1.12544	0.024	0.16725	0.026	0
tRNA-Pro(G3:U70)	YHR069C	RRP4	rrp4-1	0.98128	0.046	0.82075	0.1	0.16845	0.046	0.00074	status=JK
tRNA-Pro(G3:U70)	YIL040W	APQ12		0.94045	0.08	0.75831	0.077	0.17009	0.08	0.00017
tRNA-Pro(G3:U70)	YHR036W	BRL1	brl1-3231	1.38511	0.023	1.21277	0.04	0.17208	0.023	9e-05	status=JK
tRNA-Pro(G3:U70)	YBR110W	ALG1	alg1-1	1.38812	0.039	1.21551	0.035	0.17242	0.039	1e-05
tRNA-Pro(G3:U70)	YMR197C	VTI1	vti1-11	1.11089	0.072	0.93073	0.031	0.17294	0.072	8e-05
tRNA-Pro(G3:U70)	YJL002C	OST1	ost1-6	1.19357	0.015	1.06283	0.162	0.17315	0.015	0
tRNA-Pro(G3:U70)	YJL074C	SMC3	smc3-1	1.18412	0.054	0.99963	0.017	0.18497	0.054	3e-05
tRNA-Pro(G3:U70)	YJL125C	GCD14	gcd14-4	0.52572	0.124	0.3814	0.228	0.19327	0.124	0.00347
tRNA-Pro(G3:U70)	YGR002C	SWC4	swc4-4	0.64677	0.188	0.39936	0.312	0.19432	0.188	0.00631
tRNA-Pro(G3:U70)	YBL034C	STU1	stu1-7	0.19647	0.142	0	0	0.19629	0.142	0.06974
tRNA-Pro(G3:U70)	YDR288W	NSE3	nse3-ph	0.97952	0.054	0.77766	0.031	0.19649	0.054	5e-05
tRNA-Pro(G3:U70)	YLR197W	NOP56	nop56-ph	0.83917	0.008	0.66694	0.105	0.20043	0.008	3e-05	status=JK
tRNA-Pro(G3:U70)	YMR005W	TAF4	taf4-18	0.84714	0.111	0.62922	0.127	0.20119	0.11	0.0006
tRNA-Pro(G3:U70)	YHR052W	CIC1	cic1-2	0.83723	0.08	0.63689	0.076	0.20264	0.079	0.00023
tRNA-Pro(G3:U70)	YGR264C	MES1	mes1-1	0.73205	0.004	0.50708	0.035	0.20916	0.004	1e-05	status=JK
tRNA-Pro(G3:U70)	YMR296C	LCB1	lcb1-4	0.79822	0.023	0.62086	0.132	0.21035	0.023	1e-05
tRNA-Pro(G3:U70)	YLR272C	YCS4	ycs4-1	0.22681	0.045	0.01608	0.016	0.21039	0.045	0.01263	status=JK
tRNA-Pro(G3:U70)	YIL106W	MOB1	yil106w-ph	0.77989	0.032	0.56309	0.036	0.21288	0.032	2e-05
tRNA-Pro(G3:U70)	YKL013C	ARC19	ykl013c-ph	0.21818	0.309	0	0	0.21799	0.309	0.25281
tRNA-Pro(G3:U70)	YGR158C	MTR3	mtr3-ts	0.62822	0.17	0.43623	0.148	0.21995	0.17	0.00512
tRNA-Pro(G3:U70)	YLL036C	PRP19	prp19-1	1.10523	0.017	0.84788	0.137	0.22164	0.017	8e-05	status=JK
tRNA-Pro(G3:U70)	YFR027W	ECO1	eco1-1	0.95824	0.029	0.71712	0.023	0.23543	0.029	1e-05
tRNA-Pro(G3:U70)	YBR155W	CNS1	cns1-1	0.41685	0.093	0.18441	0.019	0.24168	0.093	0.00297
tRNA-Pro(G3:U70)	YPR016C	TIF6	ypr016c-ph	0.9755	0.014	0.67129	0.235	0.24743	0.014	7e-05	status=JK
tRNA-Pro(G3:U70)	YLL031C	GPI13	gpi13-4	0.40495	0.185	0.14091	0.061	0.25396	0.184	0.0219
tRNA-Pro(G3:U70)	YBR011C	IPP1	ipp1-ph	0.25703	0.3	0	0	0.25681	0.3	0.18558
tRNA-Pro(G3:U70)	YGL075C	MPS2	mps2-1	0.5099	0.199	0.24139	0.045	0.2579	0.199	0.01435
tRNA-Pro(G3:U70)	YKL042W	SPC42	spc42-11	1.42259	0.015	1.16315	0.017	0.25969	0.015	4e-05	status=JK
tRNA-Pro(G3:U70)	YJR065C	ARP3	arp3-g302y	0.278	0.228	0.06647	0.102	0.26168	0.227	0.0923
tRNA-Pro(G3:U70)	YKL024C	URA6	ura6-5	0.78089	0.038	0.50425	0.057	0.26369	0.038	0.0008	status=JK
tRNA-Pro(G3:U70)	YGR101W	PCP1		0.88489	0.041	0.60835	0.161	0.27189	0.041	3e-05
tRNA-Pro(G3:U70)	YFR005C	SAD1	sad1-1	0.98506	0.062	0.70068	0.045	0.27314	0.062	7e-05
tRNA-Pro(G3:U70)	YAL041W	CDC24	cdc24-3	0.70632	0.508	0.49565	0.371	0.27695	0.507	0.06887
tRNA-Pro(G3:U70)	YGR074W	SMD1	smd1-1	0.53597	0.215	0.27778	0.117	0.27818	0.215	0.01557
tRNA-Pro(G3:U70)	YFL001W	DEG1		1.02939	0.003	0.75523	0.087	0.2798	0.003	0	status=JK
tRNA-Pro(G3:U70)	YMR296C	LCB1	lcb1-2	0.74888	0.194	0.45238	0.076	0.2863	0.194	0.00451
tRNA-Pro(G3:U70)	YFL017C	GNA1	gna1-ts	0.69467	0.102	0.37862	0.03	0.3099	0.102	0.00086
tRNA-Pro(G3:U70)	YNL006W	LST8	lst8-6	0.77061	0.199	0.45673	0.383	0.32417	0.199	0.0045
tRNA-Pro(G3:U70)	YBR198C	TAF5	taf5-20	1.04489	0.067	0.6985	0.033	0.33872	0.067	7e-05
tRNA-Pro(G3:U70)	YER148W	SPT15	spt15-p65s	0.76189	0.041	0.40158	0.386	0.36147	0.041	4e-05
tRNA-Pro(G3:U70)	YLR100W	ERG27	erg27-ph	1.09839	0.004	0.74508	0.072	0.37388	0.004	1e-05	status=JK
tRNA-Pro(G3:U70)	YDR167W	TAF10	taf10-ts34	0.59635	0.093	0.2297	0.213	0.38638	0.093	0.00104
tRNA-Pro(G3:U70)	YDR460W	TFB3	tfb3-ts	0.57199	0.449	0.17171	0.022	0.39851	0.449	0.08421
tRNA-Pro(G3:U70)	YHR024C	MAS2	mas2-10	0.69014	0.172	0.28747	0.086	0.41277	0.172	0.00407
tRNA-Pro(G3:U70)	YJL019W	MPS3	mps3-1	0.7757	0.429	0.39131	0.403	0.42161	0.428	0.03631
tRNA-Pro(G3:U70)	YMR093W	UTP15	ymr093w-ph	0.60454	0.187	0.19401	0.247	0.47419	0.187	0.00755
tRNA-Pro(G3:U70)	YDL190C	UFD2		#NUM!	#NUM!	#NUM!	#NUM!	#NUM!	#NUM!	#NUM!	status=LK
tRNA-Pro(G3:U70)	YEL026W	SNU13	snu13-ph	#NUM!	#NUM!	#NUM!	#NUM!	#NUM!	#NUM!	#NUM!	status=LK
tRNA-Pro(G3:U70)	YEL032W	MCM3	mcm3-1	#NUM!	#NUM!	#NUM!	#NUM!	#NUM!	#NUM!	#NUM!	status=LK
tRNA-Pro(G3:U70)	YNL282W	POP3	pop3-ph	#NUM!	#NUM!	#NUM!	#NUM!	#NUM!	#NUM!	#NUM!	status=LK
tRNA-Pro(G3:U70)	YNL312W	RFA2	rfa2-ph	#NUM!	#NUM!	#NUM!	#NUM!	#NUM!	#NUM!	#NUM!	status=LK
tRNA-Pro(G3:U70)	YNL247W	YNL247W	ynl247w-ph	#NUM!	#NUM!	#NUM!	#NUM!	#NUM!	#NUM!	#NUM!	status=LK
tRNA-Pro(G3:U70)	YDL164C	CDC9	cdc9-1	#NUM!	#NUM!	#NUM!	#NUM!	#NUM!	#NUM!	#NUM!	status=LK
tRNA-Pro(G3:U70)	YNL261W	ORC5	orc5-70	#NUM!	#NUM!	#NUM!	#NUM!	#NUM!	#NUM!	#NUM!	status=LK
tRNA-Pro(G3:U70)	YER022W	SRB4	srb4-2	#NUM!	#NUM!	#NUM!	#NUM!	#NUM!	#NUM!	#NUM!	status=LK
tRNA-Pro(G3:U70)	YEL055C	POL5	pol5-3	#NUM!	#NUM!	#NUM!	#NUM!	#NUM!	#NUM!	#NUM!	status=LK
tRNA-Pro(G3:U70)	YDL145C	COP1	cop1-1	#NUM!	#NUM!	#NUM!	#NUM!	#NUM!	#NUM!	#NUM!	status=LK
tRNA-Pro(G3:U70)	YDL126C	CDC48	cdc48-4601	#NUM!	#NUM!	#NUM!	#NUM!	#NUM!	#NUM!	#NUM!	status=LK
tRNA-Pro(G3:U70)	YNL222W	SSU72	ssu72-2	#NUM!	#NUM!	#NUM!	#NUM!	#NUM!	#NUM!	#NUM!	status=LK
tRNA-Pro(G3:U70)	BLANK	BLANK		0	0	0	0	#NUM!	#NUM!	#NUM!
tRNA-Pro(G3:U70)	YDL192W	ARF1		#NUM!	#NUM!	#NUM!	#NUM!	#NUM!	#NUM!	#NUM!	status=LK
tRNA-Pro(G3:U70)	YDL147W	RPN5	rpn5-1	#NUM!	#NUM!	#NUM!	#NUM!	#NUM!	#NUM!	#NUM!	status=LK
tRNA-Pro(G3:U70)	YDL209C	CWC2	cwc2-1	#NUM!	#NUM!	#NUM!	#NUM!	#NUM!	#NUM!	#NUM!	status=LK
tRNA-Pro(G3:U70)	YNL163C	RIA1	ria1-ts	#NUM!	#NUM!	#NUM!	#NUM!	#NUM!	#NUM!	#NUM!	status=LK
tRNA-Pro(G3:U70)	YER003C	PMI40	pmi40-ph	#NUM!	#NUM!	#NUM!	#NUM!	#NUM!	#NUM!	#NUM!	status=LK
tRNA-Pro(G3:U70)	YER023W	PRO3	pro3-ph	#NUM!	#NUM!	#NUM!	#NUM!	#NUM!	#NUM!	#NUM!	status=LK
tRNA-Pro(G3:U70)	YER009W	NTF2	ntf2-ph	#NUM!	#NUM!	#NUM!	#NUM!	#NUM!	#NUM!	#NUM!	status=LK
tRNA-Pro(G3:U70)	YNL267W	PIK1	pik1-104	#NUM!	#NUM!	#NUM!	#NUM!	#NUM!	#NUM!	#NUM!	status=LK
tRNA-Pro(G3:U70)	YNL267W	PIK1	pik1-139	#NUM!	#NUM!	#NUM!	#NUM!	#NUM!	#NUM!	#NUM!	status=LK
tRNA-Pro(G3:U70)	YDL126C	CDC48	cdc48-3	#NUM!	#NUM!	#NUM!	#NUM!	#NUM!	#NUM!	#NUM!	status=LK
tRNA-Pro(G3:U70)	YER009W	NTF2	ntf2-h104y	#NUM!	#NUM!	#NUM!	#NUM!	#NUM!	#NUM!	#NUM!	status=LK
tRNA-Pro(G3:U70)	YNL287W	SEC21	sec21-1	#NUM!	#NUM!	#NUM!	#NUM!	#NUM!	#NUM!	#NUM!	status=LK
tRNA-Pro(G3:U70)	YNL216W	RAP1	rap1-2	#NUM!	#NUM!	#NUM!	#NUM!	#NUM!	#NUM!	#NUM!	status=LK
tRNA-Pro(G3:U70)	YNL272C	SEC2	sec2-41	#NUM!	#NUM!	#NUM!	#NUM!	#NUM!	#NUM!	#NUM!	status=LK
tRNA-Pro(G3:U70)	YEL002C	WBP1	wbp1-2	#NUM!	#NUM!	#NUM!	#NUM!	#NUM!	#NUM!	#NUM!	status=LK
tRNA-Pro(G3:U70)	YEL002C	WBP1	wbp1-1	#NUM!	#NUM!	#NUM!	#NUM!	#NUM!	#NUM!	#NUM!	status=LK
tRNA-Pro(G3:U70)	YDL217C	TIM22	tim22-19	#NUM!	#NUM!	#NUM!	#NUM!	#NUM!	#NUM!	#NUM!	status=LK
tRNA-Pro(G3:U70)	YEL034W	HYP2	hyp2-1	#NUM!	#NUM!	#NUM!	#NUM!	#NUM!	#NUM!	#NUM!	status=LK
tRNA-Pro(G3:U70)	YEL034W	HYP2	hyp2-3	#NUM!	#NUM!	#NUM!	#NUM!	#NUM!	#NUM!	#NUM!	status=LK
tRNA-Pro(G3:U70)	YDL140C	RPO21	rpo21-1	#NUM!	#NUM!	#NUM!	#NUM!	#NUM!	#NUM!	#NUM!	status=LK
tRNA-Pro(G3:U70)	YDL207W	GLE1	gle1-4	#NUM!	#NUM!	#NUM!	#NUM!	#NUM!	#NUM!	#NUM!	status=LK
tRNA-Pro(G3:U70)	BLANK	BLANK		0	0	0	0	#NUM!	#NUM!	#NUM!
tRNA-Pro(G3:U70)	YDL213C	NOP6		#NUM!	#NUM!	#NUM!	#NUM!	#NUM!	#NUM!	#NUM!	status=LK
tRNA-Pro(G3:U70)	YDL147W	RPN5	rpn5-ph	#NUM!	#NUM!	#NUM!	#NUM!	#NUM!	#NUM!	#NUM!	status=LK
tRNA-Pro(G3:U70)	YNL182C	IPI3	ipi3-ph	#NUM!	#NUM!	#NUM!	#NUM!	#NUM!	#NUM!	#NUM!	status=LK
tRNA-Pro(G3:U70)	YNL181W	YNL181W	ynl181w-ph	#NUM!	#NUM!	#NUM!	#NUM!	#NUM!	#NUM!	#NUM!	status=LK
tRNA-Pro(G3:U70)	YDL193W	NUS1	nus1-ph	#NUM!	#NUM!	#NUM!	#NUM!	#NUM!	#NUM!	#NUM!	status=LK
tRNA-Pro(G3:U70)	YDL148C	NOP14	ydl148c-ph	#NUM!	#NUM!	#NUM!	#NUM!	#NUM!	#NUM!	#NUM!	status=LK
tRNA-Pro(G3:U70)	YNL263C	YIF1	yif1-td	#NUM!	#NUM!	#NUM!	#NUM!	#NUM!	#NUM!	#NUM!	status=LK
tRNA-Pro(G3:U70)	YNL262W	POL2	pol2-12	#NUM!	#NUM!	#NUM!	#NUM!	#NUM!	#NUM!	#NUM!	status=LK
tRNA-Pro(G3:U70)	YNL207W	RIO2	rio2-1	#NUM!	#NUM!	#NUM!	#NUM!	#NUM!	#NUM!	#NUM!	status=LK
tRNA-Pro(G3:U70)	YER012W	PRE1	pre1-1	#NUM!	#NUM!	#NUM!	#NUM!	#NUM!	#NUM!	#NUM!	status=LK
tRNA-Pro(G3:U70)	YDL165W	CDC36	cdc36-16	#NUM!	#NUM!	#NUM!	#NUM!	#NUM!	#NUM!	#NUM!	status=LK
tRNA-Pro(G3:U70)	YER008C	SEC3	sec3-2	#NUM!	#NUM!	#NUM!	#NUM!	#NUM!	#NUM!	#NUM!	status=LK
tRNA-Pro(G3:U70)	YEL055C	POL5	pol5-1	#NUM!	#NUM!	#NUM!	#NUM!	#NUM!	#NUM!	#NUM!	status=LK
tRNA-Pro(G3:U70)	YDL143W	CCT4	cct4-1	#NUM!	#NUM!	#NUM!	#NUM!	#NUM!	#NUM!	#NUM!	status=LK
tRNA-Pro(G3:U70)	YEL034W	HYP2	hyp2-1159	#NUM!	#NUM!	#NUM!	#NUM!	#NUM!	#NUM!	#NUM!	status=LK
tRNA-Pro(G3:U70)	YEL034W	HYP2	hyp2-2	#NUM!	#NUM!	#NUM!	#NUM!	#NUM!	#NUM!	#NUM!	status=LK
tRNA-Pro(G3:U70)	YDL195W	SEC31	sec31-1	#NUM!	#NUM!	#NUM!	#NUM!	#NUM!	#NUM!	#NUM!	status=LK
tRNA-Pro(G3:U70)	YDL220C	CDC13	cdc13-1	#NUM!	#NUM!	#NUM!	#NUM!	#NUM!	#NUM!	#NUM!	status=LK
tRNA-Pro(G3:U70)	YDL207W	GLE1	gle1-2	#NUM!	#NUM!	#NUM!	#NUM!	#NUM!	#NUM!	#NUM!	status=LK
tRNA-Pro(G3:U70)	YDL132W	CDC53	cdc53-1	#NUM!	#NUM!	#NUM!	#NUM!	#NUM!	#NUM!	#NUM!	status=LK
tRNA-Pro(G3:U70)	BLANK	BLANK		0	0	0	0	#NUM!	#NUM!	#NUM!
tRNA-Pro(G3:U70)	YNL163C	RIA1	ria1-ts	#NUM!	#NUM!	#NUM!	#NUM!	#NUM!	#NUM!	#NUM!	status=LK
tRNA-Pro(G3:U70)	YNL232W	CSL4	csl4-ph	#NUM!	#NUM!	#NUM!	#NUM!	#NUM!	#NUM!	#NUM!	status=LK
tRNA-Pro(G3:U70)	YDL208W	NHP2	nhp2-ph	#NUM!	#NUM!	#NUM!	#NUM!	#NUM!	#NUM!	#NUM!	status=LK
tRNA-Pro(G3:U70)	YNL189W	SRP1	srp1-ph	#NUM!	#NUM!	#NUM!	#NUM!	#NUM!	#NUM!	#NUM!	status=LK
tRNA-Pro(G3:U70)	YDL126C	CDC48	cdc48-9	#NUM!	#NUM!	#NUM!	#NUM!	#NUM!	#NUM!	#NUM!	status=LK
tRNA-Pro(G3:U70)	YDL126C	CDC48	cdc48-2	#NUM!	#NUM!	#NUM!	#NUM!	#NUM!	#NUM!	#NUM!	status=LK
tRNA-Pro(G3:U70)	YER013W	PRP22	prp22-1	#NUM!	#NUM!	#NUM!	#NUM!	#NUM!	#NUM!	#NUM!	status=LK
tRNA-Pro(G3:U70)	YNL258C	DSL1	dsl1-dc30	#NUM!	#NUM!	#NUM!	#NUM!	#NUM!	#NUM!	#NUM!	status=LK
tRNA-Pro(G3:U70)	YER018C	SPC25	spc25-1	#NUM!	#NUM!	#NUM!	#NUM!	#NUM!	#NUM!	#NUM!	status=LK
tRNA-Pro(G3:U70)	YEL019C	MMS21	mms21-1	#NUM!	#NUM!	#NUM!	#NUM!	#NUM!	#NUM!	#NUM!	status=LK
tRNA-Pro(G3:U70)	YNL216W	RAP1	rap1-1	#NUM!	#NUM!	#NUM!	#NUM!	#NUM!	#NUM!	#NUM!	status=LK
tRNA-Pro(G3:U70)	YEL055C	POL5	pol5-2	#NUM!	#NUM!	#NUM!	#NUM!	#NUM!	#NUM!	#NUM!	status=LK
tRNA-Pro(G3:U70)	YER006W	NUG1	nug1-2	#NUM!	#NUM!	#NUM!	#NUM!	#NUM!	#NUM!	#NUM!	status=LK
tRNA-Pro(G3:U70)	YEL026W	SNU13	snu13-l67w	#NUM!	#NUM!	#NUM!	#NUM!	#NUM!	#NUM!	#NUM!	status=LK
tRNA-Pro(G3:U70)	YDL126C	CDC48	cdc48-1	#NUM!	#NUM!	#NUM!	#NUM!	#NUM!	#NUM!	#NUM!	status=LK
tRNA-Pro(G3:U70)	YDL132W	CDC53	cdc53-1	#NUM!	#NUM!	#NUM!	#NUM!	#NUM!	#NUM!	#NUM!	status=LK
tRNA-Pro(G3:U70)	YER038C	KRE29	kre29-ts2	#NUM!	#NUM!	#NUM!	#NUM!	#NUM!	#NUM!	#NUM!	status=LK
tRNA-Pro(G3:U70)	BLANK	BLANK		0	0	0	0	#NUM!	#NUM!	#NUM!

## Sheet: tRNA-Ser-UCU,G26A
Raw SGA Results and Validation Data for tRNA-Ser-UCU, G26A (Arg -> Ser)
Berg et al. 2021
SGA Screen Data												Validation Data
Query Name	Array ORF	Array Name	Array annotation	Normalized colony size (EXPERIMENT)	Normalized colony std. dev. (EXPERIMENT)	Normalized colony size (CONTROL)	Normalized colony std. dev. (CONTROL)	Score	Score stdev	p-Value	Additional information	Ratio of mistranslating tRNA/WT tRNA in control strain	Ratio of mistranslating tRNA/WT tRNA in temperature sensitive strain
tRNA-Ser(UCU,G26A)	YBR198C	TAF5	taf5-3	0.64636	0.029	0.86729	0.022	-0.20923	0.029	0.00069	status=JK	0.95	0.111958
tRNA-Ser(UCU,G26A)	YBR202W	MCM7	cdc47-ts	0.31207	0.029	0.77246	0.016	-0.46253	0.028	0.00021		0.95	0.247845
tRNA-Ser(UCU,G26A)	YHR164C	DNA2	dna2-1	0.58254	0.087	0.80942	0.023	-0.22402	0.087	0.0009		0.95	0.258588
tRNA-Ser(UCU,G26A)	YNL061W	NOP2	nop2-4	0.63887	0.037	0.84264	0.052	-0.21331	0.037	6e-05		0.95	0.280527
tRNA-Ser(UCU,G26A)	YHR118C	ORC6	orc6-ph	0.6102	0.072	0.82166	0.039	-0.21164	0.072	0.00044		0.95	0.327127
tRNA-Ser(UCU,G26A)	YNR043W	MVD1	mvd1-1296	0.60782	0.014	0.83343	0.02	-0.22358	0.014	0.00018	status=JK	0.95	0.331247
tRNA-Ser(UCU,G26A)	YGR113W	DAM1	dam1-5	0.88514	0.078	1.08966	0.033	-0.2091	0.078	0.00019		0.95	0.36027
tRNA-Ser(UCU,G26A)	YDR087C	RRP1	rrp1-1	0.4326	0.053	0.67621	0.043	-0.25394	0.053	0.00049		0.95	0.458619
tRNA-Ser(UCU,G26A)	YGR092W	DBF2	dbf2-2	0.76809	0.191	1.16228	0.052	-0.40709	0.191	0.00404		0.95	0.484163
tRNA-Ser(UCU,G26A)	YBR080C	SEC18	sec18-1	0.5714	0.075	0.78039	0.052	-0.20766	0.075	0.00062		0.95	0.493671
tRNA-Ser(UCU,G26A)	YGR098C	ESP1	esp1-1	0.92883	0.039	1.18734	0.004	-0.25813	0.039	2e-05		0.95	0.502166
tRNA-Ser(UCU,G26A)	YGL048C	RPT6	rpt6-1	0.35694	0.081	0.77872	0.03	-0.43114	0.081	0.00303		0.95	0.523142
tRNA-Ser(UCU,G26A)	YML023C	NSE5	nse5-ts1	0.35798	0.022	0.7519	0.012	-0.39131	0.022	0.00124	status=JK	0.95	0.601397
tRNA-Ser(UCU,G26A)	YMR043W	MCM1	mcm1-ph	0.29396	0.116	0.84935	0.132	-0.55789	0.116	0.01474		0.95	0.603933
tRNA-Ser(UCU,G26A)	YGL055W	OLE1	ole1-m2	0.36275	0.102	0.60375	0.166	-0.27496	0.102	0.00565		0.95	0.609883
tRNA-Ser(UCU,G26A)	YFR028C	CDC14	cdc14-2	0.46866	0.068	0.84521	0.036	-0.37014	0.068	0.00083		0.95	0.611377
tRNA-Ser(UCU,G26A)	YFR028C	CDC14	cdc14-8	0.86564	0.027	1.18498	0.016	-0.31813	0.027	0.00032	status=JK	0.95	0.613998
tRNA-Ser(UCU,G26A)	YDR473C	PRP3	prp3-1	0.77127	0.048	1.02163	0.029	-0.25169	0.048	7e-05		0.95	0.618043
tRNA-Ser(UCU,G26A)	YGR006W	PRP18	prp18-ts	0.57787	0.222	0.80867	0.056	-0.21869	0.222	0.01378		0.95	0.641067
tRNA-Ser(UCU,G26A)	YFR005C	SAD1	sad1-1	0.42698	0.2	0.70068	0.045	-0.28737	0.2	0.02353		0.95	0.653162
tRNA-Ser(UCU,G26A)	YHR069C	RRP4	rrp4-1	0.60121	0.23	0.82075	0.1	-0.21038	0.23	0.01367		0.95	0.693455
tRNA-Ser(UCU,G26A)	YNL061W	NOP2	nop2-9	0.30925	0.012	0.60559	0.021	-0.29446	0.012	0.0005	status=JK	0.95	0.695374
tRNA-Ser(UCU,G26A)	YPR162C	ORC4	ypr162c-ph	0.53006	0.239	0.8069	0.066	-0.26558	0.239	0.0213		0.95	0.696398
tRNA-Ser(UCU,G26A)	YLL050C	COF1	cof1-8	0.70562	0.048	1.02329	0.032	-0.31757	0.048	9e-05		0.95	0.703397
tRNA-Ser(UCU,G26A)	YJR093C	FIP1	fip1-433	0.72889	0.211	0.93536	0.238	-0.28005	0.211	0.0062		0.95	0.71137
tRNA-Ser(UCU,G26A)	YMR235C	RNA1	rna1-1	0.28725	0.099	0.48093	0.059	-0.20921	0.099	0.01031		0.95	0.718331
tRNA-Ser(UCU,G26A)	YOR362C	PRE10	yor362c-ph	0.21453	0.012	0.45585	0.111	-0.21224	0.012	0.00109	status=JK	0.95	0.728869
tRNA-Ser(UCU,G26A)	YBR198C	TAF5	taf5-20	0.09032	0.032	0.6985	0.033	-0.61369	0.032	0.01054		0.95	0.74561
tRNA-Ser(UCU,G26A)	YJR065C	ARP3	arp3-d11a	0.52189	0.065	0.70245	0.126	-0.22087	0.065	0.00052		0.95	0.755871
tRNA-Ser(UCU,G26A)	YPR086W	SUA7	sua7-c149r	0.34921	0.005	0.57995	0.058	-0.23442	0.005	6e-05	status=JK	0.95	0.775578
tRNA-Ser(UCU,G26A)	YLR430W	SEN1	sen1-1	0.57568	0.142	0.78185	0.138	-0.2169	0.142	0.00395		0.95	0.78735
tRNA-Ser(UCU,G26A)	YGR245C	SDA1	sda1-2	0.54866	0.038	0.82117	0.014	-0.27149	0.038	9e-05		0.95	0.807484
tRNA-Ser(UCU,G26A)	YLR274W	MCM5	cdc46-1	0.69209	0.123	1.03116	0.022	-0.33316	0.123	0.0015		0.95	0.810161
tRNA-Ser(UCU,G26A)	YNL061W	NOP2	nop2-3	0.58737	0.11	0.88948	0.051	-0.30147	0.11	0.00176		0.95	0.81958
tRNA-Ser(UCU,G26A)	YLR196W	PWP1	pwp1-ph	0.56993	0.078	0.82364	0.027	-0.25189	0.078	0.00069		0.95	0.823129
tRNA-Ser(UCU,G26A)	YIR012W	SQT1	sqt1-201	0.75194	0.106	0.99858	0.076	-0.27277	0.106	0.00075		0.95	0.824261
tRNA-Ser(UCU,G26A)	YGL097W	SRM1	srm1-ts	0.58962	0.043	0.75152	0.083	-0.20055	0.043	0.00174	status=JK	0.95	0.839042
tRNA-Ser(UCU,G26A)	YDR236C	FMN1	ydr236c-ph	0.59245	0.188	0.87356	0.011	-0.27688	0.188	0.00807		0.95	0.849813
tRNA-Ser(UCU,G26A)	YMR240C	CUS1	cus1-3	0.9368	0.141	1.15718	0.089	-0.22489	0.141	0.00092		0.95	0.851625
tRNA-Ser(UCU,G26A)	YDL102W	POL3	cdc2-7	0.28643	0.004	0.53456	0.078	-0.25408	0.004	0		0.95	0.856099
tRNA-Ser(UCU,G26A)	YDR182W	CDC1	cdc1-2	0.78693	0.036	1.0869	0.006	-0.30351	0.036	3e-05		0.95	0.862064
tRNA-Ser(UCU,G26A)	YLL011W	SOF1	sof1-ph	0.82634	0.206	1.04544	0.044	-0.2151	0.206	0.00406		0.95	0.863042
tRNA-Ser(UCU,G26A)	YJR076C	CDC11	cdc11-4	0.70162	0.029	1.06186	0.023	-0.36392	0.029	0.00058	status=JK	0.95	0.863229
tRNA-Ser(UCU,G26A)	YPR178W	PRP4	prp4-1	0.78403	0.008	1.0667	0.048	-0.27457	0.008	4e-05	status=JK	0.95	0.872893
tRNA-Ser(UCU,G26A)	YGL137W	SEC27	sec27-1	0.76077	0.024	1.05741	0.018	-0.29674	0.024	1e-05		0.95	0.877599
tRNA-Ser(UCU,G26A)	YER093C	TSC11	tsc11-1	0.57311	0.064	0.77081	0.054	-0.2068	0.064	0.00038		0.95	0.885564
tRNA-Ser(UCU,G26A)	YGR218W	CRM1	crm1-1	0.60394	0.053	0.93155	0.008	-0.33171	0.053	0.00254	status=JK	0.95	0.891247
tRNA-Ser(UCU,G26A)	YGR113W	DAM1	dam1-11	0.85982	0.023	1.14384	0.016	-0.29608	0.023	1e-05		0.95	0.89602
tRNA-Ser(UCU,G26A)	YBR060C	ORC2	orc2-3	0.87559	0.086	1.12324	0.065	-0.23731	0.086	0.00026		0.95	0.903583
tRNA-Ser(UCU,G26A)	YKL145W	RPT1	rpt1-1	0.29247	0.015	0.72515	0.022	-0.42466	0.015	0.00083	status=JK	0.95	0.912489
tRNA-Ser(UCU,G26A)	YHR166C	CDC23	cdc23-1	0.52938	0.233	1.07136	0.118	-0.54034	0.233	0.02003		0.95	0.918525
tRNA-Ser(UCU,G26A)	YDL097C	RPN6	rpn6-ph	0.65184	0.064	0.87541	0.03	-0.22584	0.064	0.00026		0.95	0.918628
tRNA-Ser(UCU,G26A)	YDR311W	TFB1	tfb1-1	0.35178	0.038	0.65677	0.217	-0.28642	0.038	0.00035		0.95	0.931595
tRNA-Ser(UCU,G26A)	YLR222C	UTP13	ylr222c-ph	0.5511	0.07	0.76598	0.031	-0.21648	0.07	0.00056		0.95	0.934259
tRNA-Ser(UCU,G26A)	YOR020C	HSP10	hsp10-ts	0.50047	0.028	0.74716	0.01	-0.24421	0.028	5e-05		0.95	0.944604
tRNA-Ser(UCU,G26A)	YDR062W	LCB2	lcb2-19	0.38843	0.118	0.59674	0.124	-0.22007	0.118	0.00715		0.95	0.948769
tRNA-Ser(UCU,G26A)	YKL022C	CDC16	cdc16-1	0.66165	0.175	1.08365	0.027	-0.4231	0.175	0.00478		0.95	0.956806
tRNA-Ser(UCU,G26A)	YNL061W	NOP2	nop2-5	0.69085	0.2	0.90902	0.048	-0.22467	0.2	0.0062		0.95	0.957605
tRNA-Ser(UCU,G26A)	YLR186W	EMG1	emg1-1	0.60933	0.101	1.00085	0.08	-0.37397	0.101	0.00124		0.95	0.958953
tRNA-Ser(UCU,G26A)	YMR061W	RNA14	rna14-ph	0.67227	0.121	0.87844	0.07	-0.22025	0.121	0.00156		0.95	0.978933
tRNA-Ser(UCU,G26A)	YKL104C	GFA1	gfa1-97	0.66671	0.216	0.82452	0.209	-0.21783	0.216	0.00856		0.95	0.989596
tRNA-Ser(UCU,G26A)	YBR142W	MAK5	mak5-ph	0.26987	0.017	0.6947	0.007	-0.42367	0.017	0.00126	status=JK	0.95	0.992125
tRNA-Ser(UCU,G26A)	YIL144W	TID3	tid3-1	0.88641	0.091	1.10764	0.03	-0.22436	0.091	0.00029		0.95	0.999377
tRNA-Ser(UCU,G26A)	YAL038W	CDC19	cdc19-1	0.86519	0.025	1.09179	0.006	-0.22701	0.025	0.00029	status=JK	0.95	1.00384
tRNA-Ser(UCU,G26A)	YDL008W	APC11	apc11-13	0.39671	0.027	0.61029	0.019	-0.21961	0.027	0.00159	status=JK	0.95	1.00404
tRNA-Ser(UCU,G26A)	YGL145W	TIP20	tip20-5	0.86216	0.007	1.0766	0.004	-0.21866	0.007	0		0.95	1.0056
tRNA-Ser(UCU,G26A)	YOR048C	RAT1	rat1-1	0.59989	0.058	0.9004	0.049	-0.28613	0.058	0.00024		0.95	1.02475
tRNA-Ser(UCU,G26A)	YJR076C	CDC11	cdc11-1	0.99972	0.094	1.22705	0.036	-0.22963	0.094	0.00022		0.95	1.04809
tRNA-Ser(UCU,G26A)	YJL002C	OST1	ost1-6	0.82226	0.47	1.06283	0.162	-0.20192	0.47	0.03958		0.95	1.05967
tRNA-Ser(UCU,G26A)	YDR052C	DBF4	dbf4-2	0.72096	0.003	0.94929	0.014	-0.23684	0.003	1e-05	status=JK	0.95	1.06468
tRNA-Ser(UCU,G26A)	YFL045C	SEC53	sec53-6	0.43872	0.062	0.83488	0.033	-0.40323	0.062	0.00077		0.95	1.08312
tRNA-Ser(UCU,G26A)	YDR208W	MSS4	mss4-102	0.20789	0.016	0.56189	0.104	-0.35125	0.016	0.00191	status=JK	0.95	1.09147
tRNA-Ser(UCU,G26A)	YJR017C	ESS1	ess1-h164r	0.72269	0.118	0.93401	0.02	-0.22114	0.118	0.00117		0.95	1.10511
tRNA-Ser(UCU,G26A)	YPL124W	SPC29	spc29-20	0.27046	0.095	0.5134	0.112	-0.24395	0.095	0.01066		0.95	1.15374
tRNA-Ser(UCU,G26A)	YDR060W	MAK21	mak21-3	0.48107	0.029	0.90893	0.081	-0.4345	0.029	0.00125	status=JK	0.95	1.15853
tRNA-Ser(UCU,G26A)	YGL130W	CEG1	ceg1-3	0.36804	0.041	0.74187	0.008	-0.3795	0.041	0.00419	status=JK	0.95	1.16882
tRNA-Ser(UCU,G26A)	YPL209C	IPL1	ipl1-1	0.43297	0.068	0.6739	0.055	-0.23376	0.068	0.00105		0.95	1.17558
tRNA-Ser(UCU,G26A)	YOR174W	MED4	med4-6	0.18249	0.009	0.44596	0.015	-0.26121	0.009	0.00084	status=JK	0.95	1.21842
tRNA-Ser(UCU,G26A)	YJR057W	CDC8	cdc8-1	0.29522	0.225	0.78128	0.031	-0.50066	0.225	0.07845
tRNA-Ser(UCU,G26A)	YBR160W	CDC28	cdc28-4	0.8104	0.691	1.03256	0.091	-0.20366	0.691	0.10077
tRNA-Ser(UCU,G26A)	YLR045C	STU2	stu2-10	0.02694	0.024	0.44328	0.221	-0.41961	0.024	0.1138
tRNA-Ser(UCU,G26A)	YJL125C	GCD14	gcd14-4	0.12722	0.127	0.3814	0.228	-0.20455	0.127	0.13955
tRNA-Ser(UCU,G26A)	YLL003W	SFI1	sfi1-7	0.30109	0.33	0.6623	0.32	-0.46388	0.33	0.16529
tRNA-Ser(UCU,G26A)	YDR021W	FAL1	fal1-1	0	0	0.66982	0.047	-0.66977	0	#NUM!
tRNA-Ser(UCU,G26A)	YOL123W	HRP1	hrp1-7	0	0	0.41936	0.488	-0.38074	0	#NUM!
tRNA-Ser(UCU,G26A)	YLR418C	CDC73		0	0	0.36294	0.439	-0.28393	0	#NUM!	status=JK
tRNA-Ser(UCU,G26A)	YNL102W	POL1	pol1-2	0.19854	0.168	0.39645	0.326	-0.19985	0.168	0.09885
tRNA-Ser(UCU,G26A)	YBR198C	TAF5	taf5-15	0.67253	0.06	0.85951	0.029	-0.19646	0.06	0.00019
tRNA-Ser(UCU,G26A)	YBR160W	CDC28	cdc28-td	0.11975	0.097	0.28095	0.082	-0.19311	0.097	0.09072
tRNA-Ser(UCU,G26A)	YFR028C	CDC14	cdc14-1	0.83127	0.085	1.02092	0.022	-0.19212	0.085	0.00029
tRNA-Ser(UCU,G26A)	YDL105W	NSE4	nse4-ts3	0.6892	0.015	0.87311	0.018	-0.18981	0.015	0.00016	status=JK
tRNA-Ser(UCU,G26A)	YPL093W	NOG1	nog1-1	0.61165	0.064	0.79002	0.073	-0.18916	0.064	0.00362	status=JK
tRNA-Ser(UCU,G26A)	YDR004W	RAD57		0.6525	0.075	0.84058	0.06	-0.18683	0.075	0.00041
tRNA-Ser(UCU,G26A)	YBL074C	AAR2	aar2-ph	0.64351	0.101	0.82024	0.017	-0.18349	0.101	0.00104
tRNA-Ser(UCU,G26A)	YJR006W	POL31	hys2-ts	0.5695	0.061	0.75488	0.006	-0.18299	0.061	0.00033
tRNA-Ser(UCU,G26A)	YML069W	POB3	pob3-7	0.59739	0.146	0.77438	0.075	-0.18185	0.146	0.0038
tRNA-Ser(UCU,G26A)	YIL106W	MOB1	yil106w-ph	0.38629	0.008	0.56309	0.036	-0.17916	0.008	0.00014	status=JK
tRNA-Ser(UCU,G26A)	YML049C	RSE1	rse1-1	0.73167	0.01	0.90816	0.037	-0.17883	0.01	6e-05	status=JK
tRNA-Ser(UCU,G26A)	YBR121C	GRS1	grs1-ph	0.84378	0.095	1.0189	0.016	-0.17788	0.095	0.00039
tRNA-Ser(UCU,G26A)	YDR288W	NSE3	nse3-ts4	0.89967	0.026	1.07859	0.06	-0.1777	0.026	1e-05
tRNA-Ser(UCU,G26A)	YOR244W	ESA1	esa1-l254p	0.55764	0.079	0.73235	0.04	-0.17707	0.079	0.00077
tRNA-Ser(UCU,G26A)	YDL102W	POL3	cdc2-1	0.67025	0.027	0.85519	0.015	-0.17694	0.027	0.00054	status=JK
tRNA-Ser(UCU,G26A)	YNR053C	NOG2	nog2-1	0.46695	0.072	0.64768	0.016	-0.17625	0.072	0.00098
tRNA-Ser(UCU,G26A)	YOL077C	BRX1	brx1-ph	0.76664	0.014	0.94968	0.039	-0.17587	0.014	0.00011	status=JK
tRNA-Ser(UCU,G26A)	YOL139C	CDC33	cdc33-e72g	0.65475	0.013	0.82801	0.028	-0.17508	0.013	0.00013	status=JK
tRNA-Ser(UCU,G26A)	YHR052W	CIC1	cic1-2	0.46226	0.235	0.63689	0.076	-0.17457	0.235	0.02919
tRNA-Ser(UCU,G26A)	YFL039C	ACT1	act1-112	0.69839	0.019	0.87637	0.024	-0.17329	0.019	0.00024	status=JK
tRNA-Ser(UCU,G26A)	YPL211W	NIP7	nip7-1	0.45542	0.116	0.62818	0.005	-0.17257	0.116	0.00433
tRNA-Ser(UCU,G26A)	YDL003W	MCD1	mcd1-73	0.81216	0.03	0.97636	0.041	-0.1724	0.03	1e-05
tRNA-Ser(UCU,G26A)	YLR459W	GAB1	gab1-2	0.76406	0.35	0.90252	0.115	-0.17184	0.35	0.02227
tRNA-Ser(UCU,G26A)	YDR182W	CDC1	cdc1-4	0.19521	0.085	0.38476	0.092	-0.17129	0.085	0.01959
tRNA-Ser(UCU,G26A)	YLR215C	CDC123	cdc123-4	0.68228	0.039	0.84918	0.018	-0.17094	0.039	5e-05
tRNA-Ser(UCU,G26A)	YGR116W	SPT6	spt6-14	0.62899	0.125	0.77974	0.126	-0.17048	0.125	0.00208
tRNA-Ser(UCU,G26A)	YMR168C	CEP3	cep3-2	0.76916	0.038	0.91633	0.073	-0.17036	0.038	0.00081	status=JK
tRNA-Ser(UCU,G26A)	YOR259C	RPT4	rpt4-150	0.9576	0.033	1.13152	0.04	-0.16988	0.033	1e-05
tRNA-Ser(UCU,G26A)	YDR416W	SYF1	ydr416w-ph	0.84903	0.027	1.01054	0.025	-0.16838	0.027	1e-05
tRNA-Ser(UCU,G26A)	YJR065C	ARP3	arp3-f306g	0.97402	0.243	1.11435	0.232	-0.16781	0.243	0.00404
tRNA-Ser(UCU,G26A)	YNR011C	PRP2	prp2-1	0.74782	0.218	0.9254	0.044	-0.16763	0.218	0.00634
tRNA-Ser(UCU,G26A)	YAL025C	MAK16	mak16-ph	0.64332	0.011	0.80945	0.044	-0.16644	0.011	9e-05	status=JK
tRNA-Ser(UCU,G26A)	YGR113W	DAM1	dam1-9	0.83065	0.048	0.99453	0.068	-0.16494	0.048	5e-05
tRNA-Ser(UCU,G26A)	YKL042W	SPC42	spc42-11	1.00232	0.023	1.16315	0.017	-0.16486	0.023	0
tRNA-Ser(UCU,G26A)	YLR186W	EMG1	emg1-1	0.76775	0.026	0.92973	0.035	-0.16457	0.026	1e-05
tRNA-Ser(UCU,G26A)	YDR235W	PRP42	prp42-ph	0.27248	0.15	0.50452	0.21	-0.16405	0.15	0.03604
tRNA-Ser(UCU,G26A)	YGL048C	RPT6	rpt6-25	0.31758	0.117	0.47353	0.015	-0.16331	0.117	0.01216
tRNA-Ser(UCU,G26A)	YDR398W	UTP5	ydr398w-ph	0.57101	0.206	0.74564	0.112	-0.16249	0.206	0.01156
tRNA-Ser(UCU,G26A)	YGL151W	NUT1		0.64868	0.032	0.81106	0.009	-0.16247	0.032	3e-05
tRNA-Ser(UCU,G26A)	YJR076C	CDC11	cdc11-2	0.70013	0.055	0.86964	0.037	-0.16076	0.055	0.00013
tRNA-Ser(UCU,G26A)	YPL169C	MEX67	mex67-ts5	0.80996	0.005	0.97112	0.003	-0.1605	0.005	1e-05	status=JK
tRNA-Ser(UCU,G26A)	YBR060C	ORC2	orc2-2	1.01271	0.061	1.17276	0.029	-0.15886	0.061	6e-05
tRNA-Ser(UCU,G26A)	YBR247C	ENP1	enp1-1	0.93424	0.074	1.08439	0.009	-0.15848	0.074	0.00014
tRNA-Ser(UCU,G26A)	YMR236W	TAF9	taf9-ts2	0.89246	0.024	1.06428	0.068	-0.15642	0.024	1e-05
tRNA-Ser(UCU,G26A)	YLR117C	CLF1	clf1-1	0.75274	0.069	0.91033	0.046	-0.15618	0.069	0.00276	status=JK
tRNA-Ser(UCU,G26A)	YAL041W	CDC24	cdc24-5	0.91283	0.136	1.05486	0.058	-0.15469	0.136	0.00089
tRNA-Ser(UCU,G26A)	YFR004W	RPN11	rpn11-8	0.6378	0.177	0.79258	0.026	-0.15127	0.177	0.00549
tRNA-Ser(UCU,G26A)	YPL217C	BMS1	bms1-1	0.28714	0.014	0.44902	0.081	-0.15095	0.014	0.00076	status=JK
tRNA-Ser(UCU,G26A)	YOR341W	RPA190	rpa190-g728d	0.71214	0.08	0.86265	0.008	-0.14929	0.08	0.00038
tRNA-Ser(UCU,G26A)	YKL172W	EBP2	ebp2-1	0.74957	0.015	0.89175	0.02	-0.14775	0.015	0.00014	status=JK
tRNA-Ser(UCU,G26A)	YOR204W	DED1	ded1-95	0.87473	0.032	1.01114	0.052	-0.1473	0.032	1e-05
tRNA-Ser(UCU,G26A)	YJL050W	MTR4	mtr4-1	0.9229	0.006	1.07181	0.002	-0.14701	0.006	1e-05	status=JK
tRNA-Ser(UCU,G26A)	YER147C	SCC4	scc4-4	0.91934	0.032	1.05691	0.085	-0.14579	0.032	1e-05
tRNA-Ser(UCU,G26A)	YDR325W	YCG1	ycg1-2	0.87701	0.024	1.01745	0.012	-0.14566	0.024	0.00025	status=JK
tRNA-Ser(UCU,G26A)	YLR045C	STU2	stu2-11	0.88403	0.03	1.02517	0.019	-0.14562	0.03	1e-05
tRNA-Ser(UCU,G26A)	YGR253C	PUP2	pup2-ph	0.85022	0.044	0.98942	0.015	-0.14531	0.044	4e-05
tRNA-Ser(UCU,G26A)	YJR065C	ARP3	arp3-g15c	0.21973	0.114	0.40405	0.111	-0.1453	0.114	0.0306
tRNA-Ser(UCU,G26A)	YFR050C	PRE4	pre4-ph	0.73962	0.02	0.88242	0.019	-0.14497	0.02	1e-05
tRNA-Ser(UCU,G26A)	YLR212C	TUB4	tub4-d	0.74057	0.042	0.88224	0.014	-0.14473	0.042	5e-05
tRNA-Ser(UCU,G26A)	YOR181W	LAS17	las17-14	0.89827	0.035	1.03545	0.015	-0.14429	0.035	2e-05
tRNA-Ser(UCU,G26A)	YPL124W	SPC29	spc29-3	0.54509	0.222	0.70026	0.18	-0.14358	0.222	0.01618
tRNA-Ser(UCU,G26A)	YDR016C	DAD1	dad1-ph	0.8318	0.021	0.97506	0.02	-0.14248	0.021	0
tRNA-Ser(UCU,G26A)	YDL103C	QRI1	qri1-ts1	0.97219	0.011	1.10115	0.05	-0.14101	0.011	4e-05	status=JK
tRNA-Ser(UCU,G26A)	YGR006W	PRP18	prp18-1202	0.34066	0.023	0.47385	0.102	-0.14084	0.023	9e-05
tRNA-Ser(UCU,G26A)	YDR356W	SPC110	spc110-221	0.90842	0.034	1.04474	0.016	-0.14042	0.034	1e-05
tRNA-Ser(UCU,G26A)	YHR191C	CTF8	ctf8-9	0.62109	0.036	0.75543	0.113	-0.14007	0.036	0.00115	status=JK
tRNA-Ser(UCU,G26A)	YIR022W	SEC11	sec11-2	0.83787	0.039	0.97926	0.011	-0.13963	0.039	3e-05
tRNA-Ser(UCU,G26A)	YDL102W	POL3	cdc2-2	0.88599	0.026	1.0201	0.004	-0.13923	0.026	1e-05
tRNA-Ser(UCU,G26A)	YLR430W	SEN1	sen1-1	0.67215	0.163	0.80794	0.042	-0.13881	0.163	0.00375
tRNA-Ser(UCU,G26A)	YLR008C	PAM18	pam18-1	0.73749	0.022	0.86878	0.016	-0.1378	0.022	0.0003	status=JK
tRNA-Ser(UCU,G26A)	YGR103W	NOP7	nop7-1	0.86176	0.008	0.99954	0.012	-0.13769	0.008	3e-05	status=JK
tRNA-Ser(UCU,G26A)	YFR037C	RSC8	rsc8-ts21	0.79636	0.159	0.92736	0.031	-0.13747	0.159	0.00211
tRNA-Ser(UCU,G26A)	YPL209C	IPL1	ipl1-2	0.87694	0.02	1.01218	0.042	-0.13654	0.02	0
tRNA-Ser(UCU,G26A)	YDL003W	MCD1	ydl003w-ph	0.72621	0.012	0.86124	0.025	-0.1352	0.012	9e-05	status=JK
tRNA-Ser(UCU,G26A)	YGR140W	CBF2	cbf2-1	0.93789	0.02	1.07495	0.024	-0.13461	0.02	0
tRNA-Ser(UCU,G26A)	YML032C	RAD52		0.78699	0.049	0.91885	0.031	-0.13299	0.049	7e-05
tRNA-Ser(UCU,G26A)	YNL102W	POL1	pol1-13	0.90626	0.054	1.03865	0.016	-0.13298	0.054	6e-05
tRNA-Ser(UCU,G26A)	YKL042W	SPC42	spc42-10	0.8925	0.003	1.01755	0.039	-0.13068	0.003	0	status=JK
tRNA-Ser(UCU,G26A)	YJL194W	CDC6	cdc6-1	0.67609	0.138	0.80506	0.006	-0.12933	0.138	0.00225
tRNA-Ser(UCU,G26A)	YDR341C	YDR341C	ydr341c-ph	1.03507	0.16	1.18723	0.069	-0.12933	0.16	0.00099
tRNA-Ser(UCU,G26A)	YER136W	GDI1	gdi1-1	0.43186	0.147	0.54141	0.098	-0.12918	0.147	0.00981
tRNA-Ser(UCU,G26A)	YFL039C	ACT1	act1-4	0.87628	0.057	1.01827	0.078	-0.12904	0.057	0.0014	status=JK
tRNA-Ser(UCU,G26A)	YPR178W	PRP4	prp4-ts	0.85844	0.013	0.99447	0.035	-0.12879	0.013	8e-05	status=JK
tRNA-Ser(UCU,G26A)	YIR011C	STS1	sts1-ph	0.66505	0.013	0.75048	0.201	-0.12859	0.013	0.00013	status=JK
tRNA-Ser(UCU,G26A)	YOL038W	PRE6	pre6-ph	0.9192	0.058	1.04175	0.012	-0.12789	0.058	7e-05
tRNA-Ser(UCU,G26A)	YCR002C	CDC10	cdc10-5	0.17889	0.071	0.31072	0.077	-0.12716	0.071	0.01516
tRNA-Ser(UCU,G26A)	YML126C	ERG13	erg13-ph	0.69325	0.037	0.81037	0.035	-0.12678	0.037	4e-05
tRNA-Ser(UCU,G26A)	YOL135C	MED7	med7-163	0.86628	0.102	0.98637	0.021	-0.12675	0.102	0.00044
tRNA-Ser(UCU,G26A)	YJR076C	CDC11	cdc11-5	0.55835	0.137	0.76553	0.282	-0.12657	0.137	0.00386
tRNA-Ser(UCU,G26A)	YNR038W	DBP6	dbp6-ph	0.9113	0.015	1.03798	0.024	-0.12553	0.015	8e-05	status=JK
tRNA-Ser(UCU,G26A)	YMR213W	CEF1	cef1-13	1.00217	0.025	1.12531	0.011	-0.12502	0.025	0
tRNA-Ser(UCU,G26A)	YLR002C	NOC3	noc3-ph	0.35351	0.263	0.48096	0.172	-0.12429	0.263	0.07461
tRNA-Ser(UCU,G26A)	YNL102W	POL1	pol1-17	0.30378	0.053	0.43455	0.209	-0.12305	0.053	0.00993	status=JK
tRNA-Ser(UCU,G26A)	YLR321C	SFH1	sfh1-1	0.31292	0.01	0.43686	0.035	-0.12248	0.01	0.00037	status=JK
tRNA-Ser(UCU,G26A)	YDR208W	MSS4	mss4-103	0.92337	0.039	1.04625	0.008	-0.1223	0.039	2e-05
tRNA-Ser(UCU,G26A)	YPL228W	CET1	cet1-2	0.91243	0.02	1.03111	0.018	-0.12228	0.02	0
tRNA-Ser(UCU,G26A)	YLR298C	YHC1	yhc1-8	0.95073	0.035	1.07348	0.042	-0.12179	0.035	1e-05
tRNA-Ser(UCU,G26A)	YDL108W	KIN28	kin28-ts	0.69687	0.202	0.80205	0.181	-0.12116	0.202	0.00625
tRNA-Ser(UCU,G26A)	YER093C	TSC11	tsc11-7	0.85465	0.171	0.97797	0.104	-0.12038	0.171	0.00213
tRNA-Ser(UCU,G26A)	YGR092W	DBF2		0.69792	0.158	0.82295	0.163	-0.11972	0.158	0.00307
tRNA-Ser(UCU,G26A)	YNL132W	KRE33	ynl132w-ph	0.80978	0.048	0.91757	0.04	-0.11969	0.048	6e-05
tRNA-Ser(UCU,G26A)	YPL266W	DIM1	dim1-2	0.79481	0.014	0.91514	0.032	-0.11905	0.014	0
tRNA-Ser(UCU,G26A)	YIL150C	MCM10	mcm10-1	0.81569	0.059	0.9223	0.036	-0.11845	0.059	0.0001
tRNA-Ser(UCU,G26A)	YAR019C	CDC15	cdc15-2	0.74117	0.005	0.82974	0.141	-0.11687	0.005	2e-05	status=JK
tRNA-Ser(UCU,G26A)	YLL035W	GRC3	grc3-ph	0.74983	0.039	0.87538	0.058	-0.11664	0.039	0.00091	status=JK
tRNA-Ser(UCU,G26A)	YOL123W	HRP1	hrp1-1	0.48716	0.052	0.60208	0.045	-0.11664	0.052	0.00033
tRNA-Ser(UCU,G26A)	YFL009W	CDC4	cdc4-3	1.00291	0.067	1.11755	0.006	-0.11651	0.067	8e-05
tRNA-Ser(UCU,G26A)	YER094C	PUP3	pup3-ph	0.79705	0.023	0.89794	0.034	-0.11608	0.023	0.00027	status=JK
tRNA-Ser(UCU,G26A)	YJL074C	SMC3	smc3-42	0.9996	0.013	1.10977	0.028	-0.11549	0.013	6e-05	status=JK
tRNA-Ser(UCU,G26A)	YOR174W	MED4	med4-54	0.58902	0.023	0.69227	0.047	-0.11447	0.023	2e-05
tRNA-Ser(UCU,G26A)	YMR290C	HAS1	has1-ph	0.78447	0.159	0.93098	0.063	-0.11374	0.159	0.00223
tRNA-Ser(UCU,G26A)	YIL150C	MCM10	mcm10-43	0.71938	0.017	0.82379	0.022	-0.11307	0.017	0.00018	status=JK
tRNA-Ser(UCU,G26A)	YDR145W	TAF12	taf12-l446a	0.76658	0.131	0.87922	0.025	-0.11161	0.131	0.00135
tRNA-Ser(UCU,G26A)	YHR085W	IPI1	ipi1-ph	0.74022	0.018	0.84922	0.006	-0.11143	0.018	0
tRNA-Ser(UCU,G26A)	YDR052C	DBF4	dbf4-ts	0.91159	0.059	1.02404	0.02	-0.11105	0.059	8e-05
tRNA-Ser(UCU,G26A)	YLR186W	EMG1	emg1-ph	0.76651	0.021	0.87662	0.013	-0.11093	0.021	1e-05
tRNA-Ser(UCU,G26A)	YML065W	ORC1	orc1-ph	0.75554	0.039	0.85809	0.01	-0.11023	0.039	4e-05
tRNA-Ser(UCU,G26A)	YDR245W	MNN10		0.42409	0.028	0.52803	0.038	-0.10986	0.028	8e-05
tRNA-Ser(UCU,G26A)	YOL135C	MED7	med7-141	0.66141	0.022	0.76012	0.039	-0.10948	0.022	0.00036	status=JK
tRNA-Ser(UCU,G26A)	YPL233W	NSL1	nsl1-5	0.76987	0.03	0.87758	0.025	-0.10932	0.03	2e-05
tRNA-Ser(UCU,G26A)	YER147C	SCC4	yer147c-ph	0.96368	0.153	1.07622	0.017	-0.10878	0.153	0.00108
tRNA-Ser(UCU,G26A)	YJR045C	SSC1	ssc1-2	0.73299	0.004	0.84565	0.017	-0.10862	0.004	1e-05	status=JK
tRNA-Ser(UCU,G26A)	YBL050W	SEC17	sec17-1	0.89966	0.043	1.00535	0.008	-0.10795	0.043	3e-05
tRNA-Ser(UCU,G26A)	YPR181C	SEC23	sec23-1	0.20333	0.145	0.29449	0.063	-0.10784	0.145	0.0673
tRNA-Ser(UCU,G26A)	YPL190C	NAB3	nab3-11	0	0	0.10813	0.02	-0.10735	0	#NUM!
tRNA-Ser(UCU,G26A)	YBR193C	MED8	med8-51	0.63704	0.018	0.74086	0.009	-0.10718	0.018	0.00028	status=JK
tRNA-Ser(UCU,G26A)	YGR047C	TFC4	ygr047c-ph	0.84318	0.112	0.94204	0.094	-0.10716	0.112	0.00064
tRNA-Ser(UCU,G26A)	YFL008W	SMC1	smc1-2	0.78086	0.038	0.88417	0.069	-0.10669	0.038	3e-05
tRNA-Ser(UCU,G26A)	YLR298C	YHC1	yhc1-3	0.29147	0.05	0.40296	0.031	-0.10651	0.05	0.00139
tRNA-Ser(UCU,G26A)	YPL175W	SPT14	spt14-1-10c	0.25365	0.031	0.3842	0.113	-0.10577	0.031	0.00506	status=JK
tRNA-Ser(UCU,G26A)	YIR008C	PRI1	pri1-m4	0.68347	0.052	0.78648	0.014	-0.10577	0.052	0.00012
tRNA-Ser(UCU,G26A)	YPL007C	TFC8	tfc8-ph	1.13449	0.074	1.23996	0.041	-0.10557	0.073	7e-05
tRNA-Ser(UCU,G26A)	YFL039C	ACT1	act1-108	0.90453	0.057	1.01562	0.075	-0.10554	0.057	7e-05
tRNA-Ser(UCU,G26A)	YPR094W	RDS3	rds3-1	1.07968	0.009	1.18599	0.032	-0.1044	0.009	3e-05	status=JK
tRNA-Ser(UCU,G26A)	YLR440C	SEC39	sec39-ph	0.56253	0.085	0.6574	0.037	-0.10407	0.085	0.00094
tRNA-Ser(UCU,G26A)	YDL105W	NSE4	nse4-ts4	0.78674	0.003	0.89236	0.024	-0.10345	0.003	1e-05	status=JK
tRNA-Ser(UCU,G26A)	YGL097W	SRM1	srm1-g282s	0.13229	0.034	0.22964	0.029	-0.10294	0.034	0.02081	status=JK
tRNA-Ser(UCU,G26A)	YDR088C	SLU7	slu7-ts1	0.8883	0.05	0.98384	0.048	-0.10133	0.05	5e-05
tRNA-Ser(UCU,G26A)	YML114C	TAF8	taf8-7	0.93956	0.022	1.03134	0.031	-0.10117	0.022	0
tRNA-Ser(UCU,G26A)	YML023C	NSE5	nse5-ts4	0.84225	0.012	0.94069	0.043	-0.10059	0.012	7e-05	status=JK
tRNA-Ser(UCU,G26A)	YNL002C	RLP7	rlp7-ph	1.03905	0.064	1.139	0.025	-0.10043	0.064	6e-05
tRNA-Ser(UCU,G26A)	YDR064W	RPS13	rps13-ph	0.96756	0.077	1.06083	0.014	-0.1003	0.077	0.00014
tRNA-Ser(UCU,G26A)	YFR028C	CDC14	cdc14-3	0.6687	0.02	0.76373	0.036	-0.09943	0.02	0.00031	status=JK
tRNA-Ser(UCU,G26A)	YNR026C	SEC12	sec12-1	0.87141	0.041	0.96173	0.062	-0.09775	0.041	3e-05
tRNA-Ser(UCU,G26A)	YML031W	NDC1	ndc1-4	0.28808	0.025	0.41534	0.126	-0.09768	0.025	0.00257	status=JK
tRNA-Ser(UCU,G26A)	YFL013C	IES1		0.81128	0.246	0.93793	0.066	-0.09757	0.246	0.0071
tRNA-Ser(UCU,G26A)	YFL034C-B	MOB2	mob2-26	0.56228	0.062	0.66106	0.036	-0.09604	0.062	0.00036
tRNA-Ser(UCU,G26A)	YLR440C	SEC39	sec39-1	0.90517	0.019	1.01382	0.072	-0.09566	0.019	0.00015	status=JK
tRNA-Ser(UCU,G26A)	YOR074C	CDC21	cdc21-1	0.37308	0.038	0.50278	0.141	-0.09555	0.038	0.00029
tRNA-Ser(UCU,G26A)	YOR336W	KRE5	kre5-ts2	0.86546	0.017	0.95991	0.022	-0.0952	0.017	0.00014	status=JK
tRNA-Ser(UCU,G26A)	YBR257W	POP4	pop4-ph	0.62308	0.115	0.70831	0.021	-0.09508	0.115	0.00168
tRNA-Ser(UCU,G26A)	YPR133C	SPN1	spn1-k192n	0.89602	0.124	0.99453	0.102	-0.09421	0.124	0.00072
tRNA-Ser(UCU,G26A)	YKL019W	RAM2	ykl019w-ph	0.88112	0.085	0.96601	0.051	-0.09395	0.085	0.00024
tRNA-Ser(UCU,G26A)	YKL021C	MAK11	mak11-ph	0.9272	0.033	1.01796	0.023	-0.09304	0.033	1e-05
tRNA-Ser(UCU,G26A)	YHR088W	RPF1	rpf1-ph	0.86087	0.036	0.95279	0.035	-0.09286	0.036	2e-05
tRNA-Ser(UCU,G26A)	YML127W	RSC9	rsc9-ph	0.52301	0.135	0.60904	0.008	-0.09044	0.135	0.00452
tRNA-Ser(UCU,G26A)	YBR079C	RPG1	rpg1-1	0.98725	0.053	1.08582	0.031	-0.08984	0.053	4e-05
tRNA-Ser(UCU,G26A)	YLL004W	ORC3	orc3-70	0.91409	0.01	0.99269	0.039	-0.08972	0.01	4e-05	status=JK
tRNA-Ser(UCU,G26A)	YLR197W	NOP56	nop56-ph	0.55148	0.222	0.66694	0.105	-0.08955	0.222	0.01568
tRNA-Ser(UCU,G26A)	YDL043C	PRP11	prp11-ts	0.85688	0.011	0.94854	0.024	-0.08674	0.011	6e-05	status=JK
tRNA-Ser(UCU,G26A)	YDL111C	RRP42	rrp42-ph	0.87515	0.027	0.95433	0.019	-0.08658	0.027	1e-05
tRNA-Ser(UCU,G26A)	YGL130W	CEG1	ceg1-ts	0.71375	0.032	0.80303	0.012	-0.08635	0.032	3e-05
tRNA-Ser(UCU,G26A)	YJL091C	GWT1	gwt1-20	0.8345	0.007	0.92261	0.074	-0.08617	0.007	2e-05	status=JK
tRNA-Ser(UCU,G26A)	YOR272W	YTM1	ytm1-1	0.97681	0.088	1.0617	0.027	-0.08534	0.088	0.0002
tRNA-Ser(UCU,G26A)	YFL009W	CDC4	cdc4-2	0.03656	0.049	0.16639	0.206	-0.08506	0.049	0.23163
tRNA-Ser(UCU,G26A)	YOR259C	RPT4	rpt4-145	0.9841	0.098	1.07075	0.013	-0.08499	0.098	0.00027
tRNA-Ser(UCU,G26A)	YDR145W	TAF12	taf12-9	0.90999	0.071	0.99336	0.008	-0.08459	0.071	0.00013
tRNA-Ser(UCU,G26A)	YMR049C	ERB1	erb1-ph	0.86191	0.034	0.94437	0.035	-0.08453	0.034	2e-05
tRNA-Ser(UCU,G26A)	YPR161C	SGV1	ypr161c-ph	0.94835	0.108	1.04084	0.056	-0.08297	0.108	0.0004
tRNA-Ser(UCU,G26A)	YGL022W	STT3	stt3-1	0.46485	0.146	0.53988	0.046	-0.08297	0.146	0.00778
tRNA-Ser(UCU,G26A)	YFL039C	ACT1	act1-159	0.80233	0.07	0.89281	0.034	-0.08273	0.07	0.00018
tRNA-Ser(UCU,G26A)	YPL082C	MOT1	mot1-1033	0.03431	0.028	0.11563	0.092	-0.08249	0.028	0.09171
tRNA-Ser(UCU,G26A)	YHR007C	ERG11	erg11-td	0.82146	0.027	0.90269	0.01	-0.08215	0.027	1e-05
tRNA-Ser(UCU,G26A)	YFL039C	ACT1	act1-132	1.03004	0.031	1.13435	0.056	-0.08209	0.031	0.00031	status=JK
tRNA-Ser(UCU,G26A)	YDL029W	ARP2	arp2-14	1.16414	0.054	1.24989	0.014	-0.08196	0.054	3e-05
tRNA-Ser(UCU,G26A)	YDL084W	SUB2	sub2-1	0.98428	0.113	1.06277	0.059	-0.0819	0.113	0.00042
tRNA-Ser(UCU,G26A)	YOL021C	DIS3	dis3-1	1.01043	0.049	1.0824	0.035	-0.08188	0.049	3e-05
tRNA-Ser(UCU,G26A)	YGR092W	DBF2	dbf2-3	0.90993	0.057	0.98484	0.032	-0.08023	0.057	7e-05
tRNA-Ser(UCU,G26A)	YDL020C	RPN4		0.91341	0.092	0.99045	0.032	-0.07982	0.092	0.00028
tRNA-Ser(UCU,G26A)	YLR115W	CFT2	cft2-1	0.69304	0.139	0.79235	0.077	-0.07958	0.139	0.00215
tRNA-Ser(UCU,G26A)	YBL084C	CDC27	cdc27-1	0.91262	0.092	0.98788	0.018	-0.07897	0.091	0.00028
tRNA-Ser(UCU,G26A)	YHR065C	RRP3	yhr065c-ph	0.95228	0.035	1.03427	0.015	-0.0771	0.035	1e-05
tRNA-Ser(UCU,G26A)	YPR016C	TIF6	tif6-ts4	0.95644	0.01	1.0363	0.021	-0.07579	0.01	3e-05	status=JK
tRNA-Ser(UCU,G26A)	YLR078C	BOS1	bos1-1	0.76484	0.101	0.83691	0.034	-0.07509	0.101	0.00062
tRNA-Ser(UCU,G26A)	YDL105W	NSE4	nse4-ts1	0.82347	0.072	0.89349	0.006	-0.07406	0.072	0.00018
tRNA-Ser(UCU,G26A)	YLR305C	STT4	stt4-4	0.52662	0.035	0.59897	0.009	-0.07402	0.035	0.00148	status=JK
tRNA-Ser(UCU,G26A)	YMR229C	RRP5	rrp5-delta6	0.86667	0.041	0.94205	0.033	-0.07375	0.041	0.00074	status=JK
tRNA-Ser(UCU,G26A)	YNL061W	NOP2	nop2-6	0.90486	0.04	0.96531	0.075	-0.07317	0.04	2e-05
tRNA-Ser(UCU,G26A)	YGR274C	TAF1	taf1-2	0.85067	0.044	0.91678	0.016	-0.07236	0.044	4e-05
tRNA-Ser(UCU,G26A)	YDR172W	SUP35	sup35-td	0.56882	0.056	0.63942	0.016	-0.07161	0.056	0.00026
tRNA-Ser(UCU,G26A)	YGL213C	SKI8		1.16895	0.275	1.25512	0.073	-0.07135	0.275	0.00342
tRNA-Ser(UCU,G26A)	YDR510W	SMT3	smt3-331	0.79266	0.029	0.8657	0.027	-0.07073	0.029	0.00045	status=JK
tRNA-Ser(UCU,G26A)	YDR489W	SLD5	sld5-ph	1.04978	0.074	1.11552	0.031	-0.07062	0.074	0.0001
tRNA-Ser(UCU,G26A)	YDR228C	PCF11	pcf11-ts9	1.00139	0.033	1.07863	0.071	-0.06984	0.033	0.00036	status=JK
tRNA-Ser(UCU,G26A)	YGL163C	RAD54		0.91314	0.012	0.98172	0.017	-0.06952	0.012	5e-05	status=JK
tRNA-Ser(UCU,G26A)	YOR260W	GCD1	gcd1-ph	0.65595	0.038	0.72986	0.026	-0.06934	0.038	5e-05
tRNA-Ser(UCU,G26A)	YJL034W	KAR2	kar2-159	1.00593	0.095	1.07251	0.05	-0.06929	0.095	0.00023
tRNA-Ser(UCU,G26A)	YML015C	TAF11	taf11-ts2	0.82485	0.082	0.89266	0.006	-0.0692	0.082	0.00027
tRNA-Ser(UCU,G26A)	YFR004W	RPN11	rpn11-14	0.86851	0.026	0.93776	0.003	-0.06912	0.026	1e-05
tRNA-Ser(UCU,G26A)	YML023C	NSE5	nse5-ts3	0.92454	0.04	0.99208	0.01	-0.0691	0.04	2e-05
tRNA-Ser(UCU,G26A)	YDL028C	MPS1	mps1-1	0.11131	0.029	0.16979	0.107	-0.06909	0.029	0.00479
tRNA-Ser(UCU,G26A)	YOR361C	PRT1	prt1-1	0.98574	0.01	1.06216	0.043	-0.06889	0.01	4e-05	status=JK
tRNA-Ser(UCU,G26A)	YOR075W	UFE1	ufe1-1	1.08771	0.109	1.14834	0.135	-0.06848	0.109	0.00027
tRNA-Ser(UCU,G26A)	YBR156C	SLI15	sli15-3	0.92943	0.032	1.00298	0.043	-0.06794	0.032	1e-05
tRNA-Ser(UCU,G26A)	YLR276C	DBP9	dbp9-ph	1.01284	0.02	1.08036	0.01	-0.06777	0.02	0
tRNA-Ser(UCU,G26A)	YLR212C	TUB4	tub4-y445d	0.89014	0.012	0.9535	0.004	-0.06772	0.012	6e-05	status=JK
tRNA-Ser(UCU,G26A)	YPL228W	CET1	cet1-1	0.7941	0.018	0.86159	0.009	-0.06761	0.018	0
tRNA-Ser(UCU,G26A)	YDR182W	CDC1	cdc1-6	0.63041	0.05	0.70306	0.038	-0.06664	0.05	0.00013
tRNA-Ser(UCU,G26A)	YNL075W	IMP4	imp4-2	0.70716	0.038	0.77072	0.009	-0.06623	0.038	4e-05
tRNA-Ser(UCU,G26A)	YJR073C	OPI3		0.85295	0.024	0.91749	0.01	-0.06589	0.024	0.00027	status=JK
tRNA-Ser(UCU,G26A)	YOR149C	SMP3	smp3-1	1.03489	0.161	1.11035	0.032	-0.06442	0.161	0.00102
tRNA-Ser(UCU,G26A)	YOL081W	IRA2		0.83182	0.026	0.89078	0.027	-0.06384	0.026	1e-05
tRNA-Ser(UCU,G26A)	YDR013W	PSF1	psf1-1	1.06362	0.027	1.12557	0.014	-0.06337	0.027	0
tRNA-Ser(UCU,G26A)	YDR054C	CDC34	cdc34-1	1.02598	0.096	1.09347	0.039	-0.06315	0.096	0.00023
tRNA-Ser(UCU,G26A)	YPL085W	SEC16	sec16-2	1.00738	0.109	1.067	0.038	-0.0627	0.109	0.00035
tRNA-Ser(UCU,G26A)	YIL115C	NUP159	nup159-1	0.84204	0.049	0.9127	0.048	-0.06235	0.049	5e-05
tRNA-Ser(UCU,G26A)	YFR052W	RPN12	rpn12-1	0.86243	0.058	0.91602	0.052	-0.06234	0.058	8e-05
tRNA-Ser(UCU,G26A)	YMR078C	CTF18		0.86895	0.084	0.93157	0.031	-0.06217	0.084	0.00024
tRNA-Ser(UCU,G26A)	YOR326W	MYO2	myo2-14	0.96947	0.014	1.0292	0.021	-0.06209	0.014	0
tRNA-Ser(UCU,G26A)	YPR034W	ARP7	arp7-e411k	0.32576	0.246	0.33839	0.248	-0.06206	0.246	0.0772
tRNA-Ser(UCU,G26A)	YPL043W	NOP4	nop4-3	0.44835	0.411	0.5498	0.367	-0.06188	0.411	0.11744
tRNA-Ser(UCU,G26A)	YFL039C	ACT1	act1-155	0.82399	0.005	0.88455	0.014	-0.06167	0.005	0
tRNA-Ser(UCU,G26A)	YLR298C	YHC1	yhc1-6	0.40623	0.094	0.46073	0.042	-0.06159	0.094	0.00324
tRNA-Ser(UCU,G26A)	YDL017W	CDC7	cdc7-1	0.93431	0.052	0.99296	0.044	-0.06125	0.052	5e-05
tRNA-Ser(UCU,G26A)	YKL021C	MAK11	mak11-2	0.88336	0.077	0.9384	0.015	-0.0603	0.076	0.00018
tRNA-Ser(UCU,G26A)	YJL047C	RTT101		0.99038	0.039	1.04836	0.039	-0.06006	0.039	2e-05
tRNA-Ser(UCU,G26A)	YOL069W	NUF2	nuf2-ph	1.1736	0.127	1.22847	0.053	-0.05931	0.127	0.00035
tRNA-Ser(UCU,G26A)	YPR135W	CTF4		0.87122	0.062	0.97018	0.189	-0.0592	0.062	0.00167	status=JK
tRNA-Ser(UCU,G26A)	YMR197C	VTI1	vti1-11	0.87793	0.022	0.93073	0.031	-0.05869	0.022	0
tRNA-Ser(UCU,G26A)	YDL105W	NSE4	nse4-ph	0.82474	0.154	0.86652	0.106	-0.05835	0.154	0.00173
tRNA-Ser(UCU,G26A)	YGL091C	NBP35	nbp35-ph	0.68242	0.061	0.73876	0.049	-0.05816	0.061	0.0002
tRNA-Ser(UCU,G26A)	YBL034C	STU1	stu1-8	0.98865	0.065	1.04483	0.016	-0.05808	0.065	8e-05
tRNA-Ser(UCU,G26A)	YFL039C	ACT1	act1-3	0.91323	0.043	0.97126	0.053	-0.05778	0.043	3e-05
tRNA-Ser(UCU,G26A)	YKL035W	UGP1	ugp1-ph	0.98576	0.103	1.02406	0.083	-0.05684	0.103	0.00031
tRNA-Ser(UCU,G26A)	YBL035C	POL12	pol12-ts	0.91585	0.037	0.96712	0.045	-0.05673	0.037	2e-05
tRNA-Ser(UCU,G26A)	YBR153W	RIB7	rib7-ph	1.09683	0.061	1.15142	0.04	-0.05578	0.061	5e-05
tRNA-Ser(UCU,G26A)	YIL143C	SSL2	ssl2-ts	0.85807	0.234	0.94702	0.13	-0.05549	0.234	0.00522
tRNA-Ser(UCU,G26A)	YBL084C	CDC27	cdc27-2	0.87719	0.039	0.94012	0.035	-0.05507	0.039	2e-05
tRNA-Ser(UCU,G26A)	YJL104W	PAM16	pam16-3	0.82578	0.019	0.88844	0.058	-0.05492	0.019	0.00017	status=JK
tRNA-Ser(UCU,G26A)	YER125W	RSP5	rsp5-sm1	0.60035	0.087	0.65946	0.064	-0.05491	0.087	0.00082
tRNA-Ser(UCU,G26A)	YDR364C	CDC40	cdc40-ts	0.27642	0.065	0.32965	0.109	-0.05373	0.065	0.01779	status=JK
tRNA-Ser(UCU,G26A)	YLR317W	YLR317W	ylr317w-ph	0.77342	0.041	0.82638	0.012	-0.05324	0.041	4e-05
tRNA-Ser(UCU,G26A)	YDR311W	TFB1	tfb1-6	0.47379	0.193	0.53413	0.183	-0.05256	0.193	0.01613
tRNA-Ser(UCU,G26A)	YLR056W	ERG3		0.85898	0.04	0.91595	0.054	-0.05226	0.04	3e-05
tRNA-Ser(UCU,G26A)	YER133W	GLC7	glc7-12	0.83402	0.124	0.91292	0.095	-0.05132	0.124	0.00089
tRNA-Ser(UCU,G26A)	YCR002C	CDC10	cdc10-1	1.21031	0.043	1.25327	0.013	-0.05109	0.043	1e-05
tRNA-Ser(UCU,G26A)	YHR012W	VPS29		0.90171	0.009	0.94449	0.018	-0.05096	0.009	0
tRNA-Ser(UCU,G26A)	YDR196C	CAB5	cab5-ph	0.20052	0.02	0.25275	0.069	-0.05066	0.02	0.00027
tRNA-Ser(UCU,G26A)	YLR195C	NMT1	nmt1-181	0.45041	0.099	0.50146	0.005	-0.04985	0.099	0.00277
tRNA-Ser(UCU,G26A)	YHR107C	CDC12	cdc12-1	1.43982	0.174	1.48687	0.005	-0.04952	0.174	0.00048
tRNA-Ser(UCU,G26A)	YKR008W	RSC4	rsc4-2	0.92891	0.045	0.97434	0.024	-0.04934	0.045	0.00078	status=JK
tRNA-Ser(UCU,G26A)	YGL022W	STT3	stt3-7	0.93452	0.03	0.98361	0.024	-0.04873	0.03	1e-05
tRNA-Ser(UCU,G26A)	YFL009W	CDC4	cdc4-1	1.05102	0.089	1.09799	0.021	-0.04846	0.089	0.00016
tRNA-Ser(UCU,G26A)	YCL061C	MRC1		1.06798	0.098	1.09236	0.076	-0.04792	0.098	0	status=JK
tRNA-Ser(UCU,G26A)	YKL018W	SWD2	swd2-1	0.99901	0.158	1.05213	0.025	-0.04784	0.158	0.00107
tRNA-Ser(UCU,G26A)	YPR070W	MED1		0.63989	0.029	0.67097	0.03	-0.04781	0.029	3e-05
tRNA-Ser(UCU,G26A)	YFL017C	GNA1	yfl017c-ph	0.86371	0.186	0.90851	0.017	-0.04765	0.186	0.00264
tRNA-Ser(UCU,G26A)	YPR168W	NUT2	nut2-ts	0.5185	0.01	0.56546	0.025	-0.04748	0.01	0.00012	status=JK
tRNA-Ser(UCU,G26A)	YGR009C	SEC9	sec9-4	0.08335	0.023	0.13584	0.098	-0.04741	0.023	0.02348	status=JK
tRNA-Ser(UCU,G26A)	YLR397C	AFG2	afg2-18	0.85798	0.051	0.90804	0.011	-0.0469	0.051	6e-05
tRNA-Ser(UCU,G26A)	YGL120C	PRP43	prp43-ts2	0.75477	0.079	0.80127	0.024	-0.04667	0.079	0.00031
tRNA-Ser(UCU,G26A)	YPL057C	SUR1		0.97787	0.134	1.02537	0.027	-0.04666	0.134	0.0007
tRNA-Ser(UCU,G26A)	YOR181W	LAS17	las17-1	0.5979	0.035	0.64796	0.027	-0.04628	0.035	0.00115	status=JK
tRNA-Ser(UCU,G26A)	YPR103W	PRE2	pre2-75	1.02178	0.153	1.07203	0.097	-0.04606	0.153	0.0009
tRNA-Ser(UCU,G26A)	YLR316C	TAD3	tad3-ph	0.60389	0.096	0.64818	0.013	-0.04587	0.096	0.00108
tRNA-Ser(UCU,G26A)	YHR040W	BCD1	bcd1-ph	0.97106	0.082	1.00921	0.016	-0.04502	0.082	0.00017
tRNA-Ser(UCU,G26A)	YJR046W	TAH11	tah11-ts	0.88565	0.051	0.93385	0.015	-0.04473	0.051	5e-05
tRNA-Ser(UCU,G26A)	YBR143C	SUP45	sup45-ts	0.2493	0.007	0.29957	0.035	-0.04472	0.007	0.00025	status=JK
tRNA-Ser(UCU,G26A)	YHR024C	MAS2	mas2-10	0.23376	0.015	0.28747	0.086	-0.04431	0.014	0.00128	status=JK
tRNA-Ser(UCU,G26A)	YDR145W	TAF12	taf12-w486stop	0.90623	0.042	0.94647	0.002	-0.04393	0.042	3e-05
tRNA-Ser(UCU,G26A)	YCR093W	CDC39	cdc39-1	1.06743	0.02	1.11076	0.006	-0.04326	0.02	0
tRNA-Ser(UCU,G26A)	YLR347C	KAP95	kap95-l63a	0.94129	0.083	0.98367	0.007	-0.0428	0.083	0.00019
tRNA-Ser(UCU,G26A)	YOR116C	RPO31	rpo31-698	0.86044	0.003	0.90297	0.006	-0.04267	0.003	0	status=JK
tRNA-Ser(UCU,G26A)	YKR002W	PAP1	pap1-1	1.01757	0.053	1.04225	0.054	-0.04228	0.053	4e-05
tRNA-Ser(UCU,G26A)	YJR054W	KCH1		0.0435	0.066	0.13387	0.101	-0.04167	0.066	0.37087	status=JK
tRNA-Ser(UCU,G26A)	YDR062W	LCB2	lcb2-2	0.28401	0.023	0.32748	0.006	-0.04121	0.023	0.00015
tRNA-Ser(UCU,G26A)	YKR092C	SRP40		1.01204	0.035	1.04644	0.045	-0.04027	0.035	1e-05
tRNA-Ser(UCU,G26A)	YGL207W	SPT16	spt16-ts	0.87475	0.033	0.91487	0.017	-0.03988	0.033	1e-05
tRNA-Ser(UCU,G26A)	YGL116W	CDC20	cdc20-1	1.01678	0.046	1.05777	0.008	-0.03971	0.046	3e-05
tRNA-Ser(UCU,G26A)	YKR081C	RPF2	rpf2-ph	0.94799	0.077	0.98538	0.065	-0.03949	0.077	0.00015
tRNA-Ser(UCU,G26A)	YHR196W	UTP9	utp9-ph	0.80536	0.04	0.84438	0.028	-0.03931	0.04	3e-05
tRNA-Ser(UCU,G26A)	YJR057W	CDC8	cdc8-2	0.6752	0.022	0.71154	0.006	-0.03862	0.022	1e-05
tRNA-Ser(UCU,G26A)	YPL094C	SEC62	sec62-ts	0.80089	0.027	0.84252	0.031	-0.03858	0.027	0.00038	status=JK
tRNA-Ser(UCU,G26A)	YFR027W	ECO1	eco1-1	0.6852	0.083	0.71712	0.023	-0.03829	0.083	0.00049
tRNA-Ser(UCU,G26A)	YGR135W	PRE9		1.01851	0.04	1.05442	0.035	-0.03829	0.04	0.00052	status=JK
tRNA-Ser(UCU,G26A)	YBL093C	ROX3	rox3-182	0.15485	0.024	0.19293	0.017	-0.03787	0.024	0.00101
tRNA-Ser(UCU,G26A)	YDR180W	SCC2	scc2-4	0.97211	0.027	1.00668	0.055	-0.03736	0.027	1e-05
tRNA-Ser(UCU,G26A)	YDR527W	RBA50	rba50-ph	0.90806	0.027	0.94367	0.042	-0.0366	0.027	1e-05
tRNA-Ser(UCU,G26A)	YLR005W	SSL1	ssl1-ph	1.06842	0.031	1.09844	0.008	-0.03649	0.031	1e-05
tRNA-Ser(UCU,G26A)	YOR250C	CLP1	clp1-ph	0.20193	0.125	0.24724	0.103	-0.03633	0.125	0.04811
tRNA-Ser(UCU,G26A)	YHR027C	RPN1	rpn1-821	0.88122	0.063	0.91543	0.017	-0.03522	0.063	0.0001
tRNA-Ser(UCU,G26A)	YJR043C	POL32		1.00576	0.095	1.04183	0.031	-0.03468	0.095	0.00023
tRNA-Ser(UCU,G26A)	YKL154W	SRP102	srp102-510	1.06077	0.009	1.0919	0.02	-0.03452	0.009	0
tRNA-Ser(UCU,G26A)	YGR099W	TEL2	tel2-15	1.08489	0.023	1.12137	0.006	-0.03424	0.023	0
tRNA-Ser(UCU,G26A)	YBR265W	TSC10	tsc10-1	1.00199	0.016	1.03525	0.024	-0.03414	0.016	0
tRNA-Ser(UCU,G26A)	YNL153C	GIM3		0.87092	0.117	0.90899	0.138	-0.03333	0.117	0.00066
tRNA-Ser(UCU,G26A)	YKL112W	ABF1	abf1-103	0.12532	0.052	0.14622	0.087	-0.0332	0.052	0.0171
tRNA-Ser(UCU,G26A)	YGR091W	PRP31	prp31-ts	0.99075	0.026	1.02436	0.032	-0.03317	0.026	0
tRNA-Ser(UCU,G26A)	YGR034W	RPL26B		0.942	0.076	0.97545	0.018	-0.03268	0.076	0.00014
tRNA-Ser(UCU,G26A)	YDR437W	GPI19	gpi19-2xh	0.96889	0.097	0.9974	0.018	-0.03186	0.097	0.00028
tRNA-Ser(UCU,G26A)	YAR007C	RFA1	rfa1-m2	1.02694	0.068	1.05605	0.043	-0.0312	0.068	8e-05
tRNA-Ser(UCU,G26A)	YPR103W	PRE2	pre2-1	0.95356	0.068	0.99367	0.063	-0.03117	0.068	0.0001
tRNA-Ser(UCU,G26A)	YGR091W	PRP31	prp31-1	1.05023	0.056	1.06852	0.039	-0.03111	0.056	4e-05
tRNA-Ser(UCU,G26A)	YKL032C	IXR1		0.85	0.004	0.87786	0.021	-0.03079	0.004	1e-05	status=JK
tRNA-Ser(UCU,G26A)	YLR007W	NSE1	nse1-16	0.84264	0.056	0.87325	0.045	-0.03062	0.056	8e-05
tRNA-Ser(UCU,G26A)	YOR157C	PUP1	pup1-1	1.00076	0.019	1.02659	0.001	-0.03007	0.019	0
tRNA-Ser(UCU,G26A)	YHR034C	PIH1		1.07312	0.069	1.0939	0.032	-0.0299	0.069	7e-05
tRNA-Ser(UCU,G26A)	YKR037C	SPC34	spc34-5	0.98717	0.079	1.01996	0.076	-0.02953	0.079	0.00014
tRNA-Ser(UCU,G26A)	YER125W	RSP5	rsp5-1	0.7246	0.07	0.75717	0.028	-0.02918	0.07	0.00024
tRNA-Ser(UCU,G26A)	YDL064W	UBC9	ubc9-2	1.05921	0.036	1.07523	0.039	-0.02909	0.036	1e-05
tRNA-Ser(UCU,G26A)	YLR340W	RPP0	rpp0-ph	1.10464	0.016	1.13035	0.021	-0.0286	0.016	0
tRNA-Ser(UCU,G26A)	YNL153C	GIM3		1.04499	0.131	1.06843	0.07	-0.02845	0.131	0
tRNA-Ser(UCU,G26A)	YGR179C	OKP1	okp1-5	1.09637	0.023	1.12366	0.005	-0.02841	0.023	0
tRNA-Ser(UCU,G26A)	YDR437W	GPI19	gpi19-ph	0.74625	0.077	0.77532	0.025	-0.02812	0.077	0.0003
tRNA-Ser(UCU,G26A)	YCL059C	KRR1	krr1-18	0.84049	0.055	0.86384	0.026	-0.02807	0.055	8e-05
tRNA-Ser(UCU,G26A)	YDR062W	LCB2	lcb2-1	0.32852	0.016	0.35531	0.003	-0.02796	0.016	3e-05
tRNA-Ser(UCU,G26A)	YBR079C	RPG1	rpg1-ph	1.02829	0.042	1.05441	0.005	-0.02664	0.042	2e-05
tRNA-Ser(UCU,G26A)	YKL089W	MIF2	mif2-3	0.83419	0.085	0.86885	0.068	-0.02662	0.085	0.00029
tRNA-Ser(UCU,G26A)	YAL013W	DEP1		1.05985	0.041	1.08227	0.034	-0.0266	0.041	2e-05
tRNA-Ser(UCU,G26A)	YJL115W	ASF1		0.92522	0.055	0.95407	0.011	-0.02601	0.054	6e-05
tRNA-Ser(UCU,G26A)	YDR302W	GPI11	gpi11-ph	0.86853	0.034	0.89801	0.015	-0.02531	0.034	2e-05
tRNA-Ser(UCU,G26A)	YOR262W	YOR262W	yor262w-ph	0.88165	0.262	0.89803	0.027	-0.02507	0.262	0.00671
tRNA-Ser(UCU,G26A)	YGL116W	CDC20	cdc20-3	1.10862	0.026	1.12496	0.032	-0.02502	0.026	0.00018	status=JK
tRNA-Ser(UCU,G26A)	YKL125W	RRN3	rrn3-s213p	0.90357	0.034	0.94079	0.035	-0.02482	0.034	1e-05
tRNA-Ser(UCU,G26A)	YLR298C	YHC1	yhc1-2	0.40714	0.08	0.45063	0.194	-0.02418	0.08	0.00204
tRNA-Ser(UCU,G26A)	YOR046C	DBP5	dbp5-1	0.05352	0.025	0.06715	0.024	-0.02393	0.025	0.06466	status=JK
tRNA-Ser(UCU,G26A)	YIL061C	SNP1	yil061c-ph	0.88919	0.011	0.90866	0.104	-0.02379	0.011	5e-05	status=JK
tRNA-Ser(UCU,G26A)	YPR103W	PRE2	pre2-v214a	0.98128	0.125	1.00541	0.059	-0.02349	0.125	0.00056
tRNA-Ser(UCU,G26A)	YHR172W	SPC97	yhr172w-ph	1.0761	0.036	1.09429	0.036	-0.02311	0.036	1e-05
tRNA-Ser(UCU,G26A)	YML102W	CAC2		1.09887	0.077	1.10547	0.056	-0.02282	0.077	0.0001
tRNA-Ser(UCU,G26A)	YKR037C	SPC34	spc34-7	0.98632	0.231	1.01916	0.046	-0.02268	0.231	0.00339
tRNA-Ser(UCU,G26A)	YJL081C	ARP4	arp4-g161d	0.7221	0.085	0.73614	0.019	-0.02239	0.085	0.00044
tRNA-Ser(UCU,G26A)	YMR308C	PSE1	pse1-41	0.7224	0.001	0.68995	0.325	-0.0222	0.001	0	status=JK
tRNA-Ser(UCU,G26A)	YPL020C	ULP1	ulp1-333	1.02698	0.103	1.03431	0.079	-0.02184	0.103	0.00027
tRNA-Ser(UCU,G26A)	YOR204W	DED1	ded1-f144c	0.099	0.013	0.12747	0.051	-0.02168	0.013	0.00542	status=JK
tRNA-Ser(UCU,G26A)	YPR161C	SGV1	sgv1-35	0.81036	0.206	0.81911	0.155	-0.02144	0.206	0.00429
tRNA-Ser(UCU,G26A)	YNL006W	LST8	lst8-15	1.13222	0.054	1.13363	0.057	-0.02102	0.054	3e-05
tRNA-Ser(UCU,G26A)	YDR437W	GPI19	gpi19-2	0.88664	0.008	0.90451	0.022	-0.02094	0.008	3e-05	status=JK
tRNA-Ser(UCU,G26A)	YDR478W	SNM1	snm1-172	0.96646	0.175	0.98422	0.013	-0.0208	0.175	0.00159
tRNA-Ser(UCU,G26A)	YLR163C	MAS1	mas1-1	1.09405	0.054	1.11186	0.029	-0.02075	0.054	3e-05
tRNA-Ser(UCU,G26A)	YBR060C	ORC2	orc2-1	1.09138	0.023	1.10855	0.01	-0.02063	0.023	0
tRNA-Ser(UCU,G26A)	YOR151C	RPB2	rpb2-6	0.54583	0.032	0.56647	0.036	-0.02061	0.032	6e-05
tRNA-Ser(UCU,G26A)	YCR077C	PAT1		1.06683	0.05	1.08682	0.016	-0.02	0.05	3e-05
tRNA-Ser(UCU,G26A)	YBR070C	ALG14	alg14-ph	0.72681	0.034	0.74237	0.005	-0.01995	0.034	3e-05
tRNA-Ser(UCU,G26A)	YHR200W	RPN10		1.10849	0.085	1.12605	0.007	-0.01987	0.085	0.00012
tRNA-Ser(UCU,G26A)	YGL048C	RPT6	rpt6-20	0.94102	0.018	0.96331	0.017	-0.01911	0.018	0
tRNA-Ser(UCU,G26A)	YGR005C	TFG2	tfg2-ph	0.99195	0.022	1.03155	0.043	-0.01897	0.022	0.00016	status=JK
tRNA-Ser(UCU,G26A)	YIL104C	SHQ1	shq1-ph	0.95956	0.017	0.97759	0.028	-0.01895	0.017	0
tRNA-Ser(UCU,G26A)	YGR274C	TAF1	taf1-1	1.0222	0.059	1.03689	0.012	-0.01879	0.059	5e-05
tRNA-Ser(UCU,G26A)	YIL046W	MET30	met30-6	0.86943	0.182	0.87433	0.059	-0.01876	0.182	0.00243
tRNA-Ser(UCU,G26A)	YDR189W	SLY1	sly1-ts	1.07002	0.052	1.08844	0.056	-0.01823	0.052	3e-05
tRNA-Ser(UCU,G26A)	YLR342W	FKS1		0.98486	0.038	0.99915	0.024	-0.0177	0.038	2e-05
tRNA-Ser(UCU,G26A)	YBL040C	ERD2	erd2-ph	1.0182	0.102	1.02989	0.073	-0.01722	0.102	0.00027
tRNA-Ser(UCU,G26A)	YAL041W	CDC24	cdc24-11	1.05118	0.146	1.05715	0.063	-0.01721	0.146	0.00073
tRNA-Ser(UCU,G26A)	YJR112W	NNF1	nnf1-77	1.12237	0.048	1.13152	0.018	-0.01715	0.048	2e-05
tRNA-Ser(UCU,G26A)	YCL061C	MRC1		1.02854	0.024	1.04484	0.01	-0.01704	0.024	0
tRNA-Ser(UCU,G26A)	YJL001W	PRE3	pre3-2	1.16684	0.049	1.18016	0.011	-0.01688	0.049	2e-05
tRNA-Ser(UCU,G26A)	YBR058C-A	TSC3	tsc3-2	0.37757	0.062	0.39553	0.068	-0.01679	0.062	0.00117
tRNA-Ser(UCU,G26A)	YPR016C	TIF6	ypr016c-ph	0.71256	0.186	0.67129	0.235	-0.01619	0.186	0.00462
tRNA-Ser(UCU,G26A)	YJR065C	ARP3	arp3-g302y	0	0	0.06647	0.102	-0.0161	0	#NUM!
tRNA-Ser(UCU,G26A)	YMR235C	RNA1	rna1-s116f	0.81883	0.024	0.82867	0.02	-0.01509	0.024	1e-05
tRNA-Ser(UCU,G26A)	YBL097W	BRN1	brn1-16	1.09224	0.033	1.10384	0.003	-0.01422	0.033	1e-05
tRNA-Ser(UCU,G26A)	YHR019C	DED81	ded81-ph	1.22169	0.012	1.24447	0.043	-0.01392	0.012	3e-05	status=JK
tRNA-Ser(UCU,G26A)	YPR086W	SUA7	ypr086w-ph	0.25165	0.134	0.24325	0.044	-0.01342	0.133	0.03269
tRNA-Ser(UCU,G26A)	YLR026C	SED5	sed5-1	0.81431	0.06	0.82087	0.033	-0.01327	0.06	0.00011
tRNA-Ser(UCU,G26A)	YPR019W	MCM4	mcm4-ph	1.22987	0.054	1.23615	0.011	-0.01306	0.054	2e-05
tRNA-Ser(UCU,G26A)	YMR281W	GPI12	gpi12-ph	0.97353	0.047	0.98469	0.021	-0.01299	0.047	3e-05
tRNA-Ser(UCU,G26A)	YPL174C	NIP100		0.97863	0.04	0.99477	0.006	-0.01279	0.04	2e-05
tRNA-Ser(UCU,G26A)	YIL021W	RPB3	rpb3-2	0.97424	0.04	0.98497	0.041	-0.01234	0.04	2e-05
tRNA-Ser(UCU,G26A)	YFR031C	SMC2	smc2-8	0.08672	0.01	0.10028	0.044	-0.01216	0.01	0.00041
tRNA-Ser(UCU,G26A)	YFL039C	ACT1	act1-136	1.01808	0.03	1.02795	0.019	-0.01131	0.03	1e-05
tRNA-Ser(UCU,G26A)	YBR234C	ARC40	arc40-ph	1.09442	0.024	1.10297	0.006	-0.01125	0.024	0.00016	status=JK
tRNA-Ser(UCU,G26A)	YFL039C	ACT1	act1-121	1.1893	0.021	1.19813	0.019	-0.01072	0.021	0
tRNA-Ser(UCU,G26A)	YJL203W	PRP21	prp21-ts	0.82611	0.054	0.82323	0.024	-0.00976	0.054	8e-05
tRNA-Ser(UCU,G26A)	YGL043W	DST1		1.11678	0.032	1.12306	0.037	-0.00954	0.032	1e-05
tRNA-Ser(UCU,G26A)	YDR449C	UTP6	ydr449c-ph	1.07801	0.069	1.09782	0.083	-0.00935	0.069	7e-05
tRNA-Ser(UCU,G26A)	YNL118C	DCP2	dcp2-7d	0.39102	0.063	0.38767	0.087	-0.00879	0.063	0.00112
tRNA-Ser(UCU,G26A)	YLR298C	YHC1	yhc1-7	0.17747	0.01	0.17256	0.081	-0.00822	0.01	0.00103	status=JK
tRNA-Ser(UCU,G26A)	YKL052C	ASK1	ask1-3	1.14447	0.005	1.14506	0.024	-0.00766	0.005	1e-05	status=JK
tRNA-Ser(UCU,G26A)	YGL066W	SGF73		0.93208	0.016	0.94537	0.047	-0.00728	0.016	9e-05	status=JK
tRNA-Ser(UCU,G26A)	YFL039C	ACT1	act1-122	1.08328	0.043	1.08985	0.051	-0.00722	0.043	2e-05
tRNA-Ser(UCU,G26A)	YIL147C	SLN1	sln1-ts4	1.00789	0.186	0.9961	0.038	-0.00685	0.186	0.00168
tRNA-Ser(UCU,G26A)	YKL112W	ABF1	abf1-101	1.02471	0.046	1.03026	0.009	-0.00676	0.046	3e-05
tRNA-Ser(UCU,G26A)	YOR341W	RPA190	rpa190-1	1.03831	0.025	1.03766	0.031	-0.00672	0.025	0
tRNA-Ser(UCU,G26A)	YDR356W	SPC110	spc110-220	0.93819	0.031	0.94431	0.003	-0.00652	0.031	1e-05
tRNA-Ser(UCU,G26A)	YMR028W	TAP42	tap42-11	1.1273	0.051	1.13223	0.045	-0.00622	0.051	3e-05
tRNA-Ser(UCU,G26A)	YKL203C	TOR2	tor2-21	0.77273	0.022	0.77372	0.023	-0.0059	0.022	1e-05
tRNA-Ser(UCU,G26A)	YLR066W	SPC3	spc3-4	1.18744	0.004	1.19352	0.01	-0.00568	0.004	0	status=JK
tRNA-Ser(UCU,G26A)	YPR016C	TIF6	tif6-ts1	0.86138	0.07	0.86591	0.043	-0.00531	0.07	0.00015
tRNA-Ser(UCU,G26A)	YAR019C	CDC15	cdc15-1	1.09458	0.068	1.09638	0.022	-0.00518	0.068	7e-05
tRNA-Ser(UCU,G26A)	YLR005W	SSL1	ssl1-t242i	0.54928	0.046	0.56688	0.121	-0.00474	0.046	0.00016
tRNA-Ser(UCU,G26A)	YPR176C	BET2	bet2-1	0.94725	0.032	0.95027	0.027	-0.0045	0.032	1e-05
tRNA-Ser(UCU,G26A)	YML064C	TEM1	tem1-3	1.15304	0.125	1.16849	0.09	-0.00441	0.125	0.00035
tRNA-Ser(UCU,G26A)	YIL126W	STH1	sth1-3	0.77515	0.136	0.78676	0.186	-0.00436	0.136	0.00145
tRNA-Ser(UCU,G26A)	YBR055C	PRP6	prp6-1	1.25276	0.01	1.25408	0.017	-0.0031	0.01	2e-05	status=JK
tRNA-Ser(UCU,G26A)	YDR310C	SUM1		1.16977	0.048	1.1698	0.056	-0.00301	0.048	2e-05
tRNA-Ser(UCU,G26A)	YLR100W	ERG27	erg27-ph	0.72406	0.003	0.74508	0.072	-0.00296	0.003	1e-05	status=JK
tRNA-Ser(UCU,G26A)	YOR103C	OST2	ost2-ph	0.17088	0.111	0.16313	0.057	-0.00254	0.111	0.05419
tRNA-Ser(UCU,G26A)	YGL116W	CDC20	cdc20-2	1.36737	0.011	1.36779	0.011	-0.00251	0.011	2e-05	status=JK
tRNA-Ser(UCU,G26A)	YIL046W	MET30	met30-9	1.05929	0.108	1.08112	0.042	-0.00237	0.108	0.00029
tRNA-Ser(UCU,G26A)	YDR394W	RPT3	rpt3-1	1.17018	0.054	1.17247	0.031	-0.00231	0.054	3e-05
tRNA-Ser(UCU,G26A)	YBR060C	ORC2	orc2-4	0.93119	0.12	0.91754	0.094	-0.00215	0.12	0.00058
tRNA-Ser(UCU,G26A)	YDR091C	RLI1	rli1-ph	1.04132	0.067	1.04355	0.001	-0.00184	0.067	7e-05
tRNA-Ser(UCU,G26A)	YKL060C	FBA1	ykl060c-ph	0.94607	0.078	0.94561	0.058	-0.00038	0.078	0.00015
tRNA-Ser(UCU,G26A)	YJL046W	AIM22		1.10191	0.021	1.10856	0.046	-0.00022	0.021	0
tRNA-Ser(UCU,G26A)	YMR205C	PFK2		0	0	0	0	0	0	#NUM!	status=JK
tRNA-Ser(UCU,G26A)	YPR161C	SGV1	sgv1-23	0	0	0.008	0.014	0	0	#NUM!
tRNA-Ser(UCU,G26A)	YKL013C	ARC19	ykl013c-ph	0	0	0	0	0	0	#NUM!	status=JK
tRNA-Ser(UCU,G26A)	YJL173C	RFA3	rfa3-313	0	0	0	0	0	0	#NUM!	status=JK
tRNA-Ser(UCU,G26A)	YOR257W	CDC31	cdc31-1	0	0	0	0	0	0	#NUM!
tRNA-Ser(UCU,G26A)	YJR065C	ARP3	arp3-h161a	0	0	0	0	0	0	#NUM!	status=JK
tRNA-Ser(UCU,G26A)	YDR054C	CDC34	cdc34-2	0	0	0	0	0	0	#NUM!
tRNA-Ser(UCU,G26A)	YDR145W	TAF12	taf12-l464a	0	0	0	0	0	0	#NUM!
tRNA-Ser(UCU,G26A)	YDL030W	PRP9	prp9-1	0	0	0	0	0	0	#NUM!
tRNA-Ser(UCU,G26A)	YMR001C	CDC5	cdc5-1	0	0	0	0	0	0	#NUM!	status=JK
tRNA-Ser(UCU,G26A)	YOR181W	LAS17	las17-13	0	0	0.00591	0.01	0	0	#NUM!	status=JK
tRNA-Ser(UCU,G26A)	YJL019W	MPS3	mps3-7	0	0	0	0	0	0	#NUM!	status=JK
tRNA-Ser(UCU,G26A)	YER168C	CCA1	cca1-1	0	0	0	0	0	0	#NUM!
tRNA-Ser(UCU,G26A)	YGR122W	YGR122W		0	0	0	0	0	0	#NUM!	status=JK
tRNA-Ser(UCU,G26A)	YFL022C	FRS2	frs2-ph	0	0	0	0	0	0	#NUM!
tRNA-Ser(UCU,G26A)	YOR329C	SCD5	scd5-d338	0	0	0	0	0	0	#NUM!
tRNA-Ser(UCU,G26A)	YOR249C	APC5	apc5-ca-paps	0	0	0	0	0	0	#NUM!
tRNA-Ser(UCU,G26A)	YKL203C	TOR2	tor2-29	0	0	0	0	0	0	#NUM!	status=JK
tRNA-Ser(UCU,G26A)	YBL034C	STU1	stu1-7	0	0	0	0	0	0	#NUM!	status=JK
tRNA-Ser(UCU,G26A)	YPR161C	SGV1	sgv1-80	0	0	0	0	0	0	#NUM!
tRNA-Ser(UCU,G26A)	YBR049C	REB1	reb1-ph	0	0	0	0	0	0	#NUM!
tRNA-Ser(UCU,G26A)	YDL028C	MPS1	mps1-6	0	0	0	0	0	0	#NUM!
tRNA-Ser(UCU,G26A)	YOR329C	SCD5	scd5-pp1d2	0	0	0	0	0	0	#NUM!
tRNA-Ser(UCU,G26A)	YDR292C	SRP101	srp101-47	0	0	0	0	0	0	#NUM!	status=JK
tRNA-Ser(UCU,G26A)	YDR156W	RPA14		1.04842	0.131	1.05489	0.07	1e-05	0.131	0.00053
tRNA-Ser(UCU,G26A)	YDR512C	EMI1		1.03157	0.012	1.04105	0.034	8e-05	0.012	0
tRNA-Ser(UCU,G26A)	YGL075C	MPS2	mps2-2	0.25448	0.134	0.2558	0.075	0.00027	0.134	0.03217
tRNA-Ser(UCU,G26A)	YOR244W	ESA1	esa1-1851	0.00095	0.002	0.01672	0.029	0.00095	0.002	0.42265	status=JK
tRNA-Ser(UCU,G26A)	YOR257W	CDC31	cdc31-2	0.00142	0.002	0	0	0.00142	0.002	0.42265	status=JK
tRNA-Ser(UCU,G26A)	YLR378C	SEC61	sec61-2	1.03636	0.078	1.04695	0.031	0.00176	0.078	0.00186	status=JK
tRNA-Ser(UCU,G26A)	YPR179C	HDA3		1.03332	0.029	1.03452	0.037	0.00191	0.029	1e-05
tRNA-Ser(UCU,G26A)	YDL008W	APC11	apc11-22	0.00192	0.003	0.0001	0	0.00192	0.003	0.42265	status=JK
tRNA-Ser(UCU,G26A)	YMR277W	FCP1	fcp1-1	1.13534	0.045	1.12266	0.012	0.00206	0.045	2e-05
tRNA-Ser(UCU,G26A)	YBR200W	BEM1		1.16088	0.129	1.05866	0.172	0.00219	0.129	0.00037
tRNA-Ser(UCU,G26A)	YGR048W	UFD1	ufd1-2	0.00233	0.004	0	0	0.00233	0.004	0.42265	status=JK
tRNA-Ser(UCU,G26A)	YOL069W	NUF2	nuf2-61	1.12032	0.029	1.12045	0.013	0.00237	0.029	0.00022	status=JK
tRNA-Ser(UCU,G26A)	YDL103C	QRI1	qri1-ts6	1.0602	0.007	1.06418	0.03	0.00281	0.007	1e-05	status=JK
tRNA-Ser(UCU,G26A)	YGL155W	CDC43	cdc43-2	0.8363	0.032	0.83281	0.012	0.00294	0.032	2e-05
tRNA-Ser(UCU,G26A)	YMR154C	RIM13		1.04757	0.014	1.03854	0.053	0.00342	0.014	6e-05	status=JK
tRNA-Ser(UCU,G26A)	YFR051C	RET2	ret2-1	1.15685	0.053	1.15668	0.072	0.00354	0.053	3e-05
tRNA-Ser(UCU,G26A)	YGR158C	MTR3	mtr3-ts	0.41358	0.245	0.43623	0.148	0.0039	0.245	0.04317
tRNA-Ser(UCU,G26A)	YFL034C-B	MOB2	mob2-38	0.97018	0.075	0.96828	0.047	0.00414	0.075	0.00013
tRNA-Ser(UCU,G26A)	YMR271C	URA10		1.0224	0.118	1.01937	0.077	0.00465	0.118	0	status=JK;status=BG
tRNA-Ser(UCU,G26A)	YHR186C	KOG1	kog1-1	1.11174	0.026	1.10363	0.049	0.00541	0.026	0
tRNA-Ser(UCU,G26A)	YDL090C	RAM1	ram1-119	0.95308	0.077	0.94241	0.025	0.00585	0.077	0.00015
tRNA-Ser(UCU,G26A)	YFL001W	DEG1		0.7586	0.164	0.75523	0.087	0.00631	0.164	0.00268
tRNA-Ser(UCU,G26A)	YOL094C	RFC4	rfc4-20	0.97815	0.034	0.97322	0.057	0.007	0.034	1e-05
tRNA-Ser(UCU,G26A)	YPR190C	RPC82	ypr190c-ph	1.10931	0.091	1.10306	0.013	0.00729	0.091	0.00015
tRNA-Ser(UCU,G26A)	YDR062W	LCB2	lcb2-16	0.55674	0.024	0.55318	0.042	0.00788	0.024	0.00064	status=JK
tRNA-Ser(UCU,G26A)	YMR271C	URA10		1.02592	0.135	1.0209	0.08	0.00859	0.135	0	status=JK;status=BG
tRNA-Ser(UCU,G26A)	YCR002C	CDC10	cdc10-4	1.12496	0.042	1.11292	0.028	0.00869	0.042	1e-05
tRNA-Ser(UCU,G26A)	YHR191C	CTF8		1.08884	0.029	1.0879	0.036	0.00931	0.029	1e-05
tRNA-Ser(UCU,G26A)	YFL039C	ACT1	act1-101	1.07999	0.023	1.06747	0.024	0.0095	0.023	0
tRNA-Ser(UCU,G26A)	YLR249W	YEF3	yef3-f650s	0.23455	0.09	0.23536	0.092	0.00992	0.09	0.0137
tRNA-Ser(UCU,G26A)	YJR139C	HOM6		0.97074	0.044	0.96051	0.005	0.01021	0.044	3e-05
tRNA-Ser(UCU,G26A)	YKR068C	BET3	bet3-ph	0.17891	0.039	0.16822	0.113	0.01136	0.039	0.01536	status=JK
tRNA-Ser(UCU,G26A)	YGR211W	ZPR1	zpr1-1	0.71527	0.022	0.70959	0.037	0.01172	0.022	1e-05
tRNA-Ser(UCU,G26A)	YBR193C	MED8	med8-39	1.01391	0.059	1.00187	0.002	0.01243	0.059	5e-05
tRNA-Ser(UCU,G26A)	YCL059C	KRR1	krr1-17	1.09051	0.051	1.07586	0.001	0.01331	0.051	3e-05
tRNA-Ser(UCU,G26A)	YOR294W	RRS1	rrs1-84	1.08631	0.036	1.06916	0.005	0.01371	0.036	1e-05
tRNA-Ser(UCU,G26A)	YPR023C	EAF3		1.1565	0.084	1.14338	0.01	0.01375	0.084	0.0001
tRNA-Ser(UCU,G26A)	YPR175W	DPB2	dpb2-1	0.99469	0.046	0.97688	0.054	0.01391	0.046	3e-05
tRNA-Ser(UCU,G26A)	YNR017W	TIM23	tim23-ph	0.83636	0.037	0.81851	0.019	0.01442	0.037	2e-05
tRNA-Ser(UCU,G26A)	YOL130W	ALR1	yol130w-ph	0.47199	0.006	0.45588	0.049	0.0145	0.006	0
tRNA-Ser(UCU,G26A)	YBL023C	MCM2	mcm2-1	1.22653	0.02	1.21976	0.037	0.01458	0.02	9e-05	status=JK
tRNA-Ser(UCU,G26A)	YPR033C	HTS1	hts1-1	0.46901	0.544	0.45727	0.528	0.01461	0.544	0.18308
tRNA-Ser(UCU,G26A)	YGR094W	VAS1	ygr094w-ph	1.11877	0.056	1.10114	0.049	0.01502	0.056	4e-05
tRNA-Ser(UCU,G26A)	YOR196C	LIP5		1.01248	0.031	1.00153	0.059	0.01512	0.031	1e-05
tRNA-Ser(UCU,G26A)	YLR105C	SEN2	sen2-1	1.04424	0.012	1.02878	0.004	0.01516	0.012	5e-05	status=JK
tRNA-Ser(UCU,G26A)	YGR092W	DBF2	dbf2-1	1.05184	0.039	1.03692	0.033	0.01522	0.039	1e-05
tRNA-Ser(UCU,G26A)	YDR498C	SEC20	sec20-1	0.90914	0.007	0.89575	0.018	0.01535	0.007	2e-05	status=JK
tRNA-Ser(UCU,G26A)	YDR460W	TFB3	tfb3-ts	0.18918	0.009	0.17171	0.022	0.01537	0.009	3e-05
tRNA-Ser(UCU,G26A)	YGR172C	YIP1	yip1-4	0.28417	0.004	0.30965	0.16	0.01541	0.004	6e-05	status=JK
tRNA-Ser(UCU,G26A)	YNL102W	POL1	pol1-ts	1.04289	0.009	1.01985	0.027	0.01551	0.009	2e-05	status=JK
tRNA-Ser(UCU,G26A)	YPR108W	RPN7	rpn7-3	0.62657	0.094	0.50638	0.358	0.01562	0.094	0.00738	status=JK
tRNA-Ser(UCU,G26A)	YLR045C	STU2	stu2-13	1.17705	0.109	1.15119	0.094	0.01563	0.109	0.00022
tRNA-Ser(UCU,G26A)	YDR299W	BFR2	bfr2-ph	0.63287	0.041	0.61412	0.006	0.01569	0.041	7e-05
tRNA-Ser(UCU,G26A)	YBR109C	CMD1	cmd1-1	0.99021	0.016	0.97676	0.005	0.01621	0.016	0
tRNA-Ser(UCU,G26A)	YGL130W	CEG1	ceg1-c354	0.06521	0.004	0.03945	0.026	0.01652	0.004	0.0014	status=JK
tRNA-Ser(UCU,G26A)	YFL039C	ACT1	act1-2	0.4889	0.093	0.45329	0.112	0.01656	0.093	0.00182
tRNA-Ser(UCU,G26A)	YAL003W	EFB1	efb1-4	0.59168	0.685	0.58802	0.679	0.01656	0.685	0.18245
tRNA-Ser(UCU,G26A)	YMR271C	URA10		1.03066	0.142	1.01312	0.083	0.01667	0.142	0	status=JK;status=BG
tRNA-Ser(UCU,G26A)	YLR060W	FRS1	ylr060w-ph	0.76332	0.119	0.76711	0.073	0.01668	0.119	0.00101
tRNA-Ser(UCU,G26A)	YPR055W	SEC8	sec8-9	1.1936	0.03	1.17366	0.014	0.01668	0.03	0
tRNA-Ser(UCU,G26A)	YHR036W	BRL1	brl1-2221	1.11619	0.038	1.10122	0.059	0.01689	0.038	1e-05
tRNA-Ser(UCU,G26A)	YOR257W	CDC31	cdc31-5	0.05471	0.075	0.05213	0.055	0.01703	0.075	0.24231
tRNA-Ser(UCU,G26A)	YDR303C	RSC3	rsc3-1	1.16972	0.036	1.14226	0.041	0.0172	0.036	1e-05
tRNA-Ser(UCU,G26A)	YGL233W	SEC15	sec15-1	1.08911	0.04	1.07635	0.015	0.01754	0.04	1e-05
tRNA-Ser(UCU,G26A)	YBR026C	ETR1		1.07867	0.039	1.06839	0.043	0.01805	0.039	1e-05
tRNA-Ser(UCU,G26A)	YGR229C	SMI1		1.01049	0.012	0.98608	0.007	0.01834	0.012	5e-05	status=JK
tRNA-Ser(UCU,G26A)	YMR117C	SPC24	spc24-9	1.22249	0.021	1.22132	0.068	0.01843	0.021	0.0001	status=JK
tRNA-Ser(UCU,G26A)	YLR459W	GAB1	gab1-1	1.10703	0.108	1.08692	0.021	0.01869	0.108	0.00026
tRNA-Ser(UCU,G26A)	YMR271C	URA10		1.03119	0.116	1.01955	0.076	0.01873	0.116	0	status=BG;status=JK
tRNA-Ser(UCU,G26A)	YOR232W	MGE1	mge1-100	1.11195	0.027	1.10798	0.051	0.0188	0.027	0.0002	status=JK
tRNA-Ser(UCU,G26A)	YJR007W	SUI2	yjr007w-ph	0.98204	0.153	0.97469	0.066	0.0191	0.153	0.00102
tRNA-Ser(UCU,G26A)	YGL093W	SPC105	spc105-15	1.14712	0.047	1.13153	0.036	0.01949	0.047	2e-05
tRNA-Ser(UCU,G26A)	YOL123W	HRP1	hrp1-4	0.37687	0.081	0.37038	0.032	0.01952	0.081	0.00266
tRNA-Ser(UCU,G26A)	YMR296C	LCB1	lcb1-5	0.90397	0.006	0.87919	0.028	0.02007	0.006	1e-05	status=JK
tRNA-Ser(UCU,G26A)	YOR085W	OST3		1.19597	0.05	1.17578	0.024	0.02037	0.05	2e-05
tRNA-Ser(UCU,G26A)	YOR035C	SHE4		1.10574	0.045	1.07876	0.044	0.02042	0.045	2e-05
tRNA-Ser(UCU,G26A)	YBR211C	AME1	ame1-4	1.18142	0.041	1.15356	0.021	0.02046	0.041	1e-05
tRNA-Ser(UCU,G26A)	YDR123C	INO2		0.13607	0.003	0.11799	0.006	0.02086	0.003	0
tRNA-Ser(UCU,G26A)	YML010W	SPT5	spt5-194	0.0209	0.017	0.01417	0.025	0.02089	0.017	0.17167	status=JK
tRNA-Ser(UCU,G26A)	YPR085C	ASA1	ypr085c-ph	0.89888	0.095	0.87478	0.03	0.02093	0.095	0.00033
tRNA-Ser(UCU,G26A)	YLR086W	SMC4	smc4-1	0.93137	0.118	0.88633	0.131	0.02105	0.118	0.00055
tRNA-Ser(UCU,G26A)	YHR191C	CTF8	ctf8-162	0.76265	0.053	0.74475	0.066	0.0214	0.053	9e-05
tRNA-Ser(UCU,G26A)	YDR141C	DOP1	dop1-1	1.15613	0.036	1.1353	0.025	0.02148	0.036	1e-05
tRNA-Ser(UCU,G26A)	YOR168W	GLN4	gln4-ph	1.10193	0.046	1.08415	0.019	0.02158	0.046	2e-05
tRNA-Ser(UCU,G26A)	YJR068W	RFC2	rfc2-1	1.05956	0.039	1.04133	0.053	0.02164	0.039	1e-05
tRNA-Ser(UCU,G26A)	YBR253W	SRB6	srb6-ph	1.17379	0.02	1.14491	0.035	0.0218	0.02	0.0001	status=JK
tRNA-Ser(UCU,G26A)	YER161C	SPT2		1.00038	0.042	0.97935	0.046	0.02188	0.042	2e-05
tRNA-Ser(UCU,G26A)	YML069W	POB3	pob3-q308k	0.17438	0.009	0.14998	0.005	0.02232	0.009	4e-05
tRNA-Ser(UCU,G26A)	YPL255W	BBP1	bbp1-2	0.04066	0.033	0.01779	0.009	0.02235	0.033	0.0923
tRNA-Ser(UCU,G26A)	YOL066C	RIB2	rib2-ph	0.99083	0.057	0.96888	0.022	0.02294	0.057	5e-05
tRNA-Ser(UCU,G26A)	YPL252C	YAH1	yah1-ts	0.07074	0.095	0.06523	0.081	0.02311	0.095	0.23381
tRNA-Ser(UCU,G26A)	YDR167W	TAF10	taf10-ts34	0.23368	0.239	0.2297	0.213	0.02322	0.239	0.14515
tRNA-Ser(UCU,G26A)	YIR006C	PAN1	pan1-4	0.98412	0.051	0.94966	0.051	0.02322	0.051	4e-05
tRNA-Ser(UCU,G26A)	YPR183W	DPM1	dpm1-6	0.96183	0.038	0.94133	0.006	0.02332	0.038	2e-05
tRNA-Ser(UCU,G26A)	YOR030W	DFG16		0.97834	0.082	0.94822	0.029	0.02369	0.082	0.00016
tRNA-Ser(UCU,G26A)	YER093C	TSC11	tsc11-5	0.93241	0.066	0.90914	0.004	0.02377	0.066	0.0001
tRNA-Ser(UCU,G26A)	YJL039C	NUP192	nup192-15	0.99843	0.031	0.97197	0.04	0.02389	0.031	1e-05
tRNA-Ser(UCU,G26A)	YBL105C	PKC1	pkc1-ts	1.17047	0.006	1.15018	0.016	0.024	0.006	1e-05	status=JK
tRNA-Ser(UCU,G26A)	YER171W	RAD3	rad3-ts14	0.16585	0.085	0.11691	0.107	0.0242	0.085	0.02973
tRNA-Ser(UCU,G26A)	YFL039C	ACT1	act1-133	0.93367	0.022	0.91059	0.03	0.02423	0.022	0
tRNA-Ser(UCU,G26A)	YDL028C	MPS1	mps1-3796	1.059	0.026	1.03711	0.026	0.02459	0.026	0
tRNA-Ser(UCU,G26A)	YOR046C	DBP5	dbp5-2	0.10091	0.095	0.10854	0.057	0.0248	0.095	0.12323
tRNA-Ser(UCU,G26A)	YNL038W	GPI15	gpi15-ph	1.05032	0.022	1.03557	0.038	0.0251	0.022	0
tRNA-Ser(UCU,G26A)	YNL091W	NST1		1.11845	0.129	1.10459	0.022	0.02583	0.129	0.00041
tRNA-Ser(UCU,G26A)	YGL045W	RIM8		1.04206	0.012	1.02456	0.061	0.02618	0.012	4e-05	status=JK
tRNA-Ser(UCU,G26A)	YGR113W	DAM1	dam1-1	0.94994	0.175	0.9272	0.124	0.02619	0.175	0.00167
tRNA-Ser(UCU,G26A)	YAL002W	VPS8		1.1326	0.037	1.10649	0.027	0.02689	0.037	1e-05
tRNA-Ser(UCU,G26A)	YOR275C	RIM20		1.01146	0.067	1.01095	0.084	0.02734	0.067	8e-05
tRNA-Ser(UCU,G26A)	YJL035C	TAD2	tad2-ph	1.20809	0.054	1.16811	0.039	0.02743	0.054	2e-05
tRNA-Ser(UCU,G26A)	YPR055W	SEC8	sec8-6	1.14032	0.049	1.10106	0.067	0.02786	0.048	2e-05
tRNA-Ser(UCU,G26A)	YNL067W	RPL9B		1.05387	0.071	1.02383	0.026	0.02791	0.071	8e-05
tRNA-Ser(UCU,G26A)	YML125C	PGA3	pga3-ph	1.19818	0.086	1.15976	0.038	0.02798	0.086	0.0001
tRNA-Ser(UCU,G26A)	YPL101W	ELP4		0.92534	0.067	0.90278	0.043	0.02844	0.067	0.00011
tRNA-Ser(UCU,G26A)	YKR086W	PRP16	prp16-2	1.10693	0.047	1.07755	0.013	0.02858	0.047	2e-05
tRNA-Ser(UCU,G26A)	YDR166C	SEC5	sec5-24	1.15565	0.008	1.1262	0.029	0.02879	0.008	2e-05	status=JK
tRNA-Ser(UCU,G26A)	YKL173W	SNU114	snu114-40	1.12743	0.037	1.09818	0.007	0.0289	0.037	1e-05
tRNA-Ser(UCU,G26A)	YPR025C	CCL1	ccl1-ts4	1.16923	0.051	1.1403	0.005	0.02909	0.051	2e-05
tRNA-Ser(UCU,G26A)	YBR087W	RFC5	rfc5-1	1.08001	0.146	1.059	0.068	0.02913	0.146	0.00067
tRNA-Ser(UCU,G26A)	YER092W	IES5		0.9219	0.037	0.88777	0.005	0.02924	0.037	2e-05
tRNA-Ser(UCU,G26A)	YPL228W	CET1	cet1-15	1.04067	0.027	1.01107	0.009	0.02967	0.027	0
tRNA-Ser(UCU,G26A)	YDR228C	PCF11	pcf11-ts10	1.0893	0.04	1.05746	0.027	0.03061	0.04	1e-05
tRNA-Ser(UCU,G26A)	YLR293C	GSP1	gsp1-p162l	0.9382	0.007	0.90393	0.014	0.03082	0.007	0
tRNA-Ser(UCU,G26A)	YOR089C	VPS21		1.07514	0.071	1.04438	0.008	0.03091	0.07	8e-05
tRNA-Ser(UCU,G26A)	YDL030W	PRP9	prp9-ts	0.47428	0.126	0.46078	0.155	0.03133	0.126	0.00489
tRNA-Ser(UCU,G26A)	YFL008W	SMC1	smc1-259	1.10693	0.079	1.07895	0.066	0.03169	0.079	0.0001
tRNA-Ser(UCU,G26A)	YOR014W	RTS1		0.97947	0.036	0.95074	0.015	0.03194	0.036	1e-05
tRNA-Ser(UCU,G26A)	YDR060W	MAK21	mak21-1	1.05379	0.041	1.01911	0.009	0.0321	0.041	2e-05
tRNA-Ser(UCU,G26A)	YOR204W	DED1	ded1-199	1.1162	0.099	1.0802	0.012	0.03332	0.099	0.00019
tRNA-Ser(UCU,G26A)	YPR103W	PRE2	pre2-2	0.99021	0.094	0.96267	0.105	0.03364	0.094	0.00023
tRNA-Ser(UCU,G26A)	YOR322C	LDB19		1.12477	0.04	1.08911	0.035	0.03367	0.04	1e-05
tRNA-Ser(UCU,G26A)	YJR065C	ARP3	arp3-31	0.21052	0.234	0.17462	0.144	0.03439	0.234	0.1696
tRNA-Ser(UCU,G26A)	YMR112C	MED11	med11-ts	0.34373	0.006	0.30651	0.015	0.03442	0.006	0.00012	status=JK
tRNA-Ser(UCU,G26A)	YDR044W	HEM13	hem13-ph	0.96445	0.052	0.93165	0.013	0.03459	0.052	4e-05
tRNA-Ser(UCU,G26A)	YLR116W	MSL5	msl5-9	1.11348	0.044	1.07048	0.046	0.03463	0.044	2e-05
tRNA-Ser(UCU,G26A)	YPL160W	CDC60	cdc60-ts	1.13552	0.026	1.09302	0.02	0.03467	0.026	0
tRNA-Ser(UCU,G26A)	YCR052W	RSC6	rsc6-ph	1.15657	0.056	1.13549	0.055	0.03472	0.056	3e-05
tRNA-Ser(UCU,G26A)	YGR156W	PTI1	pti1-ts7	1.13823	0.023	1.10202	0.006	0.0351	0.023	0
tRNA-Ser(UCU,G26A)	YLL002W	RTT109		0.98669	0.058	0.95255	0.037	0.03531	0.058	6e-05
tRNA-Ser(UCU,G26A)	YNL061W	NOP2	nop2-10	0.03558	0.062	0	0	0.03556	0.062	0.42265	status=JK
tRNA-Ser(UCU,G26A)	YML028W	TSA1		1.26348	0.042	1.22809	0.001	0.03567	0.042	1e-05
tRNA-Ser(UCU,G26A)	YDR339C	FCF1	fcf1-ph	0.96442	0.032	0.92961	0.007	0.03583	0.032	0.00037	status=JK
tRNA-Ser(UCU,G26A)	YPL204W	HRR25	hrr25-ph	0.96655	0.056	0.93568	0.042	0.03587	0.056	5e-05
tRNA-Ser(UCU,G26A)	YJR112W	NNF1	nnf1-48	1.2871	0.035	1.26214	0.034	0.03602	0.035	1e-05
tRNA-Ser(UCU,G26A)	YBL034C	STU1	stu1-12	1.02353	0.006	0.98287	0.035	0.03608	0.006	1e-05	status=JK
tRNA-Ser(UCU,G26A)	YBR029C	CDS1	cds1-ph	1.08547	0.031	1.04847	0.035	0.03664	0.031	1e-05
tRNA-Ser(UCU,G26A)	YGR172C	YIP1	yip1-ph	0.25138	0.04	0.21965	0.043	0.03727	0.04	0.0082	status=JK
tRNA-Ser(UCU,G26A)	YDL098C	SNU23	snu23-ph	0.98569	0.045	0.95481	0.049	0.03753	0.045	3e-05
tRNA-Ser(UCU,G26A)	YHR170W	NMD3	nmd3-4	1.05376	0.055	1.01352	0.003	0.03789	0.055	4e-05
tRNA-Ser(UCU,G26A)	YNR035C	ARC35	arc35-6	1.162	0.013	1.11464	0.042	0.03789	0.013	4e-05	status=JK
tRNA-Ser(UCU,G26A)	YLR268W	SEC22	sec22-3	0.93547	0.052	0.90333	0.047	0.03841	0.052	5e-05
tRNA-Ser(UCU,G26A)	YLR145W	RMP1	rmp1-ts	0.82685	0.16	0.79163	0.021	0.03846	0.16	0.00193
tRNA-Ser(UCU,G26A)	YNL102W	POL1	pol1-1	1.08591	0.067	1.0589	0.037	0.03858	0.067	6e-05
tRNA-Ser(UCU,G26A)	YJR076C	CDC11	cdc11-3	1.31799	0.069	1.27131	0.095	0.03867	0.069	4e-05
tRNA-Ser(UCU,G26A)	YKL196C	YKT6	ykt6-ph	1.02567	0.019	0.99597	0.052	0.03871	0.019	0.00011	status=JK
tRNA-Ser(UCU,G26A)	YJR093C	FIP1	fip1-ph	0.89427	0.019	0.86531	0.039	0.03871	0.019	0
tRNA-Ser(UCU,G26A)	YHR166C	CDC23	cdc23-4	1.10653	0.073	1.06613	0.025	0.03906	0.073	8e-05
tRNA-Ser(UCU,G26A)	YIR005W	IST3		1.10233	0.015	1.06992	0.029	0.03909	0.015	6e-05	status=JK
tRNA-Ser(UCU,G26A)	YDR496C	PUF6		0.95922	0.071	0.92369	0.042	0.03924	0.071	0.00011
tRNA-Ser(UCU,G26A)	YBR102C	EXO84	exo84-102	0.97222	0.094	0.92786	0.045	0.03951	0.094	0.00025
tRNA-Ser(UCU,G26A)	YCL052C	PBN1	pbn1-ph	1.05435	0.066	1.01456	0.013	0.03967	0.066	7e-05
tRNA-Ser(UCU,G26A)	YDR182W	CDC1	cdc1-1	0.30835	0.09	0.27175	0.057	0.04027	0.09	0.0064
tRNA-Ser(UCU,G26A)	YPL055C	LGE1		1.121	0.07	1.0795	0.004	0.04135	0.07	7e-05
tRNA-Ser(UCU,G26A)	YGR195W	SKI6	ski6-ph	1.03218	0.051	0.99709	0.022	0.04153	0.051	3e-05
tRNA-Ser(UCU,G26A)	YBR254C	TRS20	trs20-ph	0.8767	0.026	0.83501	0.019	0.04197	0.026	1e-05
tRNA-Ser(UCU,G26A)	YPL010W	RET3	ret3-1	1.24027	0.058	1.18473	0.046	0.04211	0.058	0.00072	status=JK
tRNA-Ser(UCU,G26A)	YIL084C	SDS3		1.10339	0.03	1.05119	0.038	0.04238	0.03	1e-05
tRNA-Ser(UCU,G26A)	YLR033W	RSC58	rsc58-ph	1.02728	0.013	0.97811	0.025	0.04266	0.013	0
tRNA-Ser(UCU,G26A)	YDR238C	SEC26	sec26-11d26	1.2203	0.017	1.17183	0.027	0.0428	0.017	7e-05	status=JK
tRNA-Ser(UCU,G26A)	YMR197C	VTI1	vti1-2	1.0634	0.061	1.01998	0.053	0.0429	0.061	5e-05
tRNA-Ser(UCU,G26A)	YDL017W	CDC7	cdc7-4	1.27337	0.006	1.22452	0.003	0.0433	0.006	1e-05	status=JK
tRNA-Ser(UCU,G26A)	YDR361C	BCP1	bcp1-ts	0.83593	0.007	0.78967	0.033	0.04334	0.007	0
tRNA-Ser(UCU,G26A)	YJL136C	RPS21B		1.02059	0.06	0.97743	0.02	0.0436	0.06	6e-05
tRNA-Ser(UCU,G26A)	YNL118C	DCP2	dcp2-7	0.88814	0.136	0.83291	0.184	0.04405	0.136	0.00097
tRNA-Ser(UCU,G26A)	YJL005W	CYR1	cdc35-1	1.13529	0.068	1.08784	0.031	0.04454	0.068	6e-05
tRNA-Ser(UCU,G26A)	YMR190C	SGS1		1.13532	0.047	1.09767	0.021	0.04465	0.047	2e-05
tRNA-Ser(UCU,G26A)	YOR294W	RRS1	rrs1-124	1.12207	0.038	1.08105	0.01	0.04472	0.038	1e-05
tRNA-Ser(UCU,G26A)	YMR272C	SCS7		0.72073	0.044	0.68319	0.044	0.04475	0.044	6e-05
tRNA-Ser(UCU,G26A)	YHR058C	MED6	med6-ph	0.82508	0.015	0.7838	0.027	0.0456	0.015	0.00012	status=JK
tRNA-Ser(UCU,G26A)	YKL144C	RPC25	rpc25-ph	1.01545	0.071	0.96975	0.015	0.04564	0.071	9e-05
tRNA-Ser(UCU,G26A)	YCL032W	STE50		1.07807	0.032	1.03491	0.037	0.04575	0.032	1e-05
tRNA-Ser(UCU,G26A)	YKL052C	ASK1	ask1-2	1.19602	0.037	1.14705	0.013	0.04599	0.037	1e-05
tRNA-Ser(UCU,G26A)	YMR033W	ARP9	arp9-1	1.0111	0.024	0.96184	0.025	0.04635	0.024	0
tRNA-Ser(UCU,G26A)	YOR070C	GYP1		1.02427	0.049	0.96979	0.047	0.04642	0.049	3e-05
tRNA-Ser(UCU,G26A)	YDR127W	ARO1		1.00495	0.059	0.96027	0.026	0.04734	0.059	6e-05
tRNA-Ser(UCU,G26A)	YER083C	GET2		1.08925	0.006	1.03597	0.042	0.04743	0.006	1e-05	status=JK
tRNA-Ser(UCU,G26A)	YML098W	TAF13	taf13-1	1.05019	0.063	1.00324	0.033	0.04765	0.063	6e-05
tRNA-Ser(UCU,G26A)	YIL048W	NEO1	neo1-2	1.18071	0.037	1.13342	0.001	0.04803	0.037	1e-05
tRNA-Ser(UCU,G26A)	YGL113W	SLD3	sld3-ph	1.08052	0.015	1.03208	0.002	0.04829	0.015	7e-05	status=JK
tRNA-Ser(UCU,G26A)	YGR270W	YTA7		0.89772	0.01	0.85955	0.039	0.04838	0.01	4e-05	status=JK
tRNA-Ser(UCU,G26A)	YBR057C	MUM2		1.17159	0.029	1.12379	0.008	0.04855	0.029	0
tRNA-Ser(UCU,G26A)	YKL045W	PRI2	pri2-1	1.10816	0.041	1.0607	0.011	0.04867	0.041	1e-05
tRNA-Ser(UCU,G26A)	YLR440C	SEC39	sec39-2	1.17527	0.033	1.12233	0.042	0.04895	0.033	1e-05
tRNA-Ser(UCU,G26A)	YAL034W-A	MTW1	mtw1-ts	1.16608	0.164	1.11217	0.103	0.04932	0.164	0.00076
tRNA-Ser(UCU,G26A)	YDL033C	SLM3		1.13591	0.002	1.09775	0.048	0.04944	0.002	0	status=JK
tRNA-Ser(UCU,G26A)	YDR052C	DBF4	dbf4-1	1.02386	0.011	0.98127	0.031	0.04972	0.011	4e-05	status=JK
tRNA-Ser(UCU,G26A)	YNR051C	BRE5		1.00469	0.007	0.94889	0.024	0.04972	0.007	1e-05	status=JK
tRNA-Ser(UCU,G26A)	YPR082C	DIB1	ypr082c-ph	1.08599	0.05	1.0361	0.003	0.04988	0.05	3e-05
tRNA-Ser(UCU,G26A)	YDR158W	HOM2		1.11843	0.135	1.06057	0.02	0.04994	0.134	0.00047
tRNA-Ser(UCU,G26A)	YDR145W	TAF12	taf12-ts23	0.99687	0.035	0.94444	0.013	0.05017	0.035	1e-05
tRNA-Ser(UCU,G26A)	YER148W	SPT15	spt15-i143n	0.84409	0.068	0.77055	0.153	0.05023	0.068	0.00014
tRNA-Ser(UCU,G26A)	YDR454C	GUK1	guk1-ph	0.73314	0.01	0.65736	0.084	0.05031	0.01	6e-05	status=JK
tRNA-Ser(UCU,G26A)	YGR081C	SLX9		1.06107	0.043	1.01805	0.046	0.05039	0.043	2e-05
tRNA-Ser(UCU,G26A)	YKL028W	TFA1	tfa1-21	1.16631	0.047	1.11145	0.004	0.05068	0.047	2e-05
tRNA-Ser(UCU,G26A)	YFL017C	GNA1	gna1-ts	0.43438	0.04	0.37862	0.03	0.05074	0.04	0.00022
tRNA-Ser(UCU,G26A)	YGL065C	ALG2	alg2-1	1.19528	0.013	1.14989	0.059	0.05079	0.013	4e-05	status=JK
tRNA-Ser(UCU,G26A)	YDR328C	SKP1	skp1-3	1.12266	0.028	1.07137	0.066	0.05123	0.028	0.00021	status=JK
tRNA-Ser(UCU,G26A)	YNL126W	SPC98	spc98-ph	1.22148	0.034	1.144	0.064	0.05297	0.034	1e-05
tRNA-Ser(UCU,G26A)	YDR126W	SWF1		1.03113	0.014	0.9733	0.053	0.05305	0.014	6e-05	status=JK
tRNA-Ser(UCU,G26A)	YGL219C	MDM34		1.03929	0.031	0.98743	0.04	0.05313	0.031	1e-05
tRNA-Ser(UCU,G26A)	YKL193C	SDS22	sds22-6	1.15285	0.04	1.09755	0.064	0.05319	0.04	1e-05
tRNA-Ser(UCU,G26A)	YKL197C	PEX1		1.03561	0.02	0.97908	0.023	0.05348	0.02	0
tRNA-Ser(UCU,G26A)	YDR288W	NSE3	nse3-ts3	0.92189	0.036	0.8662	0.015	0.05447	0.036	2e-05
tRNA-Ser(UCU,G26A)	YDR531W	CAB1	cab1-ph	0.88229	0.023	0.82673	0.045	0.0546	0.023	1e-05
tRNA-Ser(UCU,G26A)	YPL235W	RVB2	rvb2-ph	1.18362	0.054	1.12816	0.029	0.05463	0.054	3e-05
tRNA-Ser(UCU,G26A)	YNR003C	RPC34	rpc34-1	0.70081	0.076	0.64706	0.037	0.05511	0.076	0.00035
tRNA-Ser(UCU,G26A)	YDR118W	APC4	apc4-ph	1.16437	0.01	1.10875	0.023	0.05562	0.01	2e-05	status=JK
tRNA-Ser(UCU,G26A)	YOR122C	PFY1	pfy1-13	0.98742	0.022	0.93154	0.008	0.05581	0.022	0
tRNA-Ser(UCU,G26A)	YLR291C	GCD7	gcd7-ph	1.18312	0.037	1.12151	0.034	0.05595	0.037	1e-05
tRNA-Ser(UCU,G26A)	YML098W	TAF13	taf13-2	0.9351	0.068	0.87878	0.003	0.05649	0.068	0.0001
tRNA-Ser(UCU,G26A)	YPL128C	TBF1	tbf1-ph	1.0194	0.045	0.94916	0.058	0.05736	0.045	2e-05
tRNA-Ser(UCU,G26A)	YKL165C	MCD4	mcd4-174	1.08696	0.087	1.02937	0.076	0.05746	0.087	0.00014
tRNA-Ser(UCU,G26A)	YMR094W	CTF13	ctf13-30	1.28387	0.017	1.22624	0.016	0.05758	0.017	6e-05	status=JK
tRNA-Ser(UCU,G26A)	YJR006W	POL31	pol31-ph	1.20901	0.107	1.15493	0.045	0.05797	0.107	0.00019
tRNA-Ser(UCU,G26A)	YNL138W	SRV2	srv2-2	0.7762	0.033	0.72056	0.005	0.05866	0.033	2e-05
tRNA-Ser(UCU,G26A)	YBR175W	SWD3		0.90732	0.02	0.85402	0.03	0.0587	0.02	0.00017	status=JK
tRNA-Ser(UCU,G26A)	YIL109C	SEC24	sec24-2	1.1674	0.025	1.10159	0.021	0.05883	0.025	0
tRNA-Ser(UCU,G26A)	YGR172C	YIP1	yip1-40	1.29872	0.004	1.23952	0.023	0.05927	0.004	0	status=JK
tRNA-Ser(UCU,G26A)	YGL047W	ALG13	alg13-ph	1.25369	0.022	1.20388	0.035	0.05928	0.022	0
tRNA-Ser(UCU,G26A)	YOL018C	TLG2		0.68799	0.008	0.63588	0.029	0.06084	0.008	5e-05	status=JK
tRNA-Ser(UCU,G26A)	YDR280W	RRP45	rrp45-ph	1.40773	0.112	1.33966	0.093	0.0611	0.111	0.00014
tRNA-Ser(UCU,G26A)	YLL050C	COF1	cof1-5	1.18011	0.103	1.11438	0.028	0.06133	0.103	0.00018
tRNA-Ser(UCU,G26A)	YMR076C	PDS5	pds5-1	1.01843	0.052	0.95724	0.001	0.06151	0.052	4e-05
tRNA-Ser(UCU,G26A)	YNL102W	POL1	pol1-12	1.18383	0.059	1.10998	0.015	0.06193	0.059	3e-05
tRNA-Ser(UCU,G26A)	YHR088W	RPF1	rpf1-1	1.07362	0.104	0.99525	0.054	0.06231	0.104	0.00025
tRNA-Ser(UCU,G26A)	YIL118W	RHO3	rho3-ser228	1.03533	0.029	0.96487	0.03	0.06246	0.029	1e-05
tRNA-Ser(UCU,G26A)	YLR029C	RPL15A	ylr029c-ph	1.01775	0.041	0.95829	0.026	0.0625	0.041	2e-05
tRNA-Ser(UCU,G26A)	YKL210W	UBA1	uba1-1	1.20618	0.011	1.13969	0.031	0.06255	0.011	3e-05	status=JK
tRNA-Ser(UCU,G26A)	YGR113W	DAM1	dam1-19	0.96712	0.078	0.89813	0.064	0.06331	0.078	0.00014
tRNA-Ser(UCU,G26A)	YNL064C	YDJ1		1.16131	0.106	1.09589	0.09	0.06333	0.106	0.00021
tRNA-Ser(UCU,G26A)	YJR141W	YJR141W	yjr141w-ph	0.87661	0.022	0.80934	0.003	0.06492	0.022	0
tRNA-Ser(UCU,G26A)	YCL010C	SGF29		1.11061	0.03	1.04618	0.012	0.06525	0.03	1e-05
tRNA-Ser(UCU,G26A)	YDR150W	NUM1		1.37677	0.018	1.30656	0.01	0.06591	0.018	6e-05	status=JK
tRNA-Ser(UCU,G26A)	YOL144W	NOP8	nop8-101	1.07322	0.034	1.00264	0.009	0.0661	0.034	1e-05
tRNA-Ser(UCU,G26A)	YMR304W	UBP15		1.2735	0.043	1.20936	0.005	0.06724	0.043	1e-05
tRNA-Ser(UCU,G26A)	YHR036W	BRL1	brl1-c371s	1.25397	0.064	1.18676	0.002	0.06729	0.064	4e-05
tRNA-Ser(UCU,G26A)	YOR074C	CDC21	cdc21-ts	1.23567	0.012	1.1694	0.012	0.06734	0.012	0
tRNA-Ser(UCU,G26A)	YFL039C	ACT1	act1-119	1.19359	0.022	1.12475	0.019	0.06769	0.022	0
tRNA-Ser(UCU,G26A)	YMR227C	TAF7	taf7-ts1	0.97613	0.171	0.895	0.156	0.06773	0.171	0.00144
tRNA-Ser(UCU,G26A)	YPL063W	TIM50	tim50-ph	1.12634	0.18	1.08299	0.088	0.06792	0.18	0.0011
tRNA-Ser(UCU,G26A)	YNL079C	TPM1		0.99227	0.089	0.92454	0.01	0.06827	0.089	0.0002
tRNA-Ser(UCU,G26A)	YHR058C	MED6	med6-ts	0.52726	0.007	0.46318	0.015	0.06839	0.007	5e-05	status=JK
tRNA-Ser(UCU,G26A)	YDR164C	SEC1	sec1-1	1.22732	0.017	1.15643	0.022	0.06867	0.017	7e-05	status=JK
tRNA-Ser(UCU,G26A)	YOR249C	APC5	apc5-ca	1.16543	0.066	1.10054	0.014	0.06869	0.066	5e-05
tRNA-Ser(UCU,G26A)	YBR109C	CMD1	cmd1-3	0.49327	0.093	0.40464	0.099	0.06896	0.093	0.00179
tRNA-Ser(UCU,G26A)	YKL213C	DOA1		1.23248	0.002	1.15553	0.034	0.0694	0.002	0	status=JK
tRNA-Ser(UCU,G26A)	YPL076W	GPI2	gpi2-1-7b	0.98234	0.129	0.91034	0.061	0.06951	0.129	0.00062
tRNA-Ser(UCU,G26A)	YLR393W	ATP10		0.73262	0.132	0.64496	0.147	0.06953	0.132	0.00157
tRNA-Ser(UCU,G26A)	YMR005W	TAF4	taf4-18	0.71939	0.037	0.62922	0.127	0.07105	0.037	4e-05
tRNA-Ser(UCU,G26A)	YDR188W	CCT6	cct6-18	0.99274	0.056	0.92222	0.001	0.07115	0.056	5e-05
tRNA-Ser(UCU,G26A)	YMR198W	CIK1		1.17029	0.007	1.10629	0.016	0.07126	0.007	1e-05	status=JK
tRNA-Ser(UCU,G26A)	YLR347C	KAP95	kap95-e126k	1.17904	0.063	1.10979	0.018	0.07152	0.063	4e-05
tRNA-Ser(UCU,G26A)	YML069W	POB3	pob3-l78r	0.62808	0.359	0.55928	0.033	0.07187	0.359	0.03956
tRNA-Ser(UCU,G26A)	YOR335C	ALA1	ala1-1	0.9958	0.029	0.93488	0.089	0.07218	0.029	1e-05
tRNA-Ser(UCU,G26A)	YIL022W	TIM44	tim44-8	1.15481	0.051	1.08398	0.046	0.07362	0.051	2e-05
tRNA-Ser(UCU,G26A)	YDR228C	PCF11	pcf11-2	1.06046	0.046	0.99111	0.044	0.07388	0.046	2e-05
tRNA-Ser(UCU,G26A)	YLR218C	COA4		1.02305	0.049	0.94771	0.021	0.07398	0.049	3e-05
tRNA-Ser(UCU,G26A)	YMR296C	LCB1	lcb1-10	0.42896	0.011	0.38354	0.14	0.07423	0.011	0.00023	status=JK
tRNA-Ser(UCU,G26A)	YDR196C	CAB5	cab5-1	1.24307	0.027	1.17111	0.026	0.07425	0.027	0
tRNA-Ser(UCU,G26A)	YMR123W	PKR1		1.01591	0.138	0.95275	0.084	0.07459	0.138	0.00068
tRNA-Ser(UCU,G26A)	YPL028W	ERG10	erg10-1	1.01029	0.009	0.93063	0.02	0.07461	0.009	3e-05	status=JK
tRNA-Ser(UCU,G26A)	YFL034C-B	MOB2	mob2-20	1.02344	0.115	0.94653	0.08	0.07557	0.114	0.00038
tRNA-Ser(UCU,G26A)	YBR196C	PGI1	pgi1-2	1.24902	0.008	1.14403	0.096	0.07581	0.008	2e-05	status=JK
tRNA-Ser(UCU,G26A)	YKL024C	URA6	ura6-4	1.11742	0.081	1.04174	0.041	0.076	0.081	0.00011
tRNA-Ser(UCU,G26A)	YBR126C	TPS1		1.1223	0.088	1.03457	0.071	0.07601	0.088	0.00013
tRNA-Ser(UCU,G26A)	YDR050C	TPI1	tpi1-1670	1.30924	0.05	1.23217	0.022	0.07675	0.05	2e-05
tRNA-Ser(UCU,G26A)	YGL247W	BRR6	brr6-ph	1.21632	0.146	1.13997	0.096	0.07693	0.146	0.00047
tRNA-Ser(UCU,G26A)	YHR178W	STB5		0.9741	0.039	0.88623	0.03	0.07714	0.039	2e-05
tRNA-Ser(UCU,G26A)	YBL105C	PKC1	pkc1-3	1.14149	0.001	1.05985	0.024	0.07751	0.001	0	status=JK
tRNA-Ser(UCU,G26A)	YBR135W	CKS1	cks1-35	1.03645	0.011	0.95543	0.022	0.07802	0.011	0
tRNA-Ser(UCU,G26A)	YML130C	ERO1	ero1-1	1.07526	0.147	1.02266	0.096	0.07837	0.147	0.00069
tRNA-Ser(UCU,G26A)	YAL041W	CDC24	cdc24-2	1.3075	0.025	1.23429	0.009	0.07874	0.025	0
tRNA-Ser(UCU,G26A)	YBL026W	LSM2	lsm2-ph	1.26704	0.054	1.18846	0.017	0.07902	0.054	2e-05
tRNA-Ser(UCU,G26A)	YKL113C	RAD27		1.04307	0.017	0.96137	0.035	0.07905	0.017	9e-05	status=JK
tRNA-Ser(UCU,G26A)	YKL069W	YKL069W		1.08299	0.068	1.00888	0.032	0.07906	0.068	7e-05
tRNA-Ser(UCU,G26A)	YLL036C	PRP19	prp19-1	0.96678	0.044	0.84788	0.137	0.07988	0.044	0.0007	status=JK
tRNA-Ser(UCU,G26A)	YOR057W	SGT1	sgt1-3	1.11801	0.043	1.03891	0.023	0.08004	0.043	2e-05
tRNA-Ser(UCU,G26A)	YDR243C	PRP28	prp28-101	1.25998	0.076	1.17954	0.015	0.08025	0.076	6e-05
tRNA-Ser(UCU,G26A)	YMR100W	MUB1		1.21013	0.015	1.13353	0.02	0.08049	0.015	0
tRNA-Ser(UCU,G26A)	YKL173W	SNU114	snu114-60	1.34491	0.041	1.25862	0.017	0.08066	0.041	1e-05
tRNA-Ser(UCU,G26A)	YDL014W	NOP1	nop1-3	1.3594	0.036	1.2682	0.034	0.08143	0.036	1e-05
tRNA-Ser(UCU,G26A)	YGR277C	CAB4	cab4-ph	0.95831	0.024	0.87948	0.035	0.08195	0.024	0.0002	status=JK
tRNA-Ser(UCU,G26A)	YDR088C	SLU7	slu7-ts2	0.44357	0.13	0.35998	0.006	0.08207	0.13	0.00644
tRNA-Ser(UCU,G26A)	YGL022W	STT3	stt3-2	1.05371	0.085	0.96287	0.063	0.0825	0.085	0.00015
tRNA-Ser(UCU,G26A)	YAL041W	CDC24	cdc24-1	1.11379	0.022	1.03093	0.041	0.0826	0.022	0.00013	status=JK
tRNA-Ser(UCU,G26A)	YJL011C	RPC17	yjl011c-ph	1.06264	0.004	0.98411	0.017	0.08316	0.004	1e-05	status=JK
tRNA-Ser(UCU,G26A)	YIL118W	RHO3	rho3-1	1.09667	0.03	1.0098	0.011	0.08334	0.03	1e-05
tRNA-Ser(UCU,G26A)	YKL004W	AUR1	ykl004w-ph	1.32802	0.016	1.23941	0.046	0.0834	0.016	5e-05	status=JK
tRNA-Ser(UCU,G26A)	YLR045C	STU2	stu2-12	1.4406	0.051	1.35738	0.009	0.08359	0.051	1e-05
tRNA-Ser(UCU,G26A)	YBL034C	STU1	stu1-5	1.27811	0.046	1.19296	0.066	0.08476	0.046	1e-05
tRNA-Ser(UCU,G26A)	YDR434W	GPI17	gpi17-ph	1.25458	0.026	1.16784	0.022	0.08625	0.026	0
tRNA-Ser(UCU,G26A)	YBL076C	ILS1	ils1-1	1.0024	0.052	0.91899	0.042	0.08635	0.052	4e-05
tRNA-Ser(UCU,G26A)	YPL255W	BBP1	bbp1-1	1.21594	0.032	1.13012	0.016	0.08662	0.032	1e-05
tRNA-Ser(UCU,G26A)	YPR018W	RLF2		1.21819	0.056	1.1268	0.017	0.08663	0.056	3e-05
tRNA-Ser(UCU,G26A)	YKL176C	LST4		1.10087	0.163	1.00995	0.016	0.08742	0.163	0.00087
tRNA-Ser(UCU,G26A)	YBR154C	RPB5	rpb5-h147r	1.22526	0.118	1.13399	0.018	0.0878	0.118	0.00024
tRNA-Ser(UCU,G26A)	YIR010W	DSN1	dsn1-8	1.13149	0.029	1.04498	0.018	0.08814	0.029	0
tRNA-Ser(UCU,G26A)	YPR088C	SRP54	ypr088c-ph	1.28356	0.079	1.19455	0.012	0.08815	0.079	6e-05
tRNA-Ser(UCU,G26A)	YGL245W	GUS1	gus1-ph	1.20791	0.027	1.12212	0.009	0.08826	0.027	0
tRNA-Ser(UCU,G26A)	YNL001W	DOM34		1.15308	0.044	1.06772	0.037	0.08851	0.044	2e-05
tRNA-Ser(UCU,G26A)	YLR022C	SDO1	sdo1-vma1-ts	1.14801	0.018	1.06373	0.017	0.08861	0.018	0
tRNA-Ser(UCU,G26A)	YLR032W	RAD5		1.08643	0.007	0.9998	0.022	0.08929	0.007	1e-05	status=JK
tRNA-Ser(UCU,G26A)	YLR088W	GAA1	gaa1-ts	1.3514	0.042	1.26531	0.037	0.08962	0.042	1e-05
tRNA-Ser(UCU,G26A)	YJL168C	SET2		1.035	0.007	0.94391	0.019	0.08986	0.007	1e-05	status=JK
tRNA-Ser(UCU,G26A)	YML081C-A	ATP18		1.08494	0.182	1.00574	0.07	0.09007	0.182	0.00127
tRNA-Ser(UCU,G26A)	YFL039C	ACT1	act1-120	0.95892	0.036	0.87144	0.033	0.09023	0.036	1e-05
tRNA-Ser(UCU,G26A)	YNL062C	GCD10	gcd10-506	1.26817	0.04	1.17155	0.02	0.09035	0.04	1e-05
tRNA-Ser(UCU,G26A)	YFL039C	ACT1	act1-129	1.07548	0.148	0.96059	0.118	0.09037	0.148	0.00071
tRNA-Ser(UCU,G26A)	YFL039C	ACT1	act1-105	1.03208	0.012	0.94282	0.029	0.09075	0.012	0
tRNA-Ser(UCU,G26A)	YER168C	CCA1	cca1-ph	0.74979	0.068	0.66917	0.042	0.09106	0.068	0.0002
tRNA-Ser(UCU,G26A)	YPL101W	ELP4		1.11044	0.038	1.02339	0.036	0.09183	0.038	1e-05
tRNA-Ser(UCU,G26A)	YGR246C	BRF1	brf1-w107r	0.19691	0.095	0.09918	0.04	0.09275	0.095	0.02567
tRNA-Ser(UCU,G26A)	YBR131W	CCZ1		0.9595	0.005	0.86774	0.013	0.09289	0.005	1e-05	status=JK
tRNA-Ser(UCU,G26A)	YOR149C	SMP3	smp3-2	1.167	0.006	1.0746	0.031	0.09301	0.006	1e-05	status=JK
tRNA-Ser(UCU,G26A)	YIL083C	CAB2	yil083c-ph	1.2362	0.026	1.14461	0.028	0.09337	0.026	0
tRNA-Ser(UCU,G26A)	YDL065C	PEX19		1.28904	0.061	1.18047	0.039	0.09355	0.061	3e-05
tRNA-Ser(UCU,G26A)	YOR194C	TOA1	toa1-ph	0.82509	0.042	0.73147	0.08	0.09456	0.042	0.00088	status=JK
tRNA-Ser(UCU,G26A)	YDL028C	MPS1	mps1-417	1.11346	0.024	1.01949	0.007	0.09493	0.024	0
tRNA-Ser(UCU,G26A)	YPL101W	ELP4		1.00221	0.099	0.90866	0.06	0.09494	0.099	0.00026
tRNA-Ser(UCU,G26A)	YJL097W	PHS1	phs1-1	1.31618	0.023	1.21791	0.058	0.09523	0.023	0
tRNA-Ser(UCU,G26A)	YGL073W	HSF1	hsf1-848	1.21903	0.071	1.11973	0.02	0.09555	0.071	5e-05
tRNA-Ser(UCU,G26A)	YML023C	NSE5	nse5-ts2	1.15413	0.148	1.06283	0.009	0.0956	0.148	0.00057
tRNA-Ser(UCU,G26A)	YKL074C	MUD2		1.20626	0.04	1.11365	0.047	0.09588	0.04	1e-05
tRNA-Ser(UCU,G26A)	YLL038C	ENT4		1.11766	0.027	1.02128	0.015	0.09595	0.027	0
tRNA-Ser(UCU,G26A)	YDR002W	YRB1	yrb1-51	1.22246	0.041	1.1306	0.019	0.0967	0.041	1e-05
tRNA-Ser(UCU,G26A)	YHR129C	ARP1		1.22824	0.118	1.12775	0.032	0.09688	0.118	0.00024
tRNA-Ser(UCU,G26A)	YKL112W	ABF1	abf1-102	1.11511	0.006	1.01848	0.014	0.09752	0.006	1e-05	status=JK
tRNA-Ser(UCU,G26A)	YFL034C-B	MOB2	mob2-24	0.97255	0.047	0.87449	0.003	0.0977	0.047	3e-05
tRNA-Ser(UCU,G26A)	YGR140W	CBF2	cbf2-2	1.22779	0.039	1.12733	0.028	0.09809	0.039	1e-05
tRNA-Ser(UCU,G26A)	YJR074W	MOG1		1.25903	0.031	1.1502	0.029	0.09867	0.031	0
tRNA-Ser(UCU,G26A)	YOR326W	MYO2	myo2-16	1.42867	0.194	1.32994	0.011	0.09897	0.194	0.00068
tRNA-Ser(UCU,G26A)	YDR362C	TFC6	tfc6-m1	1.33399	0.013	1.2323	0.006	0.09898	0.013	3e-05	status=JK
tRNA-Ser(UCU,G26A)	YBR237W	PRP5	prp5-1	1.04819	0.138	0.94734	0.031	0.09911	0.138	0.00062
tRNA-Ser(UCU,G26A)	YMR239C	RNT1	rnt1-ts	1.39146	0.044	1.28065	0.049	0.09981	0.044	1e-05
tRNA-Ser(UCU,G26A)	YLL031C	GPI13	gpi13-5	1.17315	0.017	1.07695	0.031	0.10017	0.017	7e-05	status=JK
tRNA-Ser(UCU,G26A)	YDR334W	SWR1		1.1217	0.126	1.02025	0.002	0.1002	0.126	0.00038
tRNA-Ser(UCU,G26A)	YGL142C	GPI10	gpi10-ph	1.08028	0.062	0.97276	0.035	0.10024	0.062	5e-05
tRNA-Ser(UCU,G26A)	YLR089C	ALT1		1.03479	0.026	0.94346	0.049	0.10026	0.026	0
tRNA-Ser(UCU,G26A)	YBR152W	SPP381	spp381-ph	1.14065	0.039	1.04323	0.017	0.10054	0.039	1e-05
tRNA-Ser(UCU,G26A)	YOR370C	MRS6	mrs6-2	1.25059	0.02	1.15925	0.059	0.10055	0.02	0
tRNA-Ser(UCU,G26A)	YKR083C	DAD2	dad2-9	1.2777	0.03	1.18087	0.007	0.10131	0.03	0
tRNA-Ser(UCU,G26A)	YDL103C	QRI1	qri1-ph	0.40842	0.224	0.35654	0.181	0.10151	0.224	0.03565
tRNA-Ser(UCU,G26A)	YMR296C	LCB1	lcb1-2	0.56456	0.221	0.45238	0.076	0.10161	0.221	0.01457
tRNA-Ser(UCU,G26A)	YLR314C	CDC3	cdc3-1	1.27738	0.052	1.17078	0.054	0.10257	0.052	2e-05
tRNA-Ser(UCU,G26A)	YGL174W	BUD13		1.14306	0.035	1.04174	0.018	0.1031	0.035	1e-05
tRNA-Ser(UCU,G26A)	YDL087C	LUC7	luc7-1	1.28157	0.069	1.17501	0.013	0.10315	0.069	4e-05
tRNA-Ser(UCU,G26A)	YKL208W	CBT1		1.20228	0.109	1.09864	0.057	0.10357	0.109	0.0002
tRNA-Ser(UCU,G26A)	YGL130W	CEG1	ceg1-34	1.08207	0.006	0.97914	0.023	0.1042	0.006	0
tRNA-Ser(UCU,G26A)	YJR112W	NNF1	nnf1-17	1.2194	0.043	1.1195	0.035	0.10476	0.043	1e-05
tRNA-Ser(UCU,G26A)	YJR064W	CCT5	yjr064w-ph	1.15319	0.039	1.05054	0.033	0.105	0.039	1e-05
tRNA-Ser(UCU,G26A)	YDR373W	FRQ1	frq1-1	1.21023	0.051	1.10244	0.009	0.10558	0.051	2e-05
tRNA-Ser(UCU,G26A)	YLR319C	BUD6		1.2515	0.023	1.14772	0.025	0.10579	0.023	0
tRNA-Ser(UCU,G26A)	YGL098W	USE1	use1-ts	1.30832	0.17	1.2055	0.042	0.10628	0.17	0.00059
tRNA-Ser(UCU,G26A)	YMR200W	ROT1	rot1-ph	1.12443	0.059	1.00734	0.025	0.10631	0.059	4e-05
tRNA-Ser(UCU,G26A)	YOL001W	PHO80		1.30813	0.014	1.20834	0.023	0.10663	0.014	4e-05	status=JK
tRNA-Ser(UCU,G26A)	YKL049C	CSE4	cse4-1	1.25379	0.058	1.14283	0.042	0.10689	0.058	3e-05
tRNA-Ser(UCU,G26A)	YPR103W	PRE2	pre2-127	1.14334	0.005	1.03978	0.028	0.10725	0.005	1e-05	status=JK
tRNA-Ser(UCU,G26A)	YMR239C	RNT1	rnt1-47	1.1675	0.023	1.05666	0.002	0.10751	0.023	0
tRNA-Ser(UCU,G26A)	YDR045C	RPC11	rpc11-ph	1.21114	0.015	1.10385	0.041	0.108	0.015	5e-05	status=JK
tRNA-Ser(UCU,G26A)	YHR111W	UBA4		1.05344	0.005	0.94889	0.014	0.10869	0.005	1e-05	status=JK
tRNA-Ser(UCU,G26A)	YGL112C	TAF6	taf6-ts	0.99427	0.014	0.88332	0.047	0.10881	0.014	6e-05	status=JK
tRNA-Ser(UCU,G26A)	YBR164C	ARL1		1.20107	0.031	1.08891	0.03	0.10894	0.031	0
tRNA-Ser(UCU,G26A)	YPR191W	QCR2		1.1216	0.072	1.01198	0.007	0.10897	0.072	7e-05
tRNA-Ser(UCU,G26A)	YDL007W	RPT2	rpt2-rf	1.1922	0.029	1.08593	0.035	0.10969	0.029	0
tRNA-Ser(UCU,G26A)	YOR224C	RPB8	rpb8-ph	1.11427	0.084	1.012	0.078	0.11042	0.084	0.00012
tRNA-Ser(UCU,G26A)	YLR071C	RGR1	rgr1-100	0.37835	0.072	0.26637	0.005	0.11075	0.072	0.00182
tRNA-Ser(UCU,G26A)	YER083C	GET2		1.2278	0.071	1.11686	0.003	0.11119	0.071	5e-05
tRNA-Ser(UCU,G26A)	YMR079W	SEC14	sec14-3	1.11168	0.037	0.99223	0.04	0.11135	0.037	1e-05
tRNA-Ser(UCU,G26A)	YDR293C	SSD1		1.04273	0.004	0.92954	0.004	0.11148	0.004	0	status=JK
tRNA-Ser(UCU,G26A)	YJL025W	RRN7	rrn7-ph	1.01301	0.187	0.87889	0.082	0.11153	0.187	0.0017
tRNA-Ser(UCU,G26A)	YML041C	VPS71		1.04201	0.044	0.93442	0.046	0.11172	0.044	2e-05
tRNA-Ser(UCU,G26A)	YER157W	COG3	cog3-1	0.66362	0.077	0.55775	0.047	0.11243	0.077	0.00043
tRNA-Ser(UCU,G26A)	YMR298W	LIP1	lip1-ph	0.91658	0.083	0.80849	0.031	0.11247	0.083	0.00021
tRNA-Ser(UCU,G26A)	YIL026C	IRR1	irr1-1	1.34354	0.076	1.28954	0.102	0.11247	0.076	5e-05
tRNA-Ser(UCU,G26A)	YGR156W	PTI1	pti1-ts1	1.22246	0.052	1.12917	0.123	0.11372	0.052	2e-05
tRNA-Ser(UCU,G26A)	YNR010W	CSE2		0.74729	0.018	0.63411	0.024	0.11447	0.018	0
tRNA-Ser(UCU,G26A)	YJL072C	PSF2	yjl072c-ph	1.27683	0.065	1.15384	0.038	0.11463	0.065	4e-05
tRNA-Ser(UCU,G26A)	YDR162C	NBP2		1.01814	0.029	0.90244	0.025	0.1154	0.029	1e-05
tRNA-Ser(UCU,G26A)	YER157W	COG3	cog3-2	1.21117	0.047	1.08758	0.049	0.116	0.047	2e-05
tRNA-Ser(UCU,G26A)	YML046W	PRP39	prp39-1	1.273	0.092	1.16311	0.057	0.11627	0.092	0.0001
tRNA-Ser(UCU,G26A)	YBR055C	PRP6	prp6-ts	1.19654	0.081	1.08341	0.035	0.11644	0.081	8e-05
tRNA-Ser(UCU,G26A)	YFL005W	SEC4	sec4-8	1.14439	0.044	1.0364	0.027	0.11669	0.044	2e-05
tRNA-Ser(UCU,G26A)	YLR310C	CDC25	cdc25-2	1.19036	0.067	1.07162	0.014	0.11733	0.067	5e-05
tRNA-Ser(UCU,G26A)	YDR404C	RPB7	ydr404c-ph	0.11788	0.023	0.01412	0.024	0.11783	0.023	0.00193
tRNA-Ser(UCU,G26A)	YLR298C	YHC1	yhc1-1	1.31769	0.062	1.19936	0.037	0.11807	0.062	3e-05
tRNA-Ser(UCU,G26A)	YGL044C	RNA15	rna15-58	1.18295	0.025	1.04319	0.058	0.11844	0.025	0
tRNA-Ser(UCU,G26A)	YOR244W	ESA1	esa1-d414	1.11199	0.045	0.98713	0.037	0.11851	0.045	2e-05
tRNA-Ser(UCU,G26A)	YGR101W	PCP1		0.73277	0.066	0.60835	0.161	0.1192	0.066	0.0002
tRNA-Ser(UCU,G26A)	YGR125W	YGR125W		1.27979	0.058	1.15639	0.083	0.11933	0.058	3e-05
tRNA-Ser(UCU,G26A)	YNL138W	SRV2	srv2-ts	1.13332	0.067	1.01453	0.039	0.11993	0.067	6e-05
tRNA-Ser(UCU,G26A)	YDR052C	DBF4	dbf4-4	1.39282	0.09	1.26155	0.049	0.12054	0.09	8e-05
tRNA-Ser(UCU,G26A)	YGL011C	SCL1	scl1-ph	1.16917	0.096	1.05036	0.007	0.12088	0.096	0.00015
tRNA-Ser(UCU,G26A)	YFL039C	ACT1	act1-124	1.28628	0.026	1.15147	0.062	0.12092	0.026	0
tRNA-Ser(UCU,G26A)	YDR238C	SEC26	sec26-f856aw860a	1.40193	0.085	1.28142	0.008	0.12224	0.085	6e-05
tRNA-Ser(UCU,G26A)	YFL031W	HAC1		0.77246	0.093	0.66262	0.093	0.12245	0.093	0.00048
tRNA-Ser(UCU,G26A)	YGL061C	DUO1	duo1-2	1.31397	0.006	1.18682	0.038	0.1229	0.006	1e-05	status=JK
tRNA-Ser(UCU,G26A)	YLR193C	UPS1		0.88178	0.023	0.76208	0.022	0.12292	0.023	1e-05
tRNA-Ser(UCU,G26A)	YIL109C	SEC24	sec24-20	1.10307	0.086	0.97513	0.023	0.12334	0.086	0.00013
tRNA-Ser(UCU,G26A)	YBR155W	CNS1	cns1-1	0.29817	0.021	0.18441	0.019	0.12338	0.021	0.00162	status=JK
tRNA-Ser(UCU,G26A)	YGL115W	SNF4		1.26491	0.062	1.14322	0.031	0.12363	0.062	3e-05
tRNA-Ser(UCU,G26A)	YOR254C	SEC63	sec63-1	0.96615	0.074	0.83577	0.02	0.12387	0.074	0.00013
tRNA-Ser(UCU,G26A)	YML128C	MSC1		1.00236	0.056	0.87337	0.032	0.12526	0.056	5e-05
tRNA-Ser(UCU,G26A)	YLR457C	NBP1	nbp1-1	1.46276	0.086	1.32659	0.014	0.12559	0.086	6e-05
tRNA-Ser(UCU,G26A)	YGR013W	SNU71	snu71-ph	1.37869	0.024	1.2457	0.027	0.12598	0.024	0
tRNA-Ser(UCU,G26A)	YHR107C	CDC12	cdc12-td	1.26045	0.031	1.13059	0.025	0.12699	0.031	0
tRNA-Ser(UCU,G26A)	YML105C	SEC65	sec65-1	0.97841	0.128	0.858	0.02	0.12706	0.128	0.0006
tRNA-Ser(UCU,G26A)	YLR367W	RPS22B		1.29564	0.007	1.16499	0.017	0.12732	0.007	1e-05	status=JK
tRNA-Ser(UCU,G26A)	YNL006W	LST8	lst8-6	0.57435	0.358	0.45673	0.383	0.12758	0.358	0.04917
tRNA-Ser(UCU,G26A)	YKR020W	VPS51		1.09666	0.075	0.96538	0.031	0.12768	0.075	9e-05
tRNA-Ser(UCU,G26A)	YHR036W	BRL1	brl1-c371r	1.45197	0.002	1.31604	0.026	0.12785	0.002	0	status=JK
tRNA-Ser(UCU,G26A)	YNL147W	LSM7		1.39922	0.075	1.2787	0.052	0.1279	0.075	4e-05
tRNA-Ser(UCU,G26A)	YKL088W	CAB3	cab3-ph	1.28205	0.085	1.15308	0.039	0.12793	0.085	8e-05
tRNA-Ser(UCU,G26A)	YBL105C	PKC1	pkc1-4	0.96215	0.016	0.83592	0.019	0.1283	0.016	0
tRNA-Ser(UCU,G26A)	YBL041W	PRE7	pre7-ph	1.1248	0.004	0.99438	0.004	0.12844	0.004	0	status=JK
tRNA-Ser(UCU,G26A)	YLL031C	GPI13	gpi13-4	0.27995	0.09	0.14091	0.061	0.12853	0.09	0.00837
tRNA-Ser(UCU,G26A)	YMR134W	YMR134W	ymr134w-ph	1.13224	0.03	0.9956	0.019	0.13085	0.03	0.00023	status=JK
tRNA-Ser(UCU,G26A)	YBR082C	UBC4		1.2129	0.067	1.08111	0.032	0.1314	0.067	5e-05
tRNA-Ser(UCU,G26A)	YOR123C	LEO1		1.06435	0.005	0.92852	0.026	0.13193	0.005	1e-05	status=JK
tRNA-Ser(UCU,G26A)	YNR026C	SEC12	sec12-4	1.25815	0.036	1.13118	0.018	0.13204	0.035	1e-05
tRNA-Ser(UCU,G26A)	YPL047W	SGF11		1.18035	0.136	1.03811	0.042	0.13267	0.135	0.00041
tRNA-Ser(UCU,G26A)	YHR058C	MED6	med6-ts	0.52899	0.033	0.40247	0.039	0.13271	0.033	7e-05
tRNA-Ser(UCU,G26A)	YHR030C	SLT2		1.05453	0.145	0.92683	0.037	0.13414	0.145	0	status=JK
tRNA-Ser(UCU,G26A)	YBR221C	PDB1		1.16645	0.011	1.03619	0.019	0.13419	0.011	3e-05	status=JK
tRNA-Ser(UCU,G26A)	YDR212W	TCP1	tcp1-1	1.20859	0.076	1.06898	0.002	0.13517	0.076	7e-05
tRNA-Ser(UCU,G26A)	YLR103C	CDC45	cdc45-27	1.40736	0.029	1.25274	0.088	0.13566	0.029	0.00014	status=JK
tRNA-Ser(UCU,G26A)	YDR212W	TCP1	tcp1-2	1.20583	0.058	1.07896	0.051	0.13584	0.058	3e-05
tRNA-Ser(UCU,G26A)	YBR154C	RPB5	rpb5-ph	1.2896	0.129	1.16033	0.025	0.13662	0.129	0.00027
tRNA-Ser(UCU,G26A)	YBL097W	BRN1	brn1-9	0.42265	0.185	0.28194	0.101	0.13733	0.185	0.01964
tRNA-Ser(UCU,G26A)	YHR036W	BRL1	brl1-3231	1.35518	0.057	1.21277	0.04	0.13748	0.057	2e-05
tRNA-Ser(UCU,G26A)	YCR042C	TAF2	taf2-1	1.18158	0.065	1.04212	0.035	0.13787	0.065	5e-05
tRNA-Ser(UCU,G26A)	YBR160W	CDC28	cdc28-13	1.19202	0.009	1.05484	0.003	0.13875	0.009	2e-05	status=JK
tRNA-Ser(UCU,G26A)	YKR022C	NTR2	ykr022c-ph	1.13259	0.021	0.98759	0.026	0.13929	0.021	0
tRNA-Ser(UCU,G26A)	YFL039C	ACT1	act1-111	1.25542	0.04	1.11681	0.012	0.1393	0.04	1e-05
tRNA-Ser(UCU,G26A)	YKL189W	HYM1	hym1-15	1.40142	0.088	1.26009	0.013	0.13969	0.088	7e-05
tRNA-Ser(UCU,G26A)	YPR110C	RPC40	rpc40-v78r	0.51287	0.111	0.37194	0.06	0.14019	0.111	0.00267
tRNA-Ser(UCU,G26A)	YHR122W	CIA2	yhr122w-ph	1.089	0.167	0.94439	0.026	0.14074	0.167	0.00098
tRNA-Ser(UCU,G26A)	YKL006C-A	SFT1	sft1-15	1.14153	0.068	0.99531	0.058	0.14101	0.068	6e-05
tRNA-Ser(UCU,G26A)	YKR086W	PRP16	prp16-ts	1.17906	0.004	1.03728	0.034	0.14201	0.004	0	status=JK
tRNA-Ser(UCU,G26A)	YHR188C	GPI16	gpi16-ph	1.10416	0.139	0.96706	0.069	0.14213	0.139	0.00054
tRNA-Ser(UCU,G26A)	YKR062W	TFA2	tfa2-45	0.24365	0.084	0.11391	0.133	0.14215	0.084	0.01011
tRNA-Ser(UCU,G26A)	YDR113C	PDS1	pds1-128	1.22521	0.06	1.09232	0.045	0.14243	0.06	3e-05
tRNA-Ser(UCU,G26A)	YOL102C	TPT1	yol102c-ph	0.45869	0.532	0.32867	0.38	0.14273	0.532	0.18313
tRNA-Ser(UCU,G26A)	YIL008W	URM1		1.08977	0.137	0.93883	0.081	0.14401	0.137	0.00054
tRNA-Ser(UCU,G26A)	YDL058W	USO1	uso1-1	1.19596	0.053	1.04677	0.041	0.14421	0.053	2e-05
tRNA-Ser(UCU,G26A)	YFL039C	ACT1	act1-125	1.08964	0.011	0.94722	0.015	0.14728	0.011	3e-05	status=JK
tRNA-Ser(UCU,G26A)	YNR035C	ARC35	arc35-5	1.24361	0.049	1.09085	0.047	0.14754	0.049	2e-05
tRNA-Ser(UCU,G26A)	YGR074W	SMD1	smd1-1	0.40567	0.166	0.27778	0.117	0.14773	0.166	0.01644
tRNA-Ser(UCU,G26A)	YER125W	RSP5	rsp5-3	1.28569	0.078	1.1416	0.074	0.14898	0.078	6e-05
tRNA-Ser(UCU,G26A)	YDL045C	FAD1	fad1-ph	1.201	0.037	1.04417	0.049	0.14941	0.037	1e-05
tRNA-Ser(UCU,G26A)	YGR185C	TYS1	tys1-1	1.17383	0.03	1.01873	0.043	0.15074	0.03	0
tRNA-Ser(UCU,G26A)	YBL034C	STU1	stu1-6	1.27419	0.054	1.11445	0.014	0.15123	0.054	0.00061	status=JK
tRNA-Ser(UCU,G26A)	YDR240C	SNU56	ydr240c-ph	1.25507	0.01	1.10329	0.038	0.15134	0.01	2e-05	status=JK
tRNA-Ser(UCU,G26A)	YLR272C	YCS4	ycs4-1	0.16785	0.159	0.01608	0.016	0.15154	0.159	0.12517
tRNA-Ser(UCU,G26A)	YLR119W	SRN2		1.25709	0.054	1.113	0.064	0.152	0.054	2e-05
tRNA-Ser(UCU,G26A)	YKR099W	BAS1		1.34215	0.044	1.18392	0.022	0.15322	0.044	1e-05
tRNA-Ser(UCU,G26A)	YDL015C	TSC13	tsc13-ph	1.01312	0.091	0.84346	0.076	0.15439	0.091	0.0002
tRNA-Ser(UCU,G26A)	YGL001C	ERG26	erg26-1	1.39742	0.118	1.26535	0.073	0.15538	0.118	0.00017
tRNA-Ser(UCU,G26A)	YKL078W	DHR2	dhr2-ph	1.23065	0.063	1.07181	0.004	0.15601	0.063	4e-05
tRNA-Ser(UCU,G26A)	YOR184W	SER1		1.23628	0.053	1.07945	0.049	0.15681	0.053	2e-05
tRNA-Ser(UCU,G26A)	YDR083W	RRP8		1.16003	0.067	0.99392	0.043	0.15748	0.067	5e-05
tRNA-Ser(UCU,G26A)	YLR208W	SEC13	sec13-1	1.07586	0.065	0.91226	0.04	0.15749	0.065	6e-05
tRNA-Ser(UCU,G26A)	YGR099W	TEL2	tel2-7	1.38163	0.013	1.21607	0.013	0.15936	0.013	3e-05	status=JK
tRNA-Ser(UCU,G26A)	YGL092W	NUP145	nup145-r4	1.2553	0.049	1.08599	0.056	0.15956	0.049	2e-05
tRNA-Ser(UCU,G26A)	YIL062C	ARC15	arc15-10	1.22884	0.019	1.0553	0.047	0.15978	0.019	8e-05	status=JK
tRNA-Ser(UCU,G26A)	YBL105C	PKC1	pkc1-2	1.13591	0.064	0.98573	0.05	0.16042	0.064	5e-05
tRNA-Ser(UCU,G26A)	YMR013C	SEC59	sec59-ts	1.28091	0.081	1.1111	0.028	0.16108	0.081	7e-05
tRNA-Ser(UCU,G26A)	YHR067W	HTD2		1.20226	0.04	1.03949	0.003	0.16109	0.04	1e-05
tRNA-Ser(UCU,G26A)	YBL007C	SLA1		1.28807	0.095	1.13001	0.045	0.16135	0.095	0.00011
tRNA-Ser(UCU,G26A)	YIL068C	SEC6	sec6-4	1.34657	0.026	1.1863	0.017	0.16152	0.026	0
tRNA-Ser(UCU,G26A)	YER116C	SLX8		0.832	0.022	0.67163	0.008	0.16199	0.022	0.00024	status=JK
tRNA-Ser(UCU,G26A)	YGR278W	CWC22	cwc22-ph	1.25073	0.03	1.08936	0.011	0.16269	0.03	0.00019	status=JK
tRNA-Ser(UCU,G26A)	YDL077C	VAM6		0.9597	0.085	0.79944	0.009	0.16287	0.085	0.00019
tRNA-Ser(UCU,G26A)	YGR216C	GPI1	gpi1-1	1.40897	0.095	1.2483	0.082	0.16424	0.095	8e-05
tRNA-Ser(UCU,G26A)	YMR296C	LCB1	lcb1-4	0.75179	0.136	0.62086	0.132	0.16476	0.136	0.0016
tRNA-Ser(UCU,G26A)	YLR087C	CSF1		1.25246	0.065	1.0763	0.06	0.16498	0.065	4e-05
tRNA-Ser(UCU,G26A)	YFL034C-B	MOB2	mob2-8	1.33871	0.12	1.15992	0.02	0.16584	0.12	0.0002
tRNA-Ser(UCU,G26A)	YFR036W	CDC26	cdc26-1	1.37144	0.113	1.19853	0.011	0.16673	0.113	0.00015
tRNA-Ser(UCU,G26A)	YJL019W	MPS3	mps3-1	0.52147	0.066	0.39131	0.403	0.16724	0.066	0.00525	status=JK
tRNA-Ser(UCU,G26A)	YDR392W	SPT3		1.10314	0.031	0.93267	0.012	0.16781	0.031	1e-05
tRNA-Ser(UCU,G26A)	YAL041W	CDC24	cdc24-4	1.22225	0.181	1.05642	0.046	0.16794	0.181	0.00088
tRNA-Ser(UCU,G26A)	YAL001C	TFC3	tfc3-g349e	1.3231	0.081	1.14979	0.009	0.16828	0.081	6e-05
tRNA-Ser(UCU,G26A)	YFL034C-B	MOB2	mob2-14	1.14745	0.173	0.93267	0.168	0.16852	0.173	0.00092
tRNA-Ser(UCU,G26A)	YMR263W	SAP30		1.30132	0.033	1.12162	0.055	0.16854	0.033	0
tRNA-Ser(UCU,G26A)	YOL034W	SMC5	smc5-6	1.18649	0.059	1.01016	0.043	0.16895	0.059	3e-05
tRNA-Ser(UCU,G26A)	YKR084C	HBS1		1.32722	0.084	1.15395	0.041	0.17107	0.084	7e-05
tRNA-Ser(UCU,G26A)	YKL018W	SWD2	swd2-ts1	1.32159	0.14	1.12241	0.123	0.17111	0.14	0.00373	status=JK
tRNA-Ser(UCU,G26A)	YOR122C	PFY1	pfy1-4	1.0689	0.003	0.87676	0.08	0.17168	0.003	0	status=JK
tRNA-Ser(UCU,G26A)	YFL034C-B	MOB2	mob2-40	1.20537	0.165	1.02368	0.026	0.17247	0.165	0.00069
tRNA-Ser(UCU,G26A)	YMR307W	GAS1		1.30155	0.009	1.13941	0.038	0.17268	0.009	0
tRNA-Ser(UCU,G26A)	YBR167C	POP7	pop7-ph	1.26978	0.016	1.09776	0.038	0.17372	0.016	6e-05	status=JK
tRNA-Ser(UCU,G26A)	YDR315C	IPK1		1.28068	0.032	1.10782	0.017	0.17423	0.032	0
tRNA-Ser(UCU,G26A)	YCL016C	DCC1		1.28318	0.232	1.11458	0.085	0.17455	0.232	0.00158
tRNA-Ser(UCU,G26A)	YDL105W	NSE4	nse4-ts2	1.07462	0.051	0.89408	0.034	0.17497	0.051	3e-05
tRNA-Ser(UCU,G26A)	YHR036W	BRL1	brl1-k405i	1.2724	0.03	1.09759	0.03	0.17511	0.03	0
tRNA-Ser(UCU,G26A)	YDR228C	PCF11	pcf11-1	1.14595	0.028	0.96571	0.012	0.17605	0.028	0.0002	status=JK
tRNA-Ser(UCU,G26A)	YML121W	GTR1		1.1979	0.021	1.02246	0.034	0.1771	0.021	0.00011	status=JK
tRNA-Ser(UCU,G26A)	YPL233W	NSL1	nsl1-6	1.47882	0.101	1.28694	0.027	0.17762	0.101	9e-05
tRNA-Ser(UCU,G26A)	YLR436C	ECM30		1.35774	0.002	1.17105	0.033	0.1781	0.002	0	status=JK
tRNA-Ser(UCU,G26A)	YLR384C	IKI3		1.13919	0.048	0.96233	0.018	0.18085	0.048	2e-05
tRNA-Ser(UCU,G26A)	YOR143C	THI80	thi80-ph	1.29318	0.008	1.1136	0.01	0.18111	0.008	1e-05	status=JK
tRNA-Ser(UCU,G26A)	YFL034C-B	MOB2	mob2-36	1.11574	0.049	0.93364	0.014	0.1812	0.049	2e-05
tRNA-Ser(UCU,G26A)	YGR075C	PRP38	prp38-1	1.35529	0.015	1.17769	0.041	0.18126	0.015	4e-05	status=JK
tRNA-Ser(UCU,G26A)	YJL085W	EXO70	exo70-38	1.36458	0.055	1.18489	0.041	0.18236	0.055	2e-05
tRNA-Ser(UCU,G26A)	YBR160W	CDC28	cdc28-1	1.33869	0.111	1.15827	0.042	0.18356	0.111	0.00016
tRNA-Ser(UCU,G26A)	YDR463W	STP1		1.14615	0.052	0.95855	0.017	0.18404	0.052	3e-05
tRNA-Ser(UCU,G26A)	YLR127C	APC2	apc2-8	1.31483	0.019	1.13672	0.045	0.18631	0.019	0
tRNA-Ser(UCU,G26A)	YLR452C	SST2		1.16695	0.052	0.97902	0.106	0.18864	0.052	2e-05
tRNA-Ser(UCU,G26A)	YER083C	GET2		1.30166	0.067	1.09431	0.073	0.18908	0.067	0.00089	status=JK
tRNA-Ser(UCU,G26A)	YLR116W	MSL5	msl5-ph	1.3344	0.027	1.14752	0.008	0.18945	0.027	0
tRNA-Ser(UCU,G26A)	YML001W	YPT7		1.2217	0.025	1.0246	0.021	0.19044	0.025	0
tRNA-Ser(UCU,G26A)	YDR049W	VMS1		1.29945	0.097	1.10561	0.045	0.19093	0.097	0.00011
tRNA-Ser(UCU,G26A)	YKR082W	NUP133		1.35685	0.084	1.16878	0.051	0.19178	0.084	6e-05
tRNA-Ser(UCU,G26A)	YAL011W	SWC3		1.32907	0.079	1.12639	0.028	0.19213	0.079	6e-05
tRNA-Ser(UCU,G26A)	YFL034C-B	MOB2	mob2-34	1.05501	0.034	0.86042	0.022	0.19249	0.034	1e-05
tRNA-Ser(UCU,G26A)	YMR168C	CEP3	cep3-1	1.40671	0.148	1.19831	0.131	0.19277	0.148	0.00032
tRNA-Ser(UCU,G26A)	YJR042W	NUP85	yjr042w-ph	1.21379	0.06	1.01622	0.005	0.19488	0.06	3e-05
tRNA-Ser(UCU,G26A)	YDR081C	PDC2	ydr081c-ph	0.37693	0.134	0.18405	0.029	0.19722	0.134	0.01116
tRNA-Ser(UCU,G26A)	YIL040W	APQ12		0.96688	0.017	0.75831	0.077	0.19834	0.017	0
tRNA-Ser(UCU,G26A)	YJL090C	DPB11	dpb11-1	1.35244	0.046	1.14351	0.037	0.19926	0.046	1e-05
tRNA-Ser(UCU,G26A)	YLL003W	SFI1	sfi1-3	1.37075	0.076	1.16608	0.08	0.19935	0.076	5e-05
tRNA-Ser(UCU,G26A)	YDR246W	TRS23	trs23-ph	0.9895	0.178	0.77766	0.072	0.20067	0.178	0.00156
tRNA-Ser(UCU,G26A)	YLR110C	CCW12		1.31512	0.064	1.09994	0.062	0.20091	0.064	3e-05
tRNA-Ser(UCU,G26A)	YOR236W	DFR1	dfr1-td	0.75775	0.217	0.574	0.045	0.20217	0.217	0.00606
tRNA-Ser(UCU,G26A)	YDL097C	RPN6	rpn6-1	1.28621	0.054	1.08327	0.056	0.20374	0.054	2e-05
tRNA-Ser(UCU,G26A)	YFL038C	YPT1	ypt1-3	1.23916	0.052	1.0353	0.014	0.20411	0.052	2e-05
tRNA-Ser(UCU,G26A)	YHR101C	BIG1	big1-ph	1.37756	0.047	1.17738	0.031	0.20488	0.047	1e-05
tRNA-Ser(UCU,G26A)	YKL024C	URA6	ura6-6	1.12448	0.163	0.89784	0.073	0.20608	0.163	0.00083
tRNA-Ser(UCU,G26A)	YLR229C	CDC42	cdc42-1	1.366	0.068	1.1627	0.048	0.2067	0.068	3e-05
tRNA-Ser(UCU,G26A)	YFL034C-B	MOB2	mob2-19	1.13851	0.082	0.92436	0.06	0.20734	0.082	0.0001
tRNA-Ser(UCU,G26A)	YHR189W	PTH1		1.31265	0.041	1.10448	0.006	0.20792	0.041	1e-05
tRNA-Ser(UCU,G26A)	YML103C	NUP188		1.18539	0.006	0.97587	0.016	0.20867	0.006	1e-05	status=JK
tRNA-Ser(UCU,G26A)	YGL093W	SPC105	spc105-4	1.46708	0.127	1.25004	0.011	0.20915	0.127	0.00018
tRNA-Ser(UCU,G26A)	YDR331W	GPI8	gpi8-ts	1.1253	0.011	0.91682	0.036	0.20954	0.011	3e-05	status=JK
tRNA-Ser(UCU,G26A)	YOR004W	UTP23	utp23-ph	1.41322	0.105	1.20485	0.002	0.20996	0.105	0.00011
tRNA-Ser(UCU,G26A)	YDR228C	PCF11	pcf11-ts2	1.18984	0.037	0.98525	0.035	0.21096	0.037	1e-05
tRNA-Ser(UCU,G26A)	YBR004C	GPI18	ybr004c-ph	1.32041	0.061	1.10184	0.01	0.21228	0.061	3e-05
tRNA-Ser(UCU,G26A)	YDR478W	SNM1	snm1-ph	0.26326	0.148	0.05306	0.054	0.2125	0.148	0.0379
tRNA-Ser(UCU,G26A)	YLL031C	GPI13	gpi13-3	1.04377	0.013	0.818	0.085	0.21385	0.013	5e-05	status=JK
tRNA-Ser(UCU,G26A)	YLR314C	CDC3	cdc3-3	1.45531	0.073	1.23772	0.011	0.21491	0.073	3e-05
tRNA-Ser(UCU,G26A)	YKL193C	SDS22	sds22-5	1.39433	0.015	1.17662	0.022	0.21504	0.015	4e-05	status=JK
tRNA-Ser(UCU,G26A)	YGR119C	NUP57	nup57-e17	1.05479	0.028	0.83442	0.033	0.21615	0.028	1e-05
tRNA-Ser(UCU,G26A)	YNL041C	COG6		1.17775	0.056	0.95706	0.041	0.21764	0.056	3e-05
tRNA-Ser(UCU,G26A)	YOR122C	PFY1	pfy1-14	1.31191	0.086	1.10323	0.023	0.21819	0.086	8e-05
tRNA-Ser(UCU,G26A)	YAL041W	CDC24	cdc24-3	0.64684	0.45	0.49565	0.371	0.21859	0.45	0.06381
tRNA-Ser(UCU,G26A)	YDR288W	NSE3	nse3-ph	1.00399	0.016	0.77766	0.031	0.22006	0.016	8e-05	status=JK
tRNA-Ser(UCU,G26A)	YPR060C	ARO7		1.31962	0.102	1.09024	0.118	0.22011	0.102	0.00013
tRNA-Ser(UCU,G26A)	YBR011C	IPP1	ipp1-ph	0.2234	0.259	0	0	0.22331	0.259	0.18284
tRNA-Ser(UCU,G26A)	YLR410W	VIP1		1.28586	0.041	1.06148	0.011	0.22378	0.041	1e-05
tRNA-Ser(UCU,G26A)	YDR276C	PMP3		1.41923	0.071	1.19235	0.021	0.22384	0.071	3e-05
tRNA-Ser(UCU,G26A)	YBR123C	TFC1	tfc1-e447k	1.38621	0.016	1.17617	0.067	0.22414	0.016	5e-05	status=JK
tRNA-Ser(UCU,G26A)	YFL037W	TUB2	tub2-443	1.47844	0.039	1.23612	0.037	0.22623	0.039	0
tRNA-Ser(UCU,G26A)	YIL004C	BET1	bet1-1	1.26235	0.034	1.02594	0.043	0.22788	0.034	0.00025	status=JK
tRNA-Ser(UCU,G26A)	YFR037C	RSC8	rsc8-ts16	1.31754	0.133	1.08336	0.049	0.23506	0.133	0.00028
tRNA-Ser(UCU,G26A)	YMR117C	SPC24	spc24-10	1.41859	0.081	1.18497	0.023	0.23644	0.081	5e-05
tRNA-Ser(UCU,G26A)	YJL148W	RPA34		1.27078	0.083	1.04529	0.063	0.23704	0.083	8e-05
tRNA-Ser(UCU,G26A)	YJL174W	KRE9	yjl174w-ph	1.3497	0.022	1.10552	0.023	0.23719	0.022	0
tRNA-Ser(UCU,G26A)	YMR093W	UTP15	ymr093w-ph	0.36727	0.123	0.19401	0.247	0.23754	0.123	0.0095
tRNA-Ser(UCU,G26A)	YBR109C	CMD1	cmd1-8	1.33958	0.003	1.10714	0.057	0.23797	0.003	0	status=JK
tRNA-Ser(UCU,G26A)	YHR190W	ERG9	erg9-ph	1.2595	0.056	1.01854	0.06	0.23866	0.056	2e-05
tRNA-Ser(UCU,G26A)	YNL021W	HDA1		1.57357	0.024	1.32418	0.013	0.23995	0.024	8e-05	status=JK
tRNA-Ser(UCU,G26A)	YCL004W	PGS1	ycl004w-ph	1.40353	0.017	1.14888	0.067	0.24024	0.017	5e-05	status=JK
tRNA-Ser(UCU,G26A)	YJL085W	EXO70	exo70-29/37	1.01993	0.063	0.79381	0.034	0.24166	0.063	7e-05
tRNA-Ser(UCU,G26A)	YBL105C	PKC1	pkc1-1	1.45695	0.03	1.21289	0.023	0.2445	0.03	0
tRNA-Ser(UCU,G26A)	YER155C	BEM2		1.17336	0.069	0.92373	0.021	0.24533	0.069	6e-05
tRNA-Ser(UCU,G26A)	YDL002C	NHP10		1.2704	0.072	1.02336	0.02	0.24697	0.072	5e-05
tRNA-Ser(UCU,G26A)	YLR166C	SEC10	sec10-2	1.30313	0.008	1.05084	0.02	0.24753	0.008	1e-05	status=JK
tRNA-Ser(UCU,G26A)	YJL074C	SMC3	smc3-1	1.25335	0.096	0.99963	0.017	0.25301	0.096	0.00196	status=JK
tRNA-Ser(UCU,G26A)	YPL120W	VPS30		1.4488	0.085	1.18278	0.034	0.2566	0.085	6e-05
tRNA-Ser(UCU,G26A)	YGR120C	COG2	cog2-1	1.26577	0.054	1.01177	0.014	0.25986	0.054	2e-05
tRNA-Ser(UCU,G26A)	YDR168W	CDC37	cdc37-1	1.40335	0.002	1.14593	0.029	0.26075	0.002	0	status=JK
tRNA-Ser(UCU,G26A)	YGR140W	CBF2	cbf2-42	1.40321	0.07	1.13397	0.044	0.26175	0.07	3e-05
tRNA-Ser(UCU,G26A)	YAL041W	CDC24	cdc24-h	1.40164	0.214	1.13156	0.035	0.26474	0.214	0.00096
tRNA-Ser(UCU,G26A)	YNL158W	PGA1	pga1-ph	1.41822	0.111	1.13106	0.059	0.265	0.111	0.00013
tRNA-Ser(UCU,G26A)	YLR383W	SMC6	smc6-9	1.42562	0.106	1.16233	0.06	0.26624	0.106	0.00011
tRNA-Ser(UCU,G26A)	YBR236C	ABD1	abd1-8	1.28105	0.021	1.0047	0.039	0.27212	0.021	0
tRNA-Ser(UCU,G26A)	YER148W	SPT15	spt15-p65s	0.67318	0.008	0.40158	0.386	0.27246	0.008	5e-05	status=JK
tRNA-Ser(UCU,G26A)	YDL014W	NOP1	nop1-2	0.56376	0.429	0.31948	0.114	0.27387	0.429	0.07861
tRNA-Ser(UCU,G26A)	YJL097W	PHS1	phs1-ph	1.53841	0.092	1.26847	0.038	0.27685	0.092	6e-05
tRNA-Ser(UCU,G26A)	YLR459W	GAB1	gab1-3	1.35118	0.059	1.07135	0.032	0.2784	0.059	2e-05
tRNA-Ser(UCU,G26A)	YKL024C	URA6	ura6-5	0.79675	0.034	0.50425	0.057	0.27902	0.034	0.0006	status=JK
tRNA-Ser(UCU,G26A)	YFL029C	CAK1	cak1-23	1.3422	0.044	1.06437	0.012	0.27927	0.044	1e-05
tRNA-Ser(UCU,G26A)	YNL071W	LAT1		1.3086	0.117	0.96296	0.25	0.28227	0.117	0.0002
tRNA-Ser(UCU,G26A)	YHR005C	GPA1	gpa1-ts	1.4059	0.124	1.10785	0.05	0.28346	0.124	0.00019
tRNA-Ser(UCU,G26A)	YIR010W	DSN1	dsn1-7	1.42468	0.056	1.12873	0.044	0.28359	0.056	2e-05
tRNA-Ser(UCU,G26A)	YPL076W	GPI2	gpi2-774	1.31519	0.058	1.0205	0.025	0.28852	0.058	0.00065	status=JK
tRNA-Ser(UCU,G26A)	YMR220W	ERG8	erg8-1	1.59946	0.052	1.29263	0.062	0.28855	0.052	1e-05
tRNA-Ser(UCU,G26A)	YGL255W	ZRT1		1.45559	0.074	1.16058	0.023	0.29178	0.074	4e-05
tRNA-Ser(UCU,G26A)	YLR268W	SEC22	sec22-1	1.29842	0.029	0.9989	0.037	0.29231	0.029	0.00017	status=JK
tRNA-Ser(UCU,G26A)	YHR020W	YHR020W	yhr020w-ph	1.39061	0.013	1.09773	0.046	0.29794	0.013	3e-05	status=JK
tRNA-Ser(UCU,G26A)	YGR264C	MES1	mes1-1	0.82773	0.091	0.50708	0.035	0.30284	0.091	0.00036
tRNA-Ser(UCU,G26A)	YFL034C-B	MOB2	mob2-11	1.0913	0.122	0.79534	0.163	0.30826	0.122	0.00038
tRNA-Ser(UCU,G26A)	YFL034C-B	MOB2	mob2-22	1.2106	0.025	0.89732	0.019	0.30909	0.025	0
tRNA-Ser(UCU,G26A)	YDR331W	GPI8	ydr331w-ph	1.48493	0.101	1.15368	0.036	0.31132	0.101	9e-05
tRNA-Ser(UCU,G26A)	YER133W	GLC7	glc7-10	1.19673	0.031	0.87842	0.052	0.3118	0.031	0.00022	status=JK
tRNA-Ser(UCU,G26A)	YKL095W	YJU2	yju2-ph	1.38071	0.081	1.0492	0.074	0.31496	0.081	6e-05
tRNA-Ser(UCU,G26A)	YFL034C-B	MOB2	mob2-28	1.04197	0.1	0.68194	0.317	0.32059	0.1	0.00307	status=JK
tRNA-Ser(UCU,G26A)	YOR260W	GCD1	gcd1-502	1.23087	0.028	0.89754	0.041	0.32431	0.028	0.00017	status=JK
tRNA-Ser(UCU,G26A)	YDR082W	STN1	stn1-13	1.41197	0.032	1.09164	0.047	0.3246	0.032	0
tRNA-Ser(UCU,G26A)	YBR135W	CKS1	cks1-38	1.2194	0.217	0.89499	0.016	0.32713	0.217	0.00151
tRNA-Ser(UCU,G26A)	YLR115W	CFT2	cft2-ph	1.0882	0.492	0.74465	0.203	0.32777	0.491	0.02141
tRNA-Ser(UCU,G26A)	YMR268C	PRP24	prp24-ts	1.67321	0.131	1.34333	0.022	0.32879	0.131	0.00013
tRNA-Ser(UCU,G26A)	YDR086C	SSS1	sss1-ph	1.51559	0.07	1.1802	0.057	0.33034	0.07	3e-05
tRNA-Ser(UCU,G26A)	YPR165W	RHO1	rho1-td	1.16897	0.026	0.85292	0.071	0.33521	0.026	0.00016	status=JK
tRNA-Ser(UCU,G26A)	YLR310C	CDC25	cdc25-1	0.5084	0.545	0.29726	0.258	0.35389	0.545	0.15892
tRNA-Ser(UCU,G26A)	YHR083W	SAM35	sam35-2	1.43827	0.307	1.03605	0.213	0.35495	0.307	0.00258
tRNA-Ser(UCU,G26A)	YDR168W	CDC37	cdc37-ts	1.33325	0.107	0.97957	0.089	0.35956	0.107	0.00014
tRNA-Ser(UCU,G26A)	YKL048C	ELM1		1.50854	0.078	1.13537	0.08	0.36083	0.078	4e-05
tRNA-Ser(UCU,G26A)	YDR378C	LSM6		1.4983	0.053	1.12544	0.024	0.37603	0.053	1e-05
tRNA-Ser(UCU,G26A)	YNL136W	EAF7		1.43335	0.049	1.04917	0.041	0.37867	0.049	1e-05
tRNA-Ser(UCU,G26A)	YHR030C	SLT2		1.25265	0.261	0.87476	0.107	0.38224	0.261	0.00241
tRNA-Ser(UCU,G26A)	YBR195C	MSI1		1.56464	0.101	1.14808	0.094	0.38976	0.101	7e-05
tRNA-Ser(UCU,G26A)	YGR002C	SWC4	swc4-4	0.87327	0.171	0.39936	0.312	0.42025	0.171	0.002
tRNA-Ser(UCU,G26A)	YDR052C	DBF4	dbf4-3	1.59511	0.09	1.16726	0.115	0.42633	0.09	5e-05
tRNA-Ser(UCU,G26A)	YGL075C	MPS2	mps2-1	0.68899	0.732	0.24139	0.045	0.43734	0.731	0.15616
tRNA-Ser(UCU,G26A)	YBR110W	ALG1	alg1-1	1.66381	0.105	1.21551	0.035	0.44654	0.105	7e-05
tRNA-Ser(UCU,G26A)	YLR191W	PEX13		1.65577	0.121	1.19184	0.05	0.46535	0.121	0.00011
tRNA-Ser(UCU,G26A)	YOR057W	SGT1	sgt1-5	1.49341	0.225	1.0088	0.049	0.47599	0.225	0.00093
tRNA-Ser(UCU,G26A)	YBR236C	ABD1	abd1-5	1.46642	0.07	1.00282	0.036	0.48231	0.07	0.00076	status=JK
tRNA-Ser(UCU,G26A)	YMR308C	PSE1	pse1-34	0.60431	0.543	0.13024	0.039	0.48365	0.543	0.11237
tRNA-Ser(UCU,G26A)	YML077W	BET5	bet5-ph	1.55667	0.216	1.04643	0.013	0.50397	0.216	0.00072
tRNA-Ser(UCU,G26A)	YIL126W	STH1	sth1-2	0.66591	0.613	0.16535	0.139	0.54206	0.613	0.1183
tRNA-Ser(UCU,G26A)	YJR072C	NPA3	npa3-ph	1.77673	0.169	1.1896	0.064	0.57534	0.168	0.00023	status=CP
tRNA-Ser(UCU,G26A)	YMR075W	RCO1		1.61019	0.097	1.02405	0.032	0.57833	0.097	6e-05
tRNA-Ser(UCU,G26A)	YCR002C	CDC10	cdc10-2	1.70631	0.054	1.11256	0.026	0.58173	0.054	1e-05
tRNA-Ser(UCU,G26A)	YDR170C	SEC7	sec7-1	1.67429	0.063	1.08276	0.058	0.59027	0.063	1e-05
tRNA-Ser(UCU,G26A)	YDR201W	SPC19	spc19-ph	1.79428	0.159	1.12934	0.099	0.66784	0.159	0.00019	status=CP
tRNA-Ser(UCU,G26A)	YDL190C	UFD2		#NUM!	#NUM!	#NUM!	#NUM!	#NUM!	#NUM!	#NUM!	status=LK
tRNA-Ser(UCU,G26A)	YEL026W	SNU13	snu13-ph	#NUM!	#NUM!	#NUM!	#NUM!	#NUM!	#NUM!	#NUM!	status=LK
tRNA-Ser(UCU,G26A)	YEL032W	MCM3	mcm3-1	#NUM!	#NUM!	#NUM!	#NUM!	#NUM!	#NUM!	#NUM!	status=LK
tRNA-Ser(UCU,G26A)	YNL282W	POP3	pop3-ph	#NUM!	#NUM!	#NUM!	#NUM!	#NUM!	#NUM!	#NUM!	status=LK
tRNA-Ser(UCU,G26A)	YNL312W	RFA2	rfa2-ph	#NUM!	#NUM!	#NUM!	#NUM!	#NUM!	#NUM!	#NUM!	status=LK
tRNA-Ser(UCU,G26A)	YNL247W	YNL247W	ynl247w-ph	#NUM!	#NUM!	#NUM!	#NUM!	#NUM!	#NUM!	#NUM!	status=LK
tRNA-Ser(UCU,G26A)	YDL164C	CDC9	cdc9-1	#NUM!	#NUM!	#NUM!	#NUM!	#NUM!	#NUM!	#NUM!	status=LK
tRNA-Ser(UCU,G26A)	YNL261W	ORC5	orc5-70	#NUM!	#NUM!	#NUM!	#NUM!	#NUM!	#NUM!	#NUM!	status=LK
tRNA-Ser(UCU,G26A)	YER022W	SRB4	srb4-2	#NUM!	#NUM!	#NUM!	#NUM!	#NUM!	#NUM!	#NUM!	status=LK
tRNA-Ser(UCU,G26A)	YEL055C	POL5	pol5-3	#NUM!	#NUM!	#NUM!	#NUM!	#NUM!	#NUM!	#NUM!	status=LK
tRNA-Ser(UCU,G26A)	YDL145C	COP1	cop1-1	#NUM!	#NUM!	#NUM!	#NUM!	#NUM!	#NUM!	#NUM!	status=LK
tRNA-Ser(UCU,G26A)	YDL126C	CDC48	cdc48-4601	#NUM!	#NUM!	#NUM!	#NUM!	#NUM!	#NUM!	#NUM!	status=LK
tRNA-Ser(UCU,G26A)	YNL222W	SSU72	ssu72-2	#NUM!	#NUM!	#NUM!	#NUM!	#NUM!	#NUM!	#NUM!	status=LK
tRNA-Ser(UCU,G26A)	BLANK	BLANK		0	0	0	0	#NUM!	#NUM!	#NUM!
tRNA-Ser(UCU,G26A)	YDL213C	NOP6		#NUM!	#NUM!	#NUM!	#NUM!	#NUM!	#NUM!	#NUM!	status=LK
tRNA-Ser(UCU,G26A)	YDL147W	RPN5	rpn5-ph	#NUM!	#NUM!	#NUM!	#NUM!	#NUM!	#NUM!	#NUM!	status=LK
tRNA-Ser(UCU,G26A)	YNL182C	IPI3	ipi3-ph	#NUM!	#NUM!	#NUM!	#NUM!	#NUM!	#NUM!	#NUM!	status=LK
tRNA-Ser(UCU,G26A)	YNL181W	YNL181W	ynl181w-ph	#NUM!	#NUM!	#NUM!	#NUM!	#NUM!	#NUM!	#NUM!	status=LK
tRNA-Ser(UCU,G26A)	YDL193W	NUS1	nus1-ph	#NUM!	#NUM!	#NUM!	#NUM!	#NUM!	#NUM!	#NUM!	status=LK
tRNA-Ser(UCU,G26A)	YDL148C	NOP14	ydl148c-ph	#NUM!	#NUM!	#NUM!	#NUM!	#NUM!	#NUM!	#NUM!	status=LK
tRNA-Ser(UCU,G26A)	YNL263C	YIF1	yif1-td	#NUM!	#NUM!	#NUM!	#NUM!	#NUM!	#NUM!	#NUM!	status=LK
tRNA-Ser(UCU,G26A)	YNL262W	POL2	pol2-12	#NUM!	#NUM!	#NUM!	#NUM!	#NUM!	#NUM!	#NUM!	status=LK
tRNA-Ser(UCU,G26A)	YNL207W	RIO2	rio2-1	#NUM!	#NUM!	#NUM!	#NUM!	#NUM!	#NUM!	#NUM!	status=LK
tRNA-Ser(UCU,G26A)	YER012W	PRE1	pre1-1	#NUM!	#NUM!	#NUM!	#NUM!	#NUM!	#NUM!	#NUM!	status=LK
tRNA-Ser(UCU,G26A)	YDL165W	CDC36	cdc36-16	#NUM!	#NUM!	#NUM!	#NUM!	#NUM!	#NUM!	#NUM!	status=LK
tRNA-Ser(UCU,G26A)	YER008C	SEC3	sec3-2	#NUM!	#NUM!	#NUM!	#NUM!	#NUM!	#NUM!	#NUM!	status=LK
tRNA-Ser(UCU,G26A)	YEL055C	POL5	pol5-1	#NUM!	#NUM!	#NUM!	#NUM!	#NUM!	#NUM!	#NUM!	status=LK
tRNA-Ser(UCU,G26A)	YDL143W	CCT4	cct4-1	#NUM!	#NUM!	#NUM!	#NUM!	#NUM!	#NUM!	#NUM!	status=LK
tRNA-Ser(UCU,G26A)	YEL034W	HYP2	hyp2-1159	#NUM!	#NUM!	#NUM!	#NUM!	#NUM!	#NUM!	#NUM!	status=LK
tRNA-Ser(UCU,G26A)	YEL034W	HYP2	hyp2-2	#NUM!	#NUM!	#NUM!	#NUM!	#NUM!	#NUM!	#NUM!	status=LK
tRNA-Ser(UCU,G26A)	YDL195W	SEC31	sec31-1	#NUM!	#NUM!	#NUM!	#NUM!	#NUM!	#NUM!	#NUM!	status=LK
tRNA-Ser(UCU,G26A)	YDL220C	CDC13	cdc13-1	#NUM!	#NUM!	#NUM!	#NUM!	#NUM!	#NUM!	#NUM!	status=LK
tRNA-Ser(UCU,G26A)	YDL207W	GLE1	gle1-2	#NUM!	#NUM!	#NUM!	#NUM!	#NUM!	#NUM!	#NUM!	status=LK
tRNA-Ser(UCU,G26A)	YDL132W	CDC53	cdc53-1	#NUM!	#NUM!	#NUM!	#NUM!	#NUM!	#NUM!	#NUM!	status=LK
tRNA-Ser(UCU,G26A)	BLANK	BLANK		0	0	0	0	#NUM!	#NUM!	#NUM!
tRNA-Ser(UCU,G26A)	YDL192W	ARF1		#NUM!	#NUM!	#NUM!	#NUM!	#NUM!	#NUM!	#NUM!	status=LK
tRNA-Ser(UCU,G26A)	YDL147W	RPN5	rpn5-1	#NUM!	#NUM!	#NUM!	#NUM!	#NUM!	#NUM!	#NUM!	status=LK
tRNA-Ser(UCU,G26A)	YDL209C	CWC2	cwc2-1	#NUM!	#NUM!	#NUM!	#NUM!	#NUM!	#NUM!	#NUM!	status=LK
tRNA-Ser(UCU,G26A)	YNL163C	RIA1	ria1-ts	#NUM!	#NUM!	#NUM!	#NUM!	#NUM!	#NUM!	#NUM!	status=LK
tRNA-Ser(UCU,G26A)	YER003C	PMI40	pmi40-ph	#NUM!	#NUM!	#NUM!	#NUM!	#NUM!	#NUM!	#NUM!	status=LK
tRNA-Ser(UCU,G26A)	YER023W	PRO3	pro3-ph	#NUM!	#NUM!	#NUM!	#NUM!	#NUM!	#NUM!	#NUM!	status=LK
tRNA-Ser(UCU,G26A)	YER009W	NTF2	ntf2-ph	#NUM!	#NUM!	#NUM!	#NUM!	#NUM!	#NUM!	#NUM!	status=LK
tRNA-Ser(UCU,G26A)	YNL267W	PIK1	pik1-104	#NUM!	#NUM!	#NUM!	#NUM!	#NUM!	#NUM!	#NUM!	status=LK
tRNA-Ser(UCU,G26A)	YNL267W	PIK1	pik1-139	#NUM!	#NUM!	#NUM!	#NUM!	#NUM!	#NUM!	#NUM!	status=LK
tRNA-Ser(UCU,G26A)	YDL126C	CDC48	cdc48-3	#NUM!	#NUM!	#NUM!	#NUM!	#NUM!	#NUM!	#NUM!	status=LK
tRNA-Ser(UCU,G26A)	YER009W	NTF2	ntf2-h104y	#NUM!	#NUM!	#NUM!	#NUM!	#NUM!	#NUM!	#NUM!	status=LK
tRNA-Ser(UCU,G26A)	YNL287W	SEC21	sec21-1	#NUM!	#NUM!	#NUM!	#NUM!	#NUM!	#NUM!	#NUM!	status=LK
tRNA-Ser(UCU,G26A)	YNL216W	RAP1	rap1-2	#NUM!	#NUM!	#NUM!	#NUM!	#NUM!	#NUM!	#NUM!	status=LK
tRNA-Ser(UCU,G26A)	YNL272C	SEC2	sec2-41	#NUM!	#NUM!	#NUM!	#NUM!	#NUM!	#NUM!	#NUM!	status=LK
tRNA-Ser(UCU,G26A)	YEL002C	WBP1	wbp1-2	#NUM!	#NUM!	#NUM!	#NUM!	#NUM!	#NUM!	#NUM!	status=LK
tRNA-Ser(UCU,G26A)	YEL002C	WBP1	wbp1-1	#NUM!	#NUM!	#NUM!	#NUM!	#NUM!	#NUM!	#NUM!	status=LK
tRNA-Ser(UCU,G26A)	YDL217C	TIM22	tim22-19	#NUM!	#NUM!	#NUM!	#NUM!	#NUM!	#NUM!	#NUM!	status=LK
tRNA-Ser(UCU,G26A)	YEL034W	HYP2	hyp2-1	#NUM!	#NUM!	#NUM!	#NUM!	#NUM!	#NUM!	#NUM!	status=LK
tRNA-Ser(UCU,G26A)	YEL034W	HYP2	hyp2-3	#NUM!	#NUM!	#NUM!	#NUM!	#NUM!	#NUM!	#NUM!	status=LK
tRNA-Ser(UCU,G26A)	YDL140C	RPO21	rpo21-1	#NUM!	#NUM!	#NUM!	#NUM!	#NUM!	#NUM!	#NUM!	status=LK
tRNA-Ser(UCU,G26A)	YDL207W	GLE1	gle1-4	#NUM!	#NUM!	#NUM!	#NUM!	#NUM!	#NUM!	#NUM!	status=LK
tRNA-Ser(UCU,G26A)	BLANK	BLANK		0	0	0	0	#NUM!	#NUM!	#NUM!
tRNA-Ser(UCU,G26A)	YNL163C	RIA1	ria1-ts	#NUM!	#NUM!	#NUM!	#NUM!	#NUM!	#NUM!	#NUM!	status=LK
tRNA-Ser(UCU,G26A)	YNL232W	CSL4	csl4-ph	#NUM!	#NUM!	#NUM!	#NUM!	#NUM!	#NUM!	#NUM!	status=LK
tRNA-Ser(UCU,G26A)	YDL208W	NHP2	nhp2-ph	#NUM!	#NUM!	#NUM!	#NUM!	#NUM!	#NUM!	#NUM!	status=LK
tRNA-Ser(UCU,G26A)	YNL189W	SRP1	srp1-ph	#NUM!	#NUM!	#NUM!	#NUM!	#NUM!	#NUM!	#NUM!	status=LK
tRNA-Ser(UCU,G26A)	YDL126C	CDC48	cdc48-9	#NUM!	#NUM!	#NUM!	#NUM!	#NUM!	#NUM!	#NUM!	status=LK
tRNA-Ser(UCU,G26A)	YDL126C	CDC48	cdc48-2	#NUM!	#NUM!	#NUM!	#NUM!	#NUM!	#NUM!	#NUM!	status=LK
tRNA-Ser(UCU,G26A)	YER013W	PRP22	prp22-1	#NUM!	#NUM!	#NUM!	#NUM!	#NUM!	#NUM!	#NUM!	status=LK
tRNA-Ser(UCU,G26A)	YNL258C	DSL1	dsl1-dc30	#NUM!	#NUM!	#NUM!	#NUM!	#NUM!	#NUM!	#NUM!	status=LK
tRNA-Ser(UCU,G26A)	YER018C	SPC25	spc25-1	#NUM!	#NUM!	#NUM!	#NUM!	#NUM!	#NUM!	#NUM!	status=LK
tRNA-Ser(UCU,G26A)	YEL019C	MMS21	mms21-1	#NUM!	#NUM!	#NUM!	#NUM!	#NUM!	#NUM!	#NUM!	status=LK
tRNA-Ser(UCU,G26A)	YNL216W	RAP1	rap1-1	#NUM!	#NUM!	#NUM!	#NUM!	#NUM!	#NUM!	#NUM!	status=LK
tRNA-Ser(UCU,G26A)	YEL055C	POL5	pol5-2	#NUM!	#NUM!	#NUM!	#NUM!	#NUM!	#NUM!	#NUM!	status=LK
tRNA-Ser(UCU,G26A)	YER006W	NUG1	nug1-2	#NUM!	#NUM!	#NUM!	#NUM!	#NUM!	#NUM!	#NUM!	status=LK
tRNA-Ser(UCU,G26A)	YEL026W	SNU13	snu13-l67w	#NUM!	#NUM!	#NUM!	#NUM!	#NUM!	#NUM!	#NUM!	status=LK
tRNA-Ser(UCU,G26A)	YDL126C	CDC48	cdc48-1	#NUM!	#NUM!	#NUM!	#NUM!	#NUM!	#NUM!	#NUM!	status=LK
tRNA-Ser(UCU,G26A)	YDL132W	CDC53	cdc53-1	#NUM!	#NUM!	#NUM!	#NUM!	#NUM!	#NUM!	#NUM!	status=LK
tRNA-Ser(UCU,G26A)	YER038C	KRE29	kre29-ts2	#NUM!	#NUM!	#NUM!	#NUM!	#NUM!	#NUM!	#NUM!	status=LK
tRNA-Ser(UCU,G26A)	BLANK	BLANK		0	0	0	0	#NUM!	#NUM!	#NUM!
